# Supplementary material for: Impact of the COVID-19 lockdown on psychological health and nutritional habits in Italy: results from the #PRESTOinsieme study
Source: PubMed Central journal article supplement — BMJ Open. 2022 Apr 5;12(4):e048916. doi: 10.1136/bmjopen-2021-048916 (PMC8983406; doi:10.1136/bmjopen-2021-048916), 2022-04-05

Table S1. Respondents characteristics and habits according to residency; high incidence of COVID-19 regions (i.e., Piemonte, Veneto, Lombardia, Emilia-Romagna) and low incidence COVID-19 regions.

|                                            | N    | Low COVID-19 Incidence<br>(N=2301) | High COVID-19 Incidence<br>(N=2677) | Combined<br>(N=4978) | P-value |
|--------------------------------------------|------|------------------------------------|-------------------------------------|----------------------|---------|
| Age                                        | 4978 | 25/36/53                           | 27/39/55                            | 26/38/54             | <0.001  |
| Gender: Female                             | 4974 | 63% (1454)                         | 63% (1676)                          | 63% (3130)           | 0.614   |
| Male                                       |      | 37% ( 43)                          | 37% (1001)                          | 37% (1844)           |         |
| Nationality: Other                         | 4977 | 2% (42)                            | 1% (31)                             | 1% (73)              | 0.051   |
| Italian                                    |      | 98% (2259)                         | 99% (2645)                          | 99% (4904)           |         |
| Educational level: Secondary education     | 4973 | 51% (1175)                         | 45% (1193)                          | 48% (2368)           | <0.001  |
| University education                       |      | 48% (1113)                         | 55% (1475)                          | 52% (2588)           |         |
| Primary education                          |      | 0% (10)                            | 0% (7)                              | 0% (17)              |         |
| Working status: Active employee            | 4972 | 63% (1442)                         | 70% (1877)                          | 67% (3319)           | <0.001  |
| Unemployed/Retired/Homemaker               |      | 16% (376)                          | 13% (360)                           | 15% (736)            |         |
| Student                                    |      | 21% (481)                          | 16% (436)                           | 18% (917)            |         |
| House type: Multi-family house             | 4969 | 72% (1660)                         | 60% (1603)                          | 66% (3263)           | <0.001  |
| Single room apartment                      |      | 3% (60)                            | 2% (51)                             | 2% (111)             |         |
| Single-family house                        |      | 25% (579)                          | 38% (1016)                          | 32% (1595)           |         |
| Garden: No                                 | 4967 | 50% (1150)                         | 35% (932)                           | 42% (2082)           | <0.001  |
| Yes                                        |      | 50% (1147)                         | 65% (1738)                          | 58% (2885)           |         |
| Nasopharyngeal swab: No                    | 3221 | 97% (1371)                         | 90% (1623)                          | 93% (2994)           | <0.001  |
| Yes                                        |      | 3% (39)                            | 10% (188)                           | 7% (227)             |         |
| Recent loss: No                            | 3208 | 90% (1267)                         | 89% (1604)                          | 89% (2871)           | 0.186   |
| Yes                                        |      | 10% (136)                          | 11% (201)                           | 11% (337)            |         |
| Living alone: No                           | 4870 | 89% (1995)                         | 88% (2315)                          | 89% (4310)           | 0.196   |
| Yes                                        |      | 11% (243)                          | 12% (317)                           | 11% (560)            |         |
| Physical activity: No                      | 3981 | 55% (971)                          | 57% (1251)                          | 56% (2222)           | 0.159   |
| Yes                                        |      | 45% (808)                          | 43% (951)                           | 44% (1759)           |         |
| <i>Dietary habits (weekly consumption)</i> |      |                                    |                                     |                      |         |

---

|                                              |      |          |        |        |        |
|----------------------------------------------|------|----------|--------|--------|--------|
| Pasta, Rice, Cereals                         | 3977 | 5/7/10   | 5/7/10 | 5/7/10 | 0.215  |
| Cereal-based products                        | 3974 | 3/7/7    | 4/7/7  | 4/7/7  | <0.001 |
| Raw meat                                     | 3975 | 2/3/4.25 | 2/3/4  | 2/3/4  | 0.005  |
| Cured meat                                   | 3971 | 1/2/3    | 1/2/3  | 1/2/3  | <0.001 |
| Fish                                         | 3975 | 1/2/3    | 1/1/2  | 1/2/2  | <0.001 |
| Milk and yogurt                              | 3972 | 2/7/7    | 2/7/7  | 2/7/7  | 0.782  |
| Milk-based products                          | 3974 | 2/3/5    | 2/3/5  | 2/3/5  | 0.017  |
| Fruit                                        | 3975 | 4/7/10   | 4/7/12 | 4/7/10 | <0.001 |
| Dried fruit                                  | 3971 | 0/2/5    | 0/2/5  | 0/2/5  | 0.25   |
| Vegetables                                   | 3974 | 5/7/14   | 6/7/14 | 6/7/14 | <0.001 |
| Legumes                                      | 3972 | 2/3/4    | 1/2/4  | 1/3/4  | 0.005  |
| Eggs                                         | 3974 | 1/2/3    | 1/2/2  | 1/2/2  | 0.014  |
| Food high in fat and sugar                   | 3970 | 1/3/6    | 2/4/7  | 2/3/7  | 0.241  |
| Soft drinks                                  | 3969 | 0/0/1    | 0/0/1  | 0/0/1  | 0.969  |
| Alcoholic drinks (e.g., wine, beer, spirits) | 3971 | 0/1/4    | 0/1/4  | 0/1/4  | 0.001  |

---

Figure S1. Survey response report. Panel A reports the weekly response rate, calculated as the proportion of survey responses over the number of accesses to the survey website. The dotted line represents the overall response rate (84.5%). Panel B represents the number of responses per day. Panel C reports the number of website accesses per day. Panel D reports the number of accesses per region.

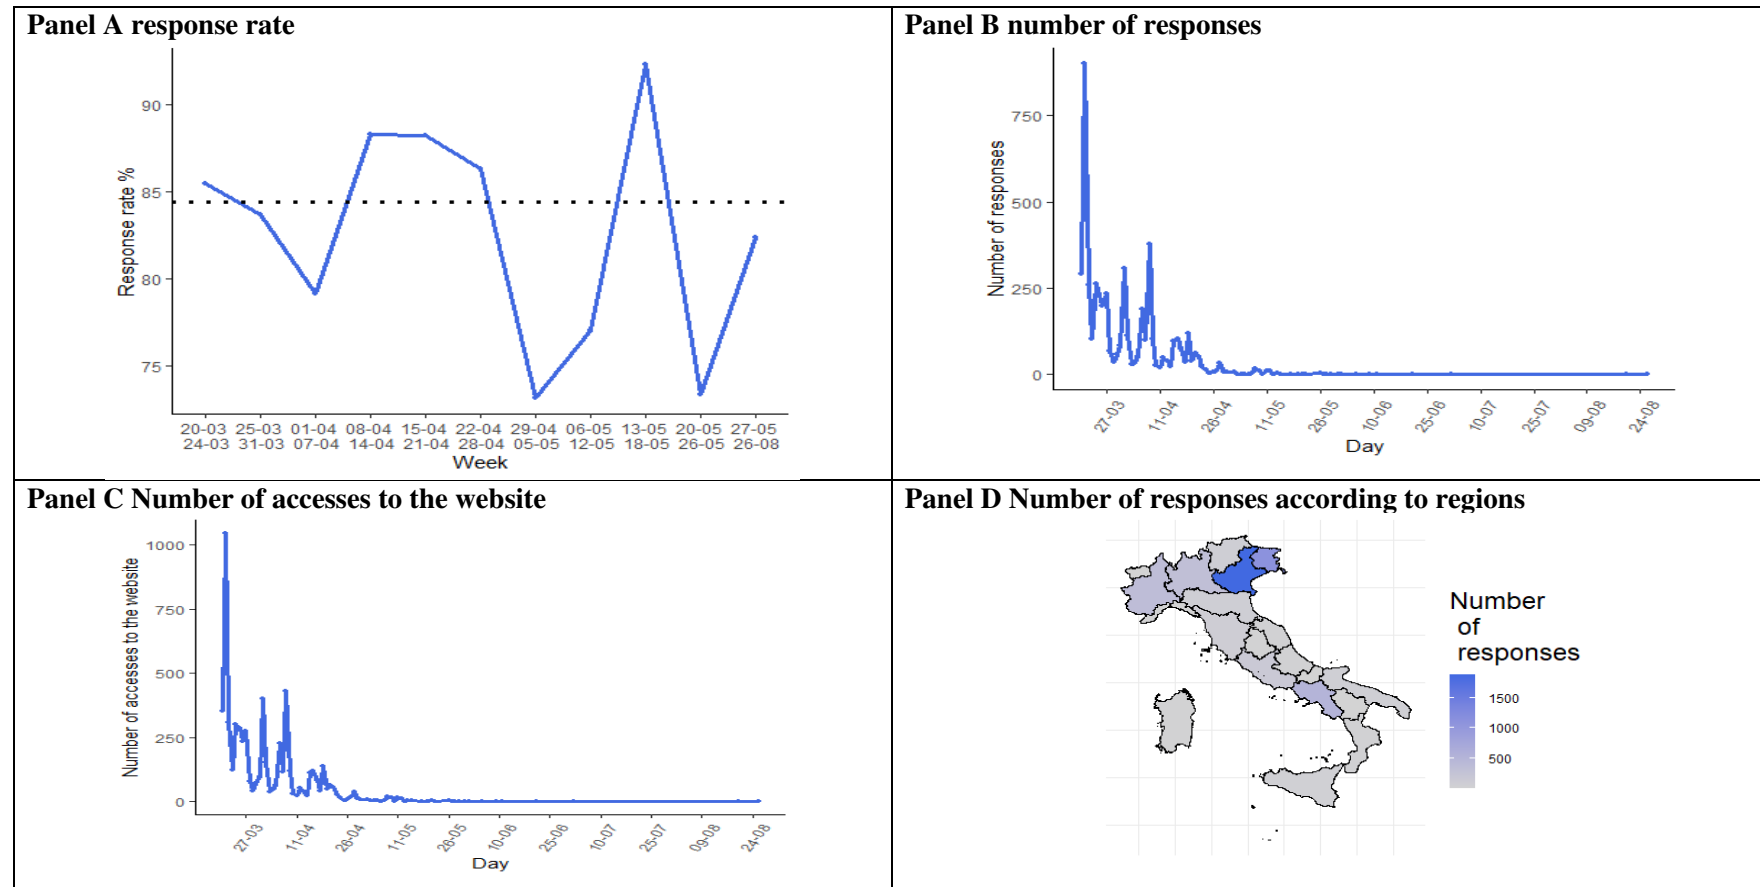

Figure S2. Missing Responses report. Percentage of missing responses per region. The dotted line represents the overall survey missing rate (29.9%)

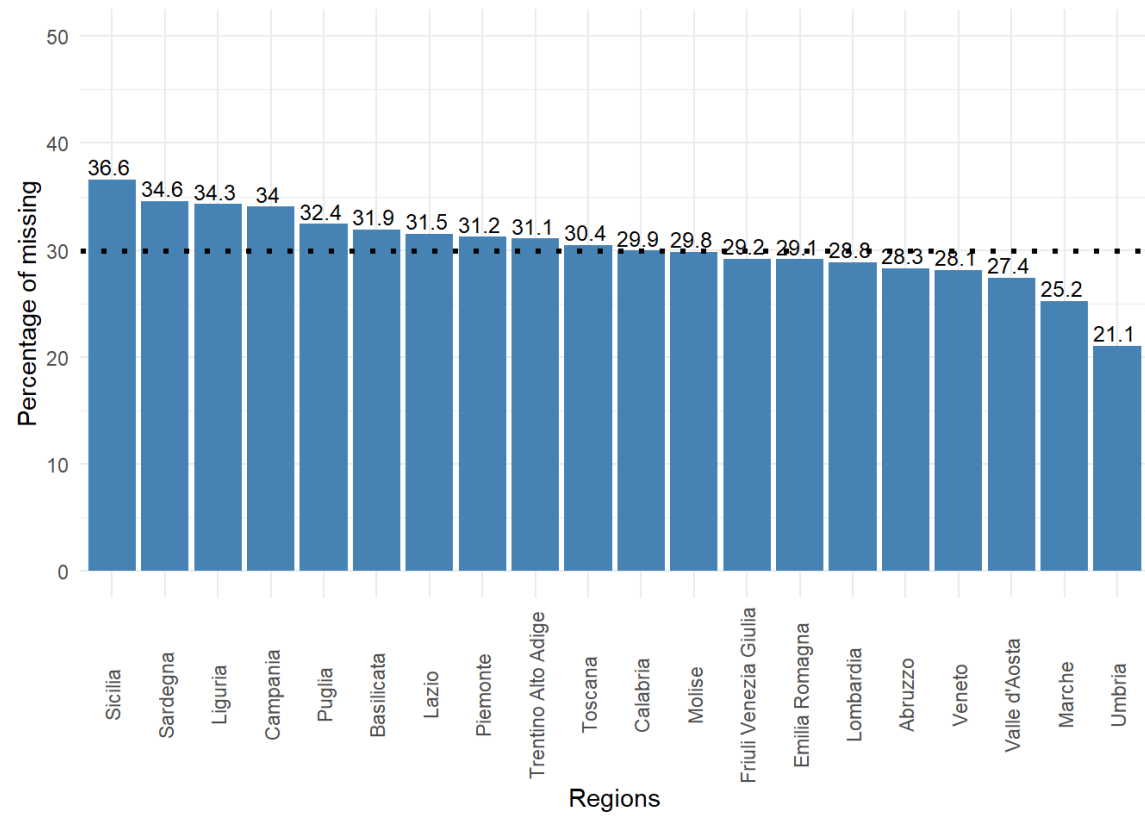

Supplement: bmjopen-2021-048916supp001.pdf [file bmjopen-2021-048916supp001.pdf]
