# Supplementary material for: Impact of the COVID-19 lockdown on psychological health and nutritional habits in Italy: results from the #PRESTOinsieme study
Source: PubMed Central journal article supplement — BMJ Open. 2022 Apr 5;12(4):e048916. doi: 10.1136/bmjopen-2021-048916 (PMC8983406; doi:10.1136/bmjopen-2021-048916), 2022-04-05
Supplement: bmjopen-2021-048916.draft_revisions.pdf [file bmjopen-2021-048916.draft_revisions.pdf]

# BMJ Open

BMJ Open is committed to open peer review. As part of this commitment we make the peer review history of every article we publish publicly available.

When an article is published we post the peer reviewers' comments and the authors' responses online. We also post the versions of the paper that were used during peer review. These are the versions that the peer review comments apply to.

The versions of the paper that follow are the versions that were submitted during the peer review process. They are not the versions of record or the final published versions. They should not be cited or distributed as the published version of this manuscript.

BMJ Open is an open access journal and the full, final, typeset and author-corrected version of record of the manuscript is available on our site with no access controls, subscription charges or pay-per-view fees (<http://bmjopen.bmj.com>).

If you have any questions on BMJ Open's open peer review process please email [info.bmjopen@bmj.com](mailto:info.bmjopen@bmj.com)

# BMJ Open

## Impact of lockdown against COVID-19 epidemic on psychological and nutritional habits in Italy: results from the #PRESTOinsieme study

|                               |                                                                                                                                                                                                                                                                                                                                                                                                                                                                                                                                                             |
|-------------------------------|-------------------------------------------------------------------------------------------------------------------------------------------------------------------------------------------------------------------------------------------------------------------------------------------------------------------------------------------------------------------------------------------------------------------------------------------------------------------------------------------------------------------------------------------------------------|
| Journal:                      | <i>BMJ Open</i>                                                                                                                                                                                                                                                                                                                                                                                                                                                                                                                                             |
| Manuscript ID                 | bmjopen-2021-048916                                                                                                                                                                                                                                                                                                                                                                                                                                                                                                                                         |
| Article Type:                 | Original research                                                                                                                                                                                                                                                                                                                                                                                                                                                                                                                                           |
| Date Submitted by the Author: | 12-Jan-2021                                                                                                                                                                                                                                                                                                                                                                                                                                                                                                                                                 |
| Complete List of Authors:     | Lorenzoni, Giulia; University of Padova<br>Azzolina, Danila; University of Padova; University of Oriental Piedmont<br>Maresio, Elisabetta; Psychotherapy Unit Prochild Onlus<br>Gallipoli, Silvia; Zeta Research Ltd<br>Ghidina, Marco; Zeta Research Ltd<br>Baldas, Solidea; Prochild Onlus<br>Berchiolla, Paola; Università degli Studi di Torino<br>Giron, Maria Cecilia; University of Padova<br>Silano, Marco; Istituto Superiore di Sanità, Unit of Human Nutrition and Health<br>Gregori, Dario; University of Padova School of Medicine and Surgery |
| Keywords:                     | COVID-19, NUTRITION & DIETETICS, Anxiety disorders < PSYCHIATRY, Public health < INFECTIOUS DISEASES                                                                                                                                                                                                                                                                                                                                                                                                                                                        |
|                               |                                                                                                                                                                                                                                                                                                                                                                                                                                                                                                                                                             |

SCHOLARONE™  
Manuscripts

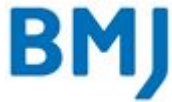

I, the Submitting Author has the right to grant and does grant on behalf of all authors of the Work (as defined in the below author licence), an exclusive licence and/or a non-exclusive licence for contributions from authors who are: i) UK Crown employees; ii) where BMJ has agreed a CC-BY licence shall apply, and/or iii) in accordance with the terms applicable for US Federal Government officers or employees acting as part of their official duties; on a worldwide, perpetual, irrevocable, royalty-free basis to BMJ Publishing Group Ltd ("BMJ") its licensees and where the relevant Journal is co-owned by BMJ to the co-owners of the Journal, to publish the Work in this journal and any other BMJ products and to exploit all rights, as set out in our [licence](#).

The Submitting Author accepts and understands that any supply made under these terms is made by BMJ to the Submitting Author unless you are acting as an employee on behalf of your employer or a postgraduate student of an affiliated institution which is paying any applicable article publishing charge ("APC") for Open Access articles. Where the Submitting Author wishes to make the Work available on an Open Access basis (and intends to pay the relevant APC), the terms of reuse of such Open Access shall be governed by a Creative Commons licence – details of these licences and which [Creative Commons](#) licence will apply to this Work are set out in our licence referred to above.

Other than as permitted in any relevant BMJ Author's Self Archiving Policies, I confirm this Work has not been accepted for publication elsewhere, is not being considered for publication elsewhere and does not duplicate material already published. I confirm all authors consent to publication of this Work and authorise the granting of this licence.

1  
2  
3 **Impact of lockdown against COVID-19 epidemic on psychological and nutritional habits in**  
4 **Italy: results from the #PRESTOinsieme study**  
5  
6

7 Giulia Lorenzoni <sup>1\*</sup>, Danila Azzolina <sup>1,2\*</sup>, Elisabetta Maresio<sup>3\*</sup>, Silvia Gallipoli <sup>4</sup>, Marco Ghidina <sup>4</sup>,  
8 Solidea Baldas <sup>8</sup>, Paola Berchiolla <sup>5</sup>, Maria Cecilia Giron <sup>6</sup>, Marco Silano <sup>7</sup>, Dario Gregori <sup>\*1</sup>, and the  
9 #PRESTOinsieme Study Group<sup>1</sup>  
10  
11

12  
13  
14 <sup>1</sup> Unit of Biostatistics, Epidemiology and Public Health, Department of Cardiac, Thoracic, Vascular  
15 Sciences, and Public Health, University of Padova, Padova, Italy  
16

17  
18  
19 <sup>2</sup> Department of Translation medicine, University of Oriental Piedmont, Novara, Italy  
20

21  
22 <sup>3</sup> Psychotherapy Unit, Prochild Onlus, Trieste, Italy  
23

24  
25 <sup>4</sup> Zeta Research Ltd., Trieste, Italy  
26

27  
28 <sup>5</sup> Department of Clinical and Biological Sciences, University of Turin, Turin, Italy  
29

30  
31 <sup>6</sup> Department of Pharmaceutical and Pharmacological Sciences, University of Padova, Padova, Italy  
32

33  
34 <sup>7</sup> Unit of Human Nutrition and Health, Department of Food Safety, Nutrition and Veterinary Public  
35 Health, Italian National Institute of Health, Rome, Italy  
36

37  
38 <sup>8</sup> Prochild Onlus, Trieste, Italy  
39

40  
41  
42 **Corresponding author:**  
43

44  
45 Prof. Dario Gregori, MA, Ph.D., FACN, FTOS  
46

47  
48 Unit of Biostatistics, Epidemiology and Public Health,  
49  
50

51  
52  
53  
54 

---

  
55 \*These authors should be considered equally first-authors

56 <sup>1</sup> #PRESTOinsieme Study Group: Elisabetta Maresio (Prochild Onlus), Marco Silano (Italian National Institute of Health), Dario Gregori (University  
57 of Padova), Giulia Lorenzoni (University of Padova), Nicolas Destro (University of Padova), Danila Azzolina (University of Piemonte Orientale),  
58 Corrado Lanera (University of Padova), Paola Berchiolla (University of Turin), Silvia Gallipoli (Zeta Research), Solidea Baldas (Prochild Onlus),  
59 Federica Zobec (Zeta Research), Marco Ghidina (Zeta Research)  
60

1  
2  
3  
4  
5  
6  
7  
8  
9  
10  
11  
12  
13  
14  
15  
16  
17  
18  
19  
20  
21  
22  
23  
24  
25  
26  
27  
28  
29  
30  
31  
32  
33  
34  
35  
36  
37  
38  
39  
40  
41  
42  
43  
44  
45  
46  
47  
48  
49  
50  
51  
52  
53  
54  
55  
56  
57  
58  
59  
60

Department of Cardiac, Thoracic, Vascular Sciences and Public Health,

University of Padova,

Via Loredan, 18

35131 Padova, Italy

Phone: +393473518231

Email: [dario.gregori@unipd.it](mailto:dario.gregori@unipd.it)

**Word count:** 2230

For peer review only

## Abstract

**Objectives.** The present work aims to present the results of the “*PRESTOinsieme*” (“*we’ll be together soon*” in English) project, a web-based survey ([www.prestoinsieme.com](http://www.prestoinsieme.com)) aimed at describing lifestyle habits and prevalence of psychological discomfort symptoms in the Italian population during the COVID-19 lockdown and at characterizing subjects presenting with impaired psychological discomfort.

**Design:** Web-based survey

**Setting:** Italy

**Participants:** Italian population older than 16 years of age

**Exposure:** The survey consisted of validated questionnaires.

**Main Outcomes and Measures:** Survey respondents’ psychological health and lifestyle habits.

**Results:** Survey respondents were 5008. Most of the respondents (88.6%) suffered from psychological distress and from moderate (25.5%, 1057 subjects) or severe (22%, 909 subjects) depressive symptoms. Lower age, female gender, being unemployed (OR 1.57, 95% C.I. 1.217-2.024) or being students (OR 1.726, 95% C.I. 1.306-2.28) were found to be predictors of more severe depressive symptoms.

**Conclusions.** Present results might be useful in facing the second wave of COVID-19, providing indications on the need to implement public programs of psychological support for the community.

**Keywords.** Italy; COVID-19; Lockdown; Dietary habits; Psychological distress

1  
2  
3  
4  
5  
6  
7  
8  
9  
10  
11  
12  
13  
14  
15  
16  
17  
18  
19  
20  
21  
22  
23  
24  
25  
26  
27  
28  
29  
30  
31  
32  
33  
34  
35  
36  
37  
38  
39  
40  
41  
42  
43  
44  
45  
46  
47  
48  
49  
50  
51  
52  
53  
54  
55  
56  
57  
58  
59  
60

### **Strengths and limitations of this study**

- The study is a web-based survey consisting of a set of validated questionnaires to assess Italian population's psychological wellbeing and lifestyle habits during the COVID-19 lockdown.
- The survey involves 5008 subjects aged over > 16 years and allows for the characterization of those subjects more vulnerable to the side effects of the lockdown.
- The survey was performed during the first COVID-19 lockdown in Italy; it would be interesting to collect data during the second Italian lockdown and compare them.

For peer review only

## Introduction

Containment measures (e.g., social distancing, national lockdown) are the critical public health strategies to fight the COVID-19 outbreak [1]. Even though such actions are essential to contain the COVID-19 epidemic, it is worth pointing out that they might affect physical [2] and psychological [3] health and seem to be associated with an increased risk of domestic accidents [4].

Italy is the first European country where the COVID-19 epidemic outbreak took place [5], causing an excess of mortality with severe overloads for the healthcare system [6,7]. The first containment measures have been introduced on the 23<sup>rd</sup> of February in the two Italian regions in which the epidemic outbreak has spread first (Veneto and Lombardia) [8]. However, in a short time, the epidemic outbreak has also spread in the other Italian regions, so that the Italian government has introduced new containment measures at the national level on the 11<sup>th</sup> of March. Finally, on the 22<sup>nd</sup> of March, the nationwide lockdown has been decided. Preliminary data on the Italian population during the lockdown show impaired emotional wellbeing and unhealthy lifestyle changes [9].

These days, some of the European countries initially most affected by COVID-19 are experiencing a second wave of the epidemic. We cannot rule out that severe containment measures might be introduced again to control the virus spread in the next few months.

Looking at preliminary data in the field, it appears to be of extreme importance to take appropriate public health actions to mitigate the adverse effects of lockdown [10]. Unfortunately, public health interventions may potentially favour the onset of severe side effects [11]. Containment measures leading to social distancing/isolation are even riskier, exposing or worsening people's vulnerabilities [12,13]. It would be of primary importance to identify population groups more vulnerable to potential side effects of lockdown to develop public health actions meant explicitly for these subjects [10].

The present work aims to present the results of the "*PRESTOinsieme*" ("*we'll be together soon*" in English) project, a web-based survey conducted in Italy. The study aims to describe lifestyle habits and prevalence of psychological discomfort symptoms in the Italian population during the COVID-19 lockdown and at characterizing subjects presenting with impaired psychological discomfort.

## Methods

The "*PRESTOinsieme*" (imPact of quaRantine mEasures againST cOvid19) project is a web-based survey open to volunteers older than 16 years of age ([www.prestoinsieme.com](http://www.prestoinsieme.com)). The project started in Italy on the 20<sup>th</sup> of March 2020 to assess the national lockdown effect on the population's psychological health and lifestyle habits.

### *Sampling strategy*



1  
2  
3 The survey was web-based, via Lime Survey [14], and disseminated via messaging apps (i.e.,  
4 WhatsApp and Telegram), and social networks (i.e., Instagram, Facebook, LinkedIn). Survey  
5 respondents were encouraged to spread the survey to their contacts, i.e., virtual snowball sampling.  
6  
7 Five thousand nine hundred and thirty survey accesses were registered during the study period; 5008  
8 responded (response rate: 89.45%). The response rate ranged between 70% and 95% during the study  
9 period (Figure S1, Panel A). Most of the survey accesses and survey responses were recorded until  
10 the end of the lockdown, i.e., the 3<sup>rd</sup> of May 2020 (Figure S1, Panel B, and C). The regions more  
11 affected by the outbreak (i.e., Lombardia, Veneto, Piemonte, Emilia-Romagna) provided the highest  
12 number of website accesses, except for Campania and Friuli Venezia Giulia (Figure S1, Panel D).  
13 Figure S2 reports the proportion of missing data for each region.  
14  
15  
16  
17  
18  
19

### 20 21 *Questionnaires*

22  
23 The survey consisted of validated questionnaires examining subjects' socio-demographic personal  
24 and household characteristics, psychological health, and lifestyle habits.

25  
26 For what concerns psychological health, three screening instruments, for psychological distress,  
27 depression, and post-traumatic stress, were administered. The General Health Questionnaire (GHQ-  
28 12) was used to screen for psychological distress. GHQ-12 was scored using the 4-point Likert  
29 method (0-1-2-3), with a threshold at 14 points to indicate psychological distress [15]. The Impact of  
30 Event Scale-Revised (IES-R) was used to screen for post-traumatic stress. According to a recent  
31 publication in the field [16], the total score of the IES-R was classified as following, 0–23 (normal),  
32 24–32 (mild psychological impact), 33–36 (moderate psychological impact), and  $\geq 37$  (severe  
33 psychological impact). Finally, the Center for Epidemiologic Studies Depression Scale (CES-D) was  
34 used to screen for depression, considering three classes of symptoms severity: 0-15 (no/mild  
35 depressive symptoms), 16-23 (moderate depressive symptoms), and 24-60 (severe depressive  
36 symptoms).  
37  
38

39 The lifestyle habits were assessed using a validated questionnaire routinely used in the Italian Food  
40 Consumption Survey (INRAN), asking about weekly food and physical activity frequency.  
41  
42  
43  
44

### 45 46 *Patient and Public Involvement*

47  
48 Not applicable  
49

### 50 51 *Statistical analysis*

52  
53 Continuous data were reported as median (I, III quartiles); categorical data were summarized as  
54 percentages and absolute frequencies. The Wilcoxon-type tests were performed for continuous  
55  
56  
57  
58  
59  
60

1  
2  
3 variables and the Pearson chi-square test, or Fisher exact test, whatever appropriate, for categorical  
4  
5 ones.

6 The categorized CES-D, IES-R, and GHQ-12 scores were considered as endpoints. A Proportional  
7  
8 Odds Model was estimated for the ordinal responses with more than two categories (CES-D and IES-  
9  
10 R). A Logistic regression model was estimated for the binary response variable (GHQ-12).

11 The variables to be included in the model were selected via the backward elimination method and  
12  
13 Akaike Information Criterion (AIC). The non-linear effects on the study outcome (i.e., respondents'  
14  
15 age and time effect) were included in the model using Restricted Cubic Splines (RCS). The model  
16  
17 estimated Odds Ratios (OR) together with the 95% confidence interval, and the p-values were  
18  
19 reported.

20 The computations were performed using the software R 4.0.2 [17] with the rms [18] package.

## 21 22 23 **Results**

24  
25 Survey respondents were 5008. The median age was 38 years, and the female gender was the most  
26  
27 prevalent (63%). For what concerns socioeconomic status, about half of the sample received  
28  
29 secondary education (52%), and two-thirds were active employees (67%).

30  
31 Table S1 (Supplementary Material) reports the analysis of respondents' socio-demographic  
32  
33 characteristics according to the place where they lived. Subjects living in areas with high COVID-19  
34  
35 incidence were significantly older and had a higher socioeconomic status than residents of regions  
36  
37 with low COVID-19 incidence. They were found to have received most often university education  
38  
39 and were more likely to have a job and to live in a single-family house with a garden.

### 40 41 *Psychological distress*

42  
43 Most of the survey respondents (88.6%) suffered from psychological distress (GHQ score  $\geq 14$ ). The  
44  
45 prevalence of psychological distress was significantly higher in females (p-value 0.049), unemployed  
46  
47 (p-value 0.001), and in those who did not perform physical activity (p-value  $< 0.001$ ) (Table 1). The  
48  
49 results were confirmed at the multivariable analysis (Table 4). Unemployed/retired/homemakers were  
50  
51 found to be at significantly higher risk for psychological distress compared to active employees (OR  
52  
53 2.00, 95% C.I. 1.4-2.85), together with females (OR 0.77 95% CI 0.63-0.94, male vs. female).

### 54 55 *Depression*

56  
57 Half of the sample suffered from moderate (25.5%, 1057 subjects) or severe (22%, 909 subjects)  
58  
59 depressive symptoms. At univariable analysis (Table 2), young women were significantly more likely  
60  
to suffer from severe depressive symptoms (median age of 29 years of subjects with severe symptoms

1  
2  
3 vs. median age of 43 and 34 years of subjects with no or moderate depressive symptoms, respectively,  
4 p-value <0.001). In addition to that, subjects living in multi-family houses/single-room apartments  
5 without a garden were significantly more likely to suffer more frequently from moderate/severe  
6 symptoms of depression. In line with univariable analysis, lower age (OR 0.39 for interquartile range  
7 (IQR) 26-54, 95% C.I. 0.32-0.48), female gender, being unemployed/retired/homemaker (OR 1.57,  
8 95% C.I. 1.22-2.02) or being students (OR 1.73, 95% C.I. 1.31-2.28) were found to be significant  
9 predictors of more severe depressive symptoms (Table 4). Also, subjects who lived alone (OR 1.50  
10 95% C.I. 1.17-1.91) and experienced a loss (OR 1.34, 95% C.I. 1.05-1.73) were found to be  
11 significantly more likely to suffer from depressive symptoms. Conversely, doing physical activity  
12 was found to be protective against worse depressive symptoms (OR 0.64, 95% C.I. 0.55-0.75).

### 21 *Post-traumatic stress*

22  
23 The prevalence of moderate and severe psychological impact was of 5.6% and 17.7%, respectively.  
24 As for moderate/severe depressive symptoms, the prevalence of moderate/severe psychological  
25 impact was significantly higher in females, younger subjects, and in subjects living in multi-family  
26 houses and single-room apartments (Table 3). The multivariable analysis confirmed such results  
27 (Table 4).

### 32 *Dietary habits*

33  
34 Overall, subjects reported eating pasta/rice/cereals and cereal-based products a median of 7 times per  
35 week. The meat was reported more frequently than fish (median of 3 times per week vs median of 2  
36 times per week, respectively), while the consumption of legumes was reported to be a median of 2  
37 times per week. The consumption of fruits and vegetables was of a median of 7 times per week each.  
38 The analysis of dietary habits according to psychological wellbeing (Tables 1-2-3) scales shows no  
39 statistically significant differences for GHQ scores, except for vegetables and legumes consumption  
40 (significantly lower for subjects with psychological distress, p-value 0.002). Subjects with  
41 moderate/severe depressive symptoms were found to eat less frequently milk-based products  
42 (<0.001), fruit (<0.001), dried fruit (<0.001), and vegetables (0.013). Conversely, they were  
43 significantly more likely to eat more frequently foods high in fat and sugar (p-value 0.008). Similarly,  
44 subjects with moderate/severe psychological impact showed a lower consumption of fruit (p-value  
45 0.003). At the same time, they were more likely to eat more frequently foods high in fat and sugar (p-  
46 value 0.012).

## 59 **Discussion**

1  
2  
3 Present findings show a high prevalence of moderate/severe depressive symptoms during the  
4 lockdown. The characterization of such subjects showed that female students and  
5 unemployed/retired/homemaker people living in a multi-family house without a garden are at higher  
6 risk of moderate/severe depressive symptoms. Conversely, only a small proportion of subjects  
7 reported to suffer from moderate/severe psychological impact, and, again, females of young age and  
8 unemployed/retired/homemakers were the most affected.  
9

10 A recent review in the field has shown that, in the short term, quarantine is associated with an  
11 increased prevalence of anxiety, depression, and post-traumatic stress symptoms [19]. Such findings  
12 are confirmed by surveys conducted in the most affected countries during the COVID-19 lockdown,  
13 showing that the population presented with increased feels of anxiety and depression [9,16].  
14 Furthermore, emotional eating has been frequently reported [20], highlighting the strong association  
15 between psychological wellbeing and lifestyle habits, which have been profoundly affected by the  
16 lockdown [21]. Surveyed people have reported doing less physical activity and snacking more  
17 frequently during the lockdown, with consequent weight gain [22,23]. Worryingly, such changes have  
18 been shown to affect also children [24] with potentially detrimental consequences for their health  
19 since we cannot rule out that such changes in lifestyle habits could result in an increased risk for  
20 noncommunicable diseases in the long run.  
21

22 The prevalence of moderate/severe depressive symptoms was found to be higher compared to a recent  
23 metanalysis in the field, i.e., prevalence of 33.7% [3]. However, when only severe depressive  
24 symptoms are considered, the prevalence is consistent with previous studies in the field [3].  
25 Conversely, the prevalence of moderate/severe symptoms of post-traumatic stress was found to be  
26 lower than those reported in the literature [16,25,26], especially when only severe psychological  
27 impact is considered. In discussing such data, it is worth pointing out that studies in the field have  
28 employed different tools to ascertain the prevalence of depression, anxiety, and post-traumatic stress,  
29 making it difficult to compare results from other studies.  
30

31 For what concerns the characterization of depressed subjects, in line with literature in the field, female  
32 gender, low socioeconomic status [27], younger age, and being students [28] were found to be  
33 significant predictors of depression.  
34

### 35 *Dietary habits*

36 The study of dietary habits during the lockdown showed that subjects were not compliant with the  
37 Mediterranean pyramid targets [29]. Half of the sample reported eating fruits and vegetables only  
38 twice a day, even though their consumption is recommended five times a day. In addition to that,  
39 subjects report to eating food high in fat and sugars (e.g., cakes) a median of 3 times a week  
40

1  
2  
3 (interquartile range 2-7), meaning that 25% of the sample eat such foods once a day, even though  
4 their consumption is recommended to be occasional. Such findings are in line with literature in the  
5 field, demonstrating that subjects tend to snack more frequently during the lockdown [22]. Fish  
6 consumption is recommended to be three times per week, while participants report eating fish a  
7 median of 2 times per week, we cannot rule out that the lockdown might pose difficulties in the fish  
8 purchase.  
9

10  
11  
12 Interestingly, dietary patterns were found to be even worse in subjects with symptoms of depression  
13 and psychological impact. They were found to eat more frequently foods high in fat and sugar and to  
14 eat less frequently fruits and vegetables compared to subjects without symptoms of  
15 depression/psychological impact. Such finding could be interpreted as emotional eating that has been  
16 reported during the lockdown, showing that subjects suffering from anxiety and depressive symptoms  
17 referred to be more prone to emotional eating habits [20]. However, we can also hypothesize that  
18 subjects with psychological discomfort had worse eating habits because of a worse socioeconomic  
19 status since they were more likely not to have a job and to live in a smaller house without a garden.  
20 However, we cannot clear the issue since we did not investigate eating habits before the lockdown  
21 that is a study limitation.  
22  
23

24  
25 Present results might be useful in facing the second wave of COVID-19, which is ongoing in almost  
26 all European countries. Such indications may provide data to implement public psychological support  
27 programs for the community if new containment measures should be introduced to face the second  
28 wave of COVID-19. Together with psychological support programs, diet and lifestyle should also be  
29 targeted by public health strategies to limit the long-term impact of the lockdown.  
30  
31  
32  
33  
34  
35  
36  
37  
38  
39  
40  
41  
42  
43  
44  
45  
46  
47  
48  
49  
50  
51  
52  
53  
54  
55  
56  
57  
58  
59  
60

1  
2  
3 **Author contributorship.** DG conception of the work; DG, EM, MS design of the work; SG, SB, and  
4  
5 MG data acquisition; DA data analysis; GL interpretation of results and draft of the work; PB and  
6  
7 MCG substantial revision of the work.  
8  
9

10 **Funding.** This research received no specific grant from any funding agency in the public, commercial  
11  
12 or not-for-profit sectors.  
13

14 **Competing interest.** None declared  
15

16  
17 **Data sharing.** The datasets used and/or analysed during the current study are available from the  
18  
19 corresponding author on reasonable request  
20

21 **Patient consent.** Not applicable  
22

23  
24 **Ethical approval.** Not applicable  
25  
26  
27  
28  
29  
30  
31  
32  
33  
34  
35  
36  
37  
38  
39  
40  
41  
42  
43  
44  
45  
46  
47  
48  
49  
50  
51  
52  
53  
54  
55  
56  
57  
58  
59  
60

1  
2  
3  
4  
5  
6  
7  
8  
9  
10  
11  
12  
13  
14  
15  
16  
17  
18  
19  
20  
21  
22  
23  
24  
25  
26  
27  
28  
29  
30  
31  
32  
33  
34  
35  
36  
37  
38  
39  
40  
41  
42  
43  
44  
45  
46  
47  
48  
49  
50  
51  
52  
53  
54  
55  
56  
57  
58  
59  
60

## References

- 1 Anderson RM, Heesterbeek H, Klinkenberg D, *et al.* How will country-based mitigation measures influence the course of the COVID-19 epidemic? *The Lancet* 2020.
- 2 Tona F, Plebani M, Gregori D, *et al.* “Stay home stay safe?” Systemic inflammation in subjects undergoing routine hematology tests during the lockdown period of COVID-19. *Clin Chem Lab Med CCLM* 2020;**1**.
- 3 Salari N, Hosseini-Far A, Jalali R, *et al.* Prevalence of stress, anxiety, depression among the general population during the COVID-19 pandemic: a systematic review and meta-analysis. *Glob Health* 2020;**16**:1–11.
- 4 Bressan S, Gallo E, Tirelli F, *et al.* Lockdown: more domestic accidents than COVID-19 in children. *Arch Dis Child* 2020.
- 5 Gregori D, Azzolina D, Lanera C, *et al.* A first estimation of the impact of public health actions against COVID-19 in Veneto (Italy). *J Epidemiol Community Health* Published Online First: 2020. doi:10.1136/jech-2020-214209
- 6 Magnani C, Azzolina D, Gallo E, *et al.* How Large Was the Mortality Increase Directly and Indirectly Caused by the COVID-19 Epidemic? An Analysis on All-Causes Mortality Data in Italy. *Int J Environ Res Public Health* 2020;**17**:3452. doi:10.3390/ijerph17103452
- 7 Azzolina D, Magnani C, Gallo E, *et al.* Gender and age factors affecting the mortality during the COVID-19 epidemic in Italy. *Epidemiol Prev* 2020;**ND (in Press)**.
- 8 Lorenzoni G, Lanera C, Azzolina D, *et al.* Is a more aggressive COVID-19 case detection approach mitigating the burden on ICUs? Some reflections from Italy. *Crit Care* 2020;**24**:1–2.
- 9 Di Renzo L, Gualtieri P, Cinelli G, *et al.* Psychological Aspects and Eating Habits during COVID-19 Home Confinement: Results of EHLC-COVID-19 Italian Online Survey. *Nutrients* 2020;**12**:2152.
- 10 Bavli I, Sutton B, Galea S. Harms of public health interventions against covid-19 must not be ignored. *bmj* 2020;**371**.
- 11 Lorenc T, Oliver K. Adverse effects of public health interventions: a conceptual framework. *J Epidemiol Community Health* 2014;**68**:288–90.
- 12 Boserup B, McKenney M, Elkbuli A. Alarming trends in US domestic violence during the COVID-19 pandemic. *Am J Emerg Med* 2020.
- 13 Hooper MW, Nápoles AM, Pérez-Stable EJ. COVID-19 and racial/ethnic disparities. *Jama* 2020.
- 14 Schmitz C. LimeSurvey: An open source survey tool. *LimeSurvey Proj Hambg Ger URL Httpwww Limesurvey Org* 2012.
- 15 Giorgi G, Perez JML, D’Antonio AC, *et al.* The general health questionnaire (GHQ-12) in a sample of italian workers: mental health at individual and organizational level. *World J Med Sci* 2014;**11**:47–56.

- 1  
2  
3 16 Wang C, Pan R, Wan X, *et al.* Immediate psychological responses and associated factors during  
4 the initial stage of the 2019 coronavirus disease (COVID-19) epidemic among the general  
5 population in china. *Int J Environ Res Public Health* 2020;**17**:1729.  
6  
7  
8 17 R Core Team (2019). *R: A language and environment for statistical computing*. R Foundation  
9 for Statistical Computing, Vienna, Austria. <https://www.R-project.org>  
10  
11 18 Harrell FEJ. rms: Regression Modeling Strategies. R package version 4.1-3. Published Online  
12 First: 2014.<http://CRAN.R-project.org/package=rms>  
13  
14 19 Brooks SK, Webster RK, Smith LE, *et al.* The psychological impact of quarantine and how to  
15 reduce it: rapid review of the evidence. *The Lancet* 2020.  
16  
17 20 Cherikh F, Frey S, Bel C, *et al.* Behavioral food addiction during lockdown: time for awareness,  
18 time to prepare the aftermath. *Obes Surg* 2020;**1**:1.  
19  
20 21 Monzani A, Lionetti E, Felici E, *et al.* Adherence to the Gluten-Free Diet during the Lockdown  
21 for COVID-19 Pandemic: A Web-Based Survey of Italian Subjects with Celiac Disease.  
22 *Nutrients* 2020;**12**:3467. doi:10.3390/nu12113467  
23  
24 22 Sidor A, Rzymiski P. Dietary Choices and Habits during COVID-19 Lockdown: Experience  
25 from Poland. *Nutrients* 2020;**12**:1657.  
26  
27 23 Scarmozzino F, Visioli F. Covid-19 and the Subsequent Lockdown Modified Dietary Habits of  
28 Almost Half the Population in an Italian Sample. *Foods* 2020;**9**:675.  
29  
30 24 Pietrobelli A, Pecoraro L, Ferruzzi A, *et al.* Effects of COVID-19 lockdown on lifestyle  
31 behaviors in children with obesity living in Verona, Italy: a longitudinal study. *Obesity* 2020.  
32  
33 25 Karatzias T, Shevlin M, Murphy J, *et al.* Posttraumatic Stress Symptoms and Associated  
34 Comorbidity During the COVID-19 Pandemic in Ireland: A Population-Based Study. *J Trauma*  
35 *Stress* 2020;**33**:365–70.  
36  
37 26 Fawaz K, Smith MJ, Moises C, *et al.* Single-stage anterior high sacrectomy for locally recurrent  
38 rectal cancer. *Spine* 2014;**39**:443–52. doi:10.1097/BRS.0000000000000154  
39  
40 27 Ettman CK, Abdalla SM, Cohen GH, *et al.* Prevalence of Depression Symptoms in US Adults  
41 Before and During the COVID-19 Pandemic. *JAMA Netw Open* 2020;**3**:e2019686–e2019686.  
42  
43 28 Solomou I, Constantinidou F. Prevalence and predictors of anxiety and depression symptoms  
44 during the COVID-19 pandemic and compliance with precautionary measures: Age and sex  
45 matter. *Int J Environ Res Public Health* 2020;**17**:4924.  
46  
47 29 CREA, Centro di ricerca alimenti e nutrizione. *Dietary Guidelines for Healthy Eating– Revision*  
48 *2018 (Italian: Linee Guida per una sana alimentazione - Revisione 2018)*. 2018.  
49 [https://www.crea.gov.it/documents/59764/0/LINEE-GUIDA+DEFINITIVO+\(1\).pdf/3c13ff3d-](https://www.crea.gov.it/documents/59764/0/LINEE-GUIDA+DEFINITIVO+(1).pdf/3c13ff3d-74dc-88d7-0985-4678aec18537?t=1579191262173)  
50 [74dc-88d7-0985-4678aec18537?t=1579191262173](https://www.crea.gov.it/documents/59764/0/LINEE-GUIDA+DEFINITIVO+(1).pdf/3c13ff3d-74dc-88d7-0985-4678aec18537?t=1579191262173) (accessed 6 Apr 2020).  
51  
52  
53  
54  
55  
56  
57  
58  
59  
60



Table 1. Respondents characteristics and habits according to GHQ score;  $\geq 14$  (psychological distress)

|                                        | N    | 0-13<br>(N=507) | 14-36<br>(N=3931) | Combined<br>(N=4438) | P-value |
|----------------------------------------|------|-----------------|-------------------|----------------------|---------|
| Age                                    | 4438 | 26/34/48        | 26/38/53          | 26/37/53             | <0.001  |
| Gender: Female                         | 4438 | 59% (300)       | 64% (2502)        | 63% (2802)           | 0.049   |
| Male                                   |      | 41% (207)       | 36% (1429)        | 37% (1636)           |         |
| Nationality: Other                     | 4438 | 2% (8)          | 1% (53)           | 1% (61)              | 0.676   |
| Italian                                |      | 98% (499)       | 99% (3878)        | 99% (4377)           |         |
| Region: High COVID-19 incidence        | 4427 | 48% (242)       | 45% (1780)        | 46% (2022)           | 0.282   |
| Low COVID-19 incidence                 |      | 52% (263)       | 55% (2142)        | 54% (2405)           |         |
| Educational level: Secondary education | 4438 | 49% (249)       | 47% (1831)        | 47% (2080)           | 0.493   |
| University education                   |      | 50% (256)       | 53% (2089)        | 53% (2345)           |         |
| Primary education                      |      | 0% (2)          | 0% (11)           | 0% (13)              |         |
| Working status: Active employee        | 4438 | 71% (360)       | 67% (2630)        | 67% (2990)           | 0.001   |
| Unemployed/Retired/Homemaker           |      | 8% (42)         | 14% (568)         | 14% (610)            |         |
| Student                                |      | 21% (105)       | 19% (733)         | 19% (838)            |         |
| House type: Multi-family house         | 4438 | 64% (325)       | 66% (2589)        | 66% (2914)           | 0.221   |
| Single room apartment                  |      | 3% (16)         | 2% (79)           | 2% (95)              |         |
| Single-family house                    |      | 33% (166)       | 32% (1263)        | 32% (1429)           |         |
| Garden: No                             | 4438 | 39% (198)       | 42% (1658)        | 42% (1856)           | 0.18    |
| Yes                                    |      | 61% (309)       | 58% (2273)        | 58% (2582)           |         |
| Nasopharyngeal swab: No                | 2873 | 96% (278)       | 93% (2391)        | 93% (2669)           | 0.038   |
| Yes                                    |      | 4% (12)         | 7% (192)          | 7% (204)             |         |
| Recent loss: No                        | 2858 | 91% (266)       | 89% (2289)        | 89% (2555)           | 0.24    |
| Yes                                    |      | 9% (25)         | 11% (278)         | 11% (303)            |         |
| Living alone: No                       | 4438 | 88% (448)       | 88% (3469)        | 88% (3917)           | 0.939   |
| Yes                                    |      | 12% (59)        | 12% (462)         | 12% (521)            |         |
| Pet: No                                | 4438 | 54% (274)       | 54% (2112)        | 54% (2386)           | 0.893   |
| Yes                                    |      | 46% (233)       | 46% (1819)        | 46% (2052)           |         |
| Physical activity: No                  | 3991 | 44% (203)       | 57% (2024)        | 56% (2227)           | <0.001  |

| Yes                                          | 56% ( 259) | 43% (1505) | 44% (1764) |        |       |
|----------------------------------------------|------------|------------|------------|--------|-------|
| <b>Dietary habits (weekly consumption)</b>   |            |            |            |        |       |
| Pasta, Rice, Cereals                         | 3987       | 5/7/10     | 5/7/10     | 5/7/10 | 0.705 |
| Cereal-based products                        | 3984       | 3/7/7      | 4/7/7      | 3/7/7  | 0.214 |
| Raw meat                                     | 3985       | 2/3/4      | 2/3/4      | 2/3/4  | 0.299 |
| Cured meat                                   | 3981       | 1/2/3      | 1/2/3      | 1/2/3  | 0.05  |
| Fish                                         | 3985       | 1/2/2      | 1/2/2      | 1/2/2  | 0.864 |
| Milk and yogurt                              | 3982       | 2/7/7      | 2/7/7      | 2/7/7  | 0.971 |
| Milk-based products                          | 3984       | 2/3/5      | 2/3/5      | 2/3/5  | 0.675 |
| Fruit                                        | 3985       | 4/7/10     | 4/7/10     | 4/7/10 | 0.699 |
| Dried fruit                                  | 3981       | 0/2/5      | 0/2/5      | 0/2/5  | 0.249 |
| Vegetables                                   | 3984       | 6/7/14     | 6/7/14     | 6/7/14 | 0.003 |
| Legumes                                      | 3982       | 1/2/5      | 1/2/4      | 1/2/4  | 0.002 |
| Eggs                                         | 3984       | 1/2/3      | 1/2/2      | 1/2/2  | 0.1   |
| Food high in fat and sugar                   | 3980       | 1/3/6      | 2/4/7      | 2/3/7  | 0.158 |
| Soft drinks                                  | 3979       | 0/0/1      | 0/0/1      | 0/0/1  | 0.478 |
| Alcoholic drinks (e.g., wine, beer, spirits) | 3981       | 0/1/3      | 0/1/4      | 0/1/4  | 0.08  |

Table 2. Respondents characteristics and habits according to CES-D score; 0-15 (no/mild depressive symptoms), 16-23 (moderate depressive symptoms), and 24-60 (severe depressive symptoms)

|                                        | N    | 0-15<br>(N=2179) | 16-23<br>(N=1057) | 24-60<br>(N=909) | Combined<br>(N=4145) | P-value |
|----------------------------------------|------|------------------|-------------------|------------------|----------------------|---------|
| Age                                    | 4145 | 29/43/57         | 25/34/50          | 23/29/44         | 26/37/53             | <0.001  |
| Gender: Female                         | 4145 | 53% (1165)       | 70% (740)         | 80% (729)        | 64% (2634)           | <0.001  |
| Male                                   |      | 47% (1014)       | 30% (317)         | 20% (180)        | 36% (1511)           |         |
| Nationality: Other                     | 4145 | 1% (27)          | 2% (17)           | 1% (9)           | 1% (53)              | 0.464   |
| Italian                                |      | 99% (2152)       | 98% (1040)        | 99% (900)        | 99% (4092)           |         |
| Region: High COVID-19 incidence        | 4135 | 45% (976)        | 44% (464)         | 48% (431)        | 45% (1871)           | 0.258   |
| Low COVID-19 incidence                 |      | 55% (1200)       | 56% (589)         | 52% (475)        | 55% (2264)           |         |
| Educational level: Secondary education | 4145 | 45% (976)        | 44% (464)         | 52% (476)        | 46% (1916)           | <0.001  |
| University education                   |      | 55% (1196)       | 56% (593)         | 47% (431)        | 54% (2220)           |         |
| Primary education                      |      | 0% (7)           | 0% (0)            | 0% (2)           | 0% (9)               |         |
| Working status: Active employee        | 4145 | 73% (1583)       | 67% (709)         | 57% (521)        | 68% (2813)           | <0.001  |
| Unemployed/Retired/Homemaker           |      | 16% (338)        | 12% (130)         | 12% (111)        | 14% (579)            |         |
| Student                                |      | 12% (258)        | 21% (218)         | 30% (277)        | 18% (753)            |         |
| House type: Multi-family house         | 4145 | 63% (1369)       | 68% (715)         | 69% (628)        | 65% (2712)           | 0.001   |
| Single room apartment                  |      | 2% (40)          | 2% (23)           | 3% (25)          | 2% (88)              |         |
| Single-family house                    |      | 35% (770)        | 30% (319)         | 28% (256)        | 32% (1345)           |         |
| Garden: No                             | 4145 | 36% (781)        | 44% (467)         | 52% (475)        | 42% (1723)           | <0.001  |
| Yes                                    |      | 64% (1398)       | 56% (590)         | 48% (434)        | 58% (2422)           |         |
| Nasopharyngeal swab: No                | 2684 | 92% (1223)       | 92% (612)         | 95% (660)        | 93% (2495)           | 0.023   |
| Yes                                    |      | 8% (106)         | 8% (50)           | 5% (33)          | 7% (189)             |         |
| Recent loss: No                        | 2665 | 90% (1194)       | 89% (584)         | 88% (606)        | 89% (2384)           | 0.277   |
| Yes                                    |      | 10% (127)        | 11% (73)          | 12% (81)         | 11% (281)            |         |
| Living alone: No                       | 4145 | 89% (1937)       | 89% (937)         | 86% (778)        | 88% (3652)           | 0.029   |
| Yes                                    |      | 11% (242)        | 11% (120)         | 14% (131)        | 12% (493)            |         |
| Pet: No                                | 4145 | 54% (1179)       | 53% (565)         | 52% (470)        | 53% (2214)           | 0.475   |
| Yes                                    |      | 46% (1000)       | 47% (492)         | 48% (439)        | 47% (1931)           |         |

|    |                                              |      |            |           |           |            |        |
|----|----------------------------------------------|------|------------|-----------|-----------|------------|--------|
| 1  |                                              |      |            |           |           |            |        |
| 2  | Physical activity: No                        | 3991 | 53% (1123) | 56% (573) | 61% (531) | 56% (2227) | 0.001  |
| 3  | Yes                                          |      | 47% (981)  | 44% (445) | 39% (338) | 44% (1764) |        |
| 4  | <hr/>                                        |      |            |           |           |            |        |
| 5  | <i>Dietary habits (weekly consumption)</i>   |      |            |           |           |            |        |
| 6  | Pasta, Rice, Cereals                         | 3987 | 5/7/10     | 5/7/10    | 5/7/10    | 5/7/10     | 0.182  |
| 7  | Cereal-based products                        | 3984 | 3/7/7      | 4/7/7     | 4/7/7     | 3/7/7      | 0.135  |
| 8  | Raw meat                                     | 3985 | 2/3/4      | 2/3/4     | 2/3/4     | 2/3/4      | 0.418  |
| 9  | Cured meat                                   | 3981 | 1/2/3      | 1/2/3     | 1/2/3     | 1/2/3      | 0.243  |
| 10 | Fish                                         | 3985 | 1/2/2      | 1/2/2     | 1/2/2     | 1/2/2      | 0.003  |
| 11 | Milk and yogurt                              | 3982 | 1/7/7      | 2/7/7     | 2/7/7     | 2/7/7      | 0.309  |
| 12 | Milk-based products                          | 3984 | 2/3/5.25   | 2/3/5     | 1/3/5     | 2/3/5      | <0.001 |
| 13 | Fruit                                        | 3985 | 5/7/12     | 3/7/10    | 3/7/10    | 4/7/10     | <0.001 |
| 14 | Dried fruit                                  | 3981 | 0/2/5      | 0/2/5     | 0/1/4     | 0/2/5      | <0.001 |
| 15 | Vegetables                                   | 3984 | 6/7/14     | 5/7/14    | 5/7/14    | 6/7/14     | 0.013  |
| 16 | Legumes                                      | 3982 | 1/3/4      | 2/3/4     | 1/2/4     | 1/3/4      | 0.059  |
| 17 | Eggs                                         | 3984 | 1/2/2      | 1/2/2     | 1/2/2     | 1/2/2      | 0.442  |
| 18 | Food high in fat and sugar                   | 3980 | 1/3/6      | 2/4/7     | 2/4/7     | 2/3/7      | 0.008  |
| 19 | Soft drinks                                  | 3979 | 0/0/1      | 0/0/1     | 0/0/1     | 0/0/1      | 0.002  |
| 20 | Alcoholic drinks (e.g., wine, beer, spirits) | 3981 | 0/2/5      | 0/1/4     | 0/1/3     | 0/1/4      | <0.001 |
| 21 | <hr/>                                        |      |            |           |           |            |        |
| 22 |                                              |      |            |           |           |            |        |
| 23 |                                              |      |            |           |           |            |        |
| 24 |                                              |      |            |           |           |            |        |
| 25 |                                              |      |            |           |           |            |        |
| 26 |                                              |      |            |           |           |            |        |
| 27 |                                              |      |            |           |           |            |        |
| 28 |                                              |      |            |           |           |            |        |
| 29 |                                              |      |            |           |           |            |        |
| 30 |                                              |      |            |           |           |            |        |
| 31 |                                              |      |            |           |           |            |        |
| 32 |                                              |      |            |           |           |            |        |
| 33 |                                              |      |            |           |           |            |        |
| 34 |                                              |      |            |           |           |            |        |
| 35 |                                              |      |            |           |           |            |        |
| 36 |                                              |      |            |           |           |            |        |
| 37 |                                              |      |            |           |           |            |        |
| 38 |                                              |      |            |           |           |            |        |
| 39 |                                              |      |            |           |           |            |        |
| 40 |                                              |      |            |           |           |            |        |
| 41 |                                              |      |            |           |           |            |        |
| 42 |                                              |      |            |           |           |            |        |
| 43 |                                              |      |            |           |           |            |        |
| 44 |                                              |      |            |           |           |            |        |
| 45 |                                              |      |            |           |           |            |        |
| 46 |                                              |      |            |           |           |            |        |

Table 3. Respondents characteristics and habits according to IESD-R score; 0–23 (normal), 24–32 (mild psychological impact), 33–36 (moderate psychological impact), and  $\geq 37$  (severe psychological impact)

|                                        | N    | 0-23<br>(N=2463) | 24-32<br>(N=827) | 33-36<br>(N=242) | $\geq 37$<br>(N=762) | Combined<br>(N=4294) | P-value |
|----------------------------------------|------|------------------|------------------|------------------|----------------------|----------------------|---------|
| Age                                    | 4294 | 27/40/55         | 26/37/53         | 25/33/49         | 25/33/47             | 26/37/53             | <0.001  |
| Gender: Female                         | 4294 | 52% (1279)       | 73% (600)        | 85% (205)        | 83% (633)            | 63% (2717)           | <0.001  |
| Male                                   |      | 48% (1184)       | 27% (227)        | 15% (37)         | 17% (129)            | 37% (1577)           |         |
| Nationality: Other                     | 4294 | 1% (30)          | 1% (12)          | 1% (3)           | 1% (10)              | 1% (55)              | 0.965   |
| Italian                                |      | 99% (2433)       | 99% (815)        | 99% (239)        | 99% (752)            | 99% (4239)           |         |
| Region: High COVID-19 incidence        | 4284 | 44% (1090)       | 47% (385)        | 48% (115)        | 47% (357)            | 45% (1947)           | 0.377   |
| Low COVID-19 incidence                 |      | 56% (1370)       | 53% (440)        | 52% (127)        | 53% (400)            | 55% (2337)           |         |
| Educational level: Secondary education | 4294 | 44% (1087)       | 48% (397)        | 50% (121)        | 51% (390)            | 46% (1995)           | 0.009   |
| University education                   |      | 56% (1368)       | 52% (430)        | 50% (120)        | 48% (369)            | 53% (2287)           |         |
| Primary education                      |      | 0% (8)           | 0% (0)           | 0% (1)           | 0% (3)               | 0% (12)              |         |
| Working status: Active employee        | 4294 | 70% (1720)       | 66% (543)        | 62% (151)        | 65% (494)            | 68% (2908)           | 0.001   |
| Unemployed/Retired/Homemaker           |      | 14% (349)        | 14% (115)        | 14% (34)         | 13% (100)            | 14% (598)            |         |
| Student                                |      | 16% (394)        | 20% (169)        | 24% (57)         | 22% (168)            | 18% (788)            |         |
| House type: Multi-family house         | 4294 | 64% (1586)       | 65% (538)        | 76% (183)        | 67% (512)            | 66% (2819)           | 0.003   |
| Single room apartment                  |      | 2% (49)          | 2% (19)          | 1% (2)           | 3% (25)              | 2% (95)              |         |
| Single-family house                    |      | 34% (828)        | 33% (270)        | 24% (57)         | 30% (225)            | 32% (1380)           |         |
| Garden: No                             | 4294 | 38% (935)        | 43% (355)        | 52% (126)        | 49% (375)            | 42% (1791)           | <0.001  |
| Yes                                    |      | 62% (1528)       | 57% (472)        | 48% (116)        | 51% (387)            | 58% (2503)           |         |
| Nasopharyngeal swab: No                | 2774 | 93% (1482)       | 92% (454)        | 93% (151)        | 95% (491)            | 93% (2578)           | 0.418   |
| Yes                                    |      | 7% (120)         | 8% (37)          | 7% (11)          | 5% (28)              | 7% (196)             |         |
| Recent loss: No                        | 2759 | 91% (1458)       | 87% (423)        | 88% (139)        | 87% (452)            | 90% (2472)           | 0.004   |
| Yes                                    |      | 9% (137)         | 13% (64)         | 12% (19)         | 13% (67)             | 10% (287)            |         |
| Living alone: No                       | 4294 | 88% (2170)       | 89% (737)        | 88% (214)        | 87% (663)            | 88% (3784)           | 0.635   |
| Yes                                    |      | 12% (293)        | 11% (90)         | 12% (28)         | 13% (99)             | 12% (510)            |         |
| Pet: No                                | 4294 | 54% (1332)       | 52% (426)        | 63% (152)        | 52% (397)            | 54% (2307)           | 0.014   |

|    |                                              |      |            |           |           |           |            |        |
|----|----------------------------------------------|------|------------|-----------|-----------|-----------|------------|--------|
| 1  |                                              |      |            |           |           |           |            |        |
| 2  | Yes                                          |      | 46% (1131) | 48% (401) | 37% (90)  | 48% (365) | 46% (1987) |        |
| 3  | Physical activity: No                        | 3991 | 53% (1220) | 58% (443) | 59% (132) | 61% (432) | 56% (2227) | <0.001 |
| 4  | Yes                                          |      | 47% (1081) | 42% (317) | 41% (93)  | 39% (273) | 44% (1764) |        |
| 5  | <hr/>                                        |      |            |           |           |           |            |        |
| 6  | Dietary habits (weekly consumption)          |      |            |           |           |           |            |        |
| 7  | Pasta, Rice, Cereals                         | 3987 | 5/7/10     | 6/7/10    | 5/7/10    | 5/7/10    | 5/7/10     | 0.56   |
| 8  | Cereal-based products                        | 3984 | 3/7/7      | 4/7/7     | 4/7/7     | 4/7/7     | 3/7/7      | 0.018  |
| 9  | Raw meat                                     | 3985 | 2/3/4      | 2/3/4     | 2/3/4     | 2/3/4     | 2/3/4      | 0.15   |
| 10 | Cured meat                                   | 3981 | 1/2/3      | 1/2/3     | 1/2/3     | 1/2/3     | 1/2/3      | 0.404  |
| 11 | Fish                                         | 3985 | 1/2/2      | 1/2/2     | 1/1/2     | 1/2/2     | 1/2/2      | 0.443  |
| 12 | Milk and yogurt                              | 3982 | 2/7/7      | 2/6/7     | 2/7/7     | 2/6/7     | 2/7/7      | 0.398  |
| 13 | Milk-based products                          | 3984 | 2/3/5      | 2/3/5     | 1/3/5     | 2/3/5     | 2/3/5      | 0.002  |
| 14 | Fruit                                        | 3985 | 4/7/10     | 4/7/10    | 3/7/14    | 3/7/8.75  | 4/7/10     | 0.003  |
| 15 | Dried fruit                                  | 3981 | 0/2/5      | 0/2/5     | 0/1/5     | 0/2/4     | 0/2/5      | 0.061  |
| 16 | Vegetables                                   | 3984 | 6/7/14     | 6/7/14    | 6/7/14    | 5/7/14    | 6/7/14     | 0.043  |
| 17 | Legumes                                      | 3982 | 1/3/4      | 1/2/4     | 1/2/4     | 1/2/4     | 1/3/4      | 0.71   |
| 18 | Eggs                                         | 3984 | 1/2/2      | 1/2/2     | 1/2/2     | 1/2/3     | 1/2/2      | 0.836  |
| 19 | Food high in fat and sugar                   | 3980 | 1/3/6      | 2/3/6     | 2/4/7     | 2/4/7     | 2/3/7      | 0.012  |
| 20 | Soft drinks                                  | 3979 | 0/0/1      | 0/0/1     | 0/0/1     | 0/0/2     | 0/0/1      | <0.001 |
| 21 | Alcoholic drinks (e.g., wine, beer, spirits) | 3981 | 0/2/4      | 0/1/3     | 0/1/3     | 0/1/3     | 0/1/4      | <0.001 |
| 22 | <hr/>                                        |      |            |           |           |           |            |        |
| 23 |                                              |      |            |           |           |           |            |        |
| 24 |                                              |      |            |           |           |           |            |        |
| 25 |                                              |      |            |           |           |           |            |        |
| 26 |                                              |      |            |           |           |           |            |        |
| 27 |                                              |      |            |           |           |           |            |        |
| 28 |                                              |      |            |           |           |           |            |        |
| 29 |                                              |      |            |           |           |           |            |        |
| 30 |                                              |      |            |           |           |           |            |        |
| 31 |                                              |      |            |           |           |           |            |        |
| 32 |                                              |      |            |           |           |           |            |        |
| 33 |                                              |      |            |           |           |           |            |        |
| 34 |                                              |      |            |           |           |           |            |        |
| 35 |                                              |      |            |           |           |           |            |        |
| 36 |                                              |      |            |           |           |           |            |        |
| 37 |                                              |      |            |           |           |           |            |        |
| 38 |                                              |      |            |           |           |           |            |        |
| 39 |                                              |      |            |           |           |           |            |        |
| 40 |                                              |      |            |           |           |           |            |        |
| 41 |                                              |      |            |           |           |           |            |        |
| 42 |                                              |      |            |           |           |           |            |        |
| 43 |                                              |      |            |           |           |           |            |        |
| 44 |                                              |      |            |           |           |           |            |        |
| 45 |                                              |      |            |           |           |           |            |        |
| 46 |                                              |      |            |           |           |           |            |        |

Table 4. Results of the multivariable models (proportional odds model for the ordinal responses with more than two categories, i.e., CES-D and IES-R, logistic regression model the binary response variable, i.e., GHQ-12). For continuous variables, the effect is reported on the interquartile range (IQR); i.e., 26-54 for age, 3-20 for days from the starting of the survey). Results are reported as Odds Ratio (logistic regression) or Proportional OR (proportional odds models), 95% Confidence Interval (C.I.), P-value

Supplementary Material

|                                                                  | OR   | Lower 0.95 | Upper 0.95 |
|------------------------------------------------------------------|------|------------|------------|
| <i>GHQ</i>                                                       |      |            |            |
| Days from the starting of the survey                             | 1.19 | 0.95       | 1.49       |
| Gender: Male vs. Female                                          | 0.77 | 0.63       | 0.94       |
| Region: Low-incidence vs. High-incidence                         | 0.87 | 0.72       | 1.06       |
| Working status: Unemployed/Retired/Homemaker vs. Active employee | 1.99 | 1.4        | 2.85       |
| Working status: Student vs. Active employee                      | 1.10 | 0.85       | 1.43       |
| Physical activity: Yes vs. No                                    | 0.56 | 0.46       | 0.69       |
| <i>CES-D</i>                                                     |      |            |            |
| Days from the starting of the survey                             | 1.38 | 1.00       | 1.89       |
| Age                                                              | 0.39 | 0.32       | 0.48       |
| Gender: Male vs. Female                                          | 0.46 | 0.39       | 0.55       |
| Working status: Unemployed/Retired/Homemaker vs. Active employee | 1.57 | 1.22       | 2.02       |
| Working status: Student vs. Active employee                      | 1.73 | 1.31       | 2.28       |
| Garden: No vs. Yes                                               | 1.72 | 1.46       | 2.01       |
| Recent Loss: Yes vs. No                                          | 1.35 | 1.05       | 1.72       |
| Living alone: Yes vs. No                                         | 1.50 | 1.17       | 1.91       |
| Physical activity: Yes vs. No                                    | 0.64 | 0.55       | 0.75       |
| <i>IES-R</i>                                                     |      |            |            |
| Days from the starting of the survey                             | 1.03 | 0.75       | 1.42       |
| Age                                                              | 0.67 | 0.58       | 0.78       |
| Gender: Male vs. Female                                          | 0.30 | 0.25       | 0.37       |
| Educational level: Secondary vs. University                      | 1.29 | 1.10       | 1.52       |

|    |                                           |      |      |      |
|----|-------------------------------------------|------|------|------|
| 1  |                                           |      |      |      |
| 2  | Educational level: Primary vs. University | 0.48 | 0.05 | 4.55 |
| 3  | Garden: No vs. Yes                        | 1.55 | 1.33 | 1.82 |
| 4  | Recent Loss: Yes vs. No                   | 1.63 | 1.28 | 2.09 |
| 5  | Physical activity: Yes vs. No             | 0.72 | 0.61 | 0.84 |
| 6  |                                           |      |      |      |
| 7  |                                           |      |      |      |
| 8  |                                           |      |      |      |
| 9  |                                           |      |      |      |
| 10 |                                           |      |      |      |
| 11 |                                           |      |      |      |
| 12 |                                           |      |      |      |
| 13 |                                           |      |      |      |
| 14 |                                           |      |      |      |
| 15 |                                           |      |      |      |
| 16 |                                           |      |      |      |
| 17 |                                           |      |      |      |
| 18 |                                           |      |      |      |
| 19 |                                           |      |      |      |
| 20 |                                           |      |      |      |
| 21 |                                           |      |      |      |
| 22 |                                           |      |      |      |
| 23 |                                           |      |      |      |
| 24 |                                           |      |      |      |
| 25 |                                           |      |      |      |
| 26 |                                           |      |      |      |
| 27 |                                           |      |      |      |
| 28 |                                           |      |      |      |
| 29 |                                           |      |      |      |
| 30 |                                           |      |      |      |
| 31 |                                           |      |      |      |
| 32 |                                           |      |      |      |
| 33 |                                           |      |      |      |
| 34 |                                           |      |      |      |
| 35 |                                           |      |      |      |
| 36 |                                           |      |      |      |
| 37 |                                           |      |      |      |
| 38 |                                           |      |      |      |
| 39 |                                           |      |      |      |
| 40 |                                           |      |      |      |
| 41 |                                           |      |      |      |
| 42 |                                           |      |      |      |
| 43 |                                           |      |      |      |
| 44 |                                           |      |      |      |
| 45 |                                           |      |      |      |
| 46 |                                           |      |      |      |

For peer review only



Table S1. Respondents characteristics and habits according to residency; high incidence of COVID-19 regions (i.e., Piemonte, Veneto, Lombardia, Emilia-Romagna) and low incidence COVID-19 regions.

|                                            | N    | Low COVID-19 Incidence<br>(N=2301) | High COVID-19 Incidence<br>(N=2677) | Combined<br>(N=4978) | P-value |
|--------------------------------------------|------|------------------------------------|-------------------------------------|----------------------|---------|
| Age                                        | 4978 | 25/36/53                           | 27/39/55                            | 26/38/54             | <0.001  |
| Gender: Female                             | 4974 | 63% (1454)                         | 63% (1676)                          | 63% (3130)           | 0.614   |
| Male                                       |      | 37% (43)                           | 37% (1001)                          | 37% (1844)           |         |
| Nationality: Other                         | 4977 | 2% (42)                            | 1% (31)                             | 1% (73)              | 0.051   |
| Italian                                    |      | 98% (2259)                         | 99% (2645)                          | 99% (4904)           |         |
| Educational level: Secondary education     | 4973 | 51% (1175)                         | 45% (1193)                          | 48% (2368)           | <0.001  |
| University education                       |      | 48% (1113)                         | 55% (1475)                          | 52% (2588)           |         |
| Primary education                          |      | 0% (10)                            | 0% (7)                              | 0% (17)              |         |
| Working status: Active employee            | 4972 | 63% (1442)                         | 70% (1877)                          | 67% (3319)           | <0.001  |
| Unemployed/Retired/Homemaker               |      | 16% (376)                          | 13% (360)                           | 15% (736)            |         |
| Student                                    |      | 21% (481)                          | 16% (436)                           | 18% (917)            |         |
| House type: Multi-family house             | 4969 | 72% (1660)                         | 60% (1603)                          | 66% (3263)           | <0.001  |
| Single room apartment                      |      | 3% (60)                            | 2% (51)                             | 2% (111)             |         |
| Single-family house                        |      | 25% (579)                          | 38% (1016)                          | 32% (1595)           |         |
| Garden: No                                 | 4967 | 50% (1150)                         | 35% (932)                           | 42% (2082)           | <0.001  |
| Yes                                        |      | 50% (1147)                         | 65% (1738)                          | 58% (2885)           |         |
| Nasopharyngeal swab: No                    | 3221 | 97% (1371)                         | 90% (1623)                          | 93% (2994)           | <0.001  |
| Yes                                        |      | 3% (39)                            | 10% (188)                           | 7% (227)             |         |
| Recent loss: No                            | 3208 | 90% (1267)                         | 89% (1604)                          | 89% (2871)           | 0.186   |
| Yes                                        |      | 10% (136)                          | 11% (201)                           | 11% (337)            |         |
| Living alone: No                           | 4870 | 89% (1995)                         | 88% (2315)                          | 89% (4310)           | 0.196   |
| Yes                                        |      | 11% (243)                          | 12% (317)                           | 11% (560)            |         |
| Physical activity: No                      | 3981 | 55% (971)                          | 57% (1251)                          | 56% (2222)           | 0.159   |
| Yes                                        |      | 45% (808)                          | 43% (951)                           | 44% (1759)           |         |
| <i>Dietary habits (weekly consumption)</i> |      |                                    |                                     |                      |         |

|    |                                              |      |          |        |        |        |
|----|----------------------------------------------|------|----------|--------|--------|--------|
| 1  |                                              |      |          |        |        |        |
| 2  | Pasta, Rice, Cereals                         | 3977 | 5/7/10   | 5/7/10 | 5/7/10 | 0.215  |
| 3  | Cereal-based products                        | 3974 | 3/7/7    | 4/7/7  | 4/7/7  | <0.001 |
| 4  | Raw meat                                     | 3975 | 2/3/4.25 | 2/3/4  | 2/3/4  | 0.005  |
| 5  | Cured meat                                   | 3971 | 1/2/3    | 1/2/3  | 1/2/3  | <0.001 |
| 6  | Fish                                         | 3975 | 1/2/3    | 1/1/2  | 1/2/2  | <0.001 |
| 7  | Milk and yogurt                              | 3972 | 2/7/7    | 2/7/7  | 2/7/7  | 0.782  |
| 8  | Milk-based products                          | 3974 | 2/3/5    | 2/3/5  | 2/3/5  | 0.017  |
| 9  | Fruit                                        | 3975 | 4/7/10   | 4/7/12 | 4/7/10 | <0.001 |
| 10 | Dried fruit                                  | 3971 | 0/2/5    | 0/2/5  | 0/2/5  | 0.25   |
| 11 | Vegetables                                   | 3974 | 5/7/14   | 6/7/14 | 6/7/14 | <0.001 |
| 12 | Legumes                                      | 3972 | 2/3/4    | 1/2/4  | 1/3/4  | 0.005  |
| 13 | Eggs                                         | 3974 | 1/2/3    | 1/2/2  | 1/2/2  | 0.014  |
| 14 | Food high in fat and sugar                   | 3970 | 1/3/6    | 2/4/7  | 2/3/7  | 0.241  |
| 15 | Soft drinks                                  | 3969 | 0/0/1    | 0/0/1  | 0/0/1  | 0.969  |
| 16 | Alcoholic drinks (e.g., wine, beer, spirits) | 3971 | 0/1/4    | 0/1/4  | 0/1/4  | 0.001  |
| 17 |                                              |      |          |        |        |        |
| 18 |                                              |      |          |        |        |        |
| 19 |                                              |      |          |        |        |        |
| 20 |                                              |      |          |        |        |        |
| 21 |                                              |      |          |        |        |        |
| 22 |                                              |      |          |        |        |        |
| 23 |                                              |      |          |        |        |        |
| 24 |                                              |      |          |        |        |        |
| 25 |                                              |      |          |        |        |        |
| 26 |                                              |      |          |        |        |        |
| 27 |                                              |      |          |        |        |        |
| 28 |                                              |      |          |        |        |        |
| 29 |                                              |      |          |        |        |        |
| 30 |                                              |      |          |        |        |        |
| 31 |                                              |      |          |        |        |        |
| 32 |                                              |      |          |        |        |        |
| 33 |                                              |      |          |        |        |        |
| 34 |                                              |      |          |        |        |        |
| 35 |                                              |      |          |        |        |        |
| 36 |                                              |      |          |        |        |        |
| 37 |                                              |      |          |        |        |        |
| 38 |                                              |      |          |        |        |        |
| 39 |                                              |      |          |        |        |        |
| 40 |                                              |      |          |        |        |        |
| 41 |                                              |      |          |        |        |        |
| 42 |                                              |      |          |        |        |        |
| 43 |                                              |      |          |        |        |        |
| 44 |                                              |      |          |        |        |        |
| 45 |                                              |      |          |        |        |        |
| 46 |                                              |      |          |        |        |        |

Figure S1. Survey response report. The weekly response rate over the website accesses has been reported in Panel A where the dotted line represents the overall response rate (84.5%). Panel B represents the number of responses per day; Panel C reports the number of website accesses per day. The Number of responses per region is shown in panel C where the regions with a colour that comes close to blue are more represented in the survey.

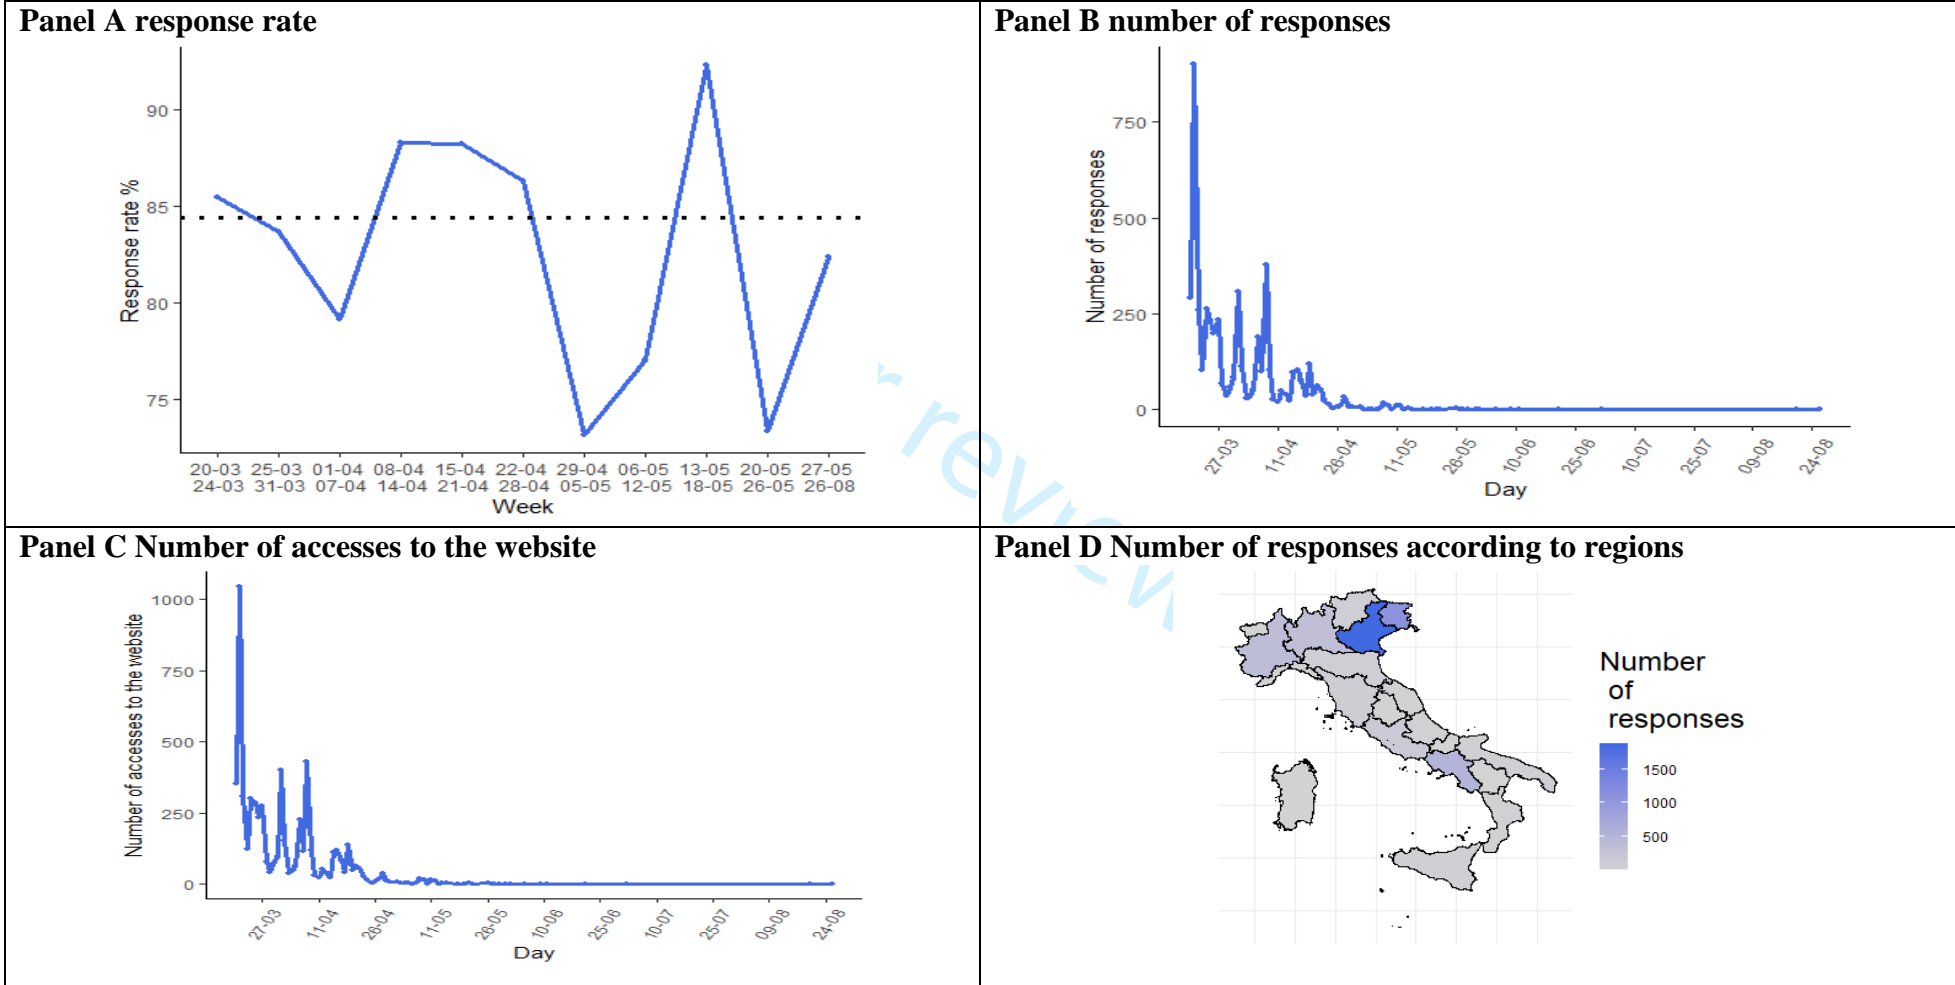

Figure S2. Missing Responses report. Percentage of missing responses per region. The dotted line represents the overall survey missing rate computed as a percentage (29.9%) of complete responses over the survey questionnaire

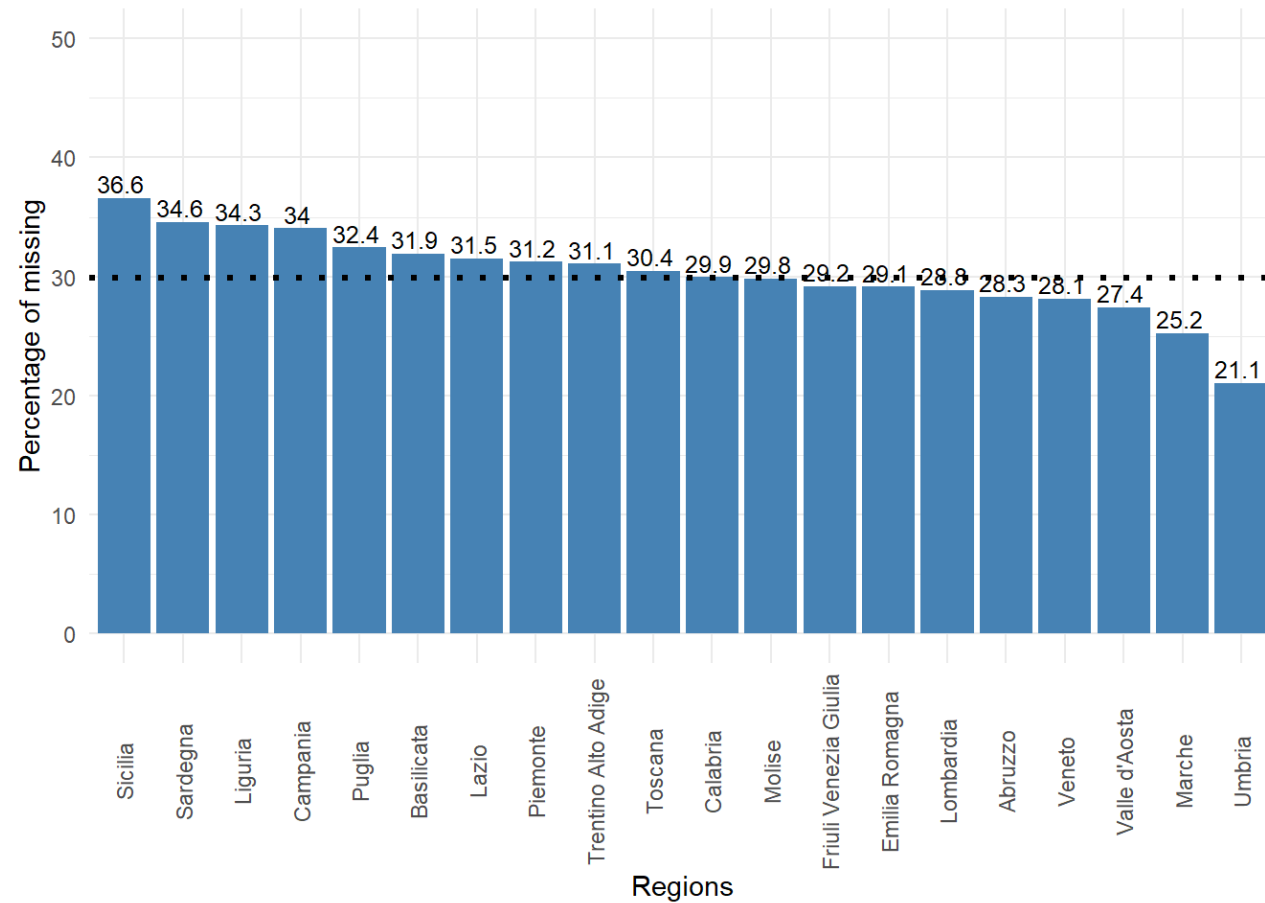

**STROBE 2007 (v4) Statement—Checklist of items that should be included in reports of *cross-sectional studies***

| Section/Topic                | Item # | Recommendation                                                                                                                                                                       | Reported on page # |
|------------------------------|--------|--------------------------------------------------------------------------------------------------------------------------------------------------------------------------------------|--------------------|
| <b>Title and abstract</b>    | 1      | (a) Indicate the study's design with a commonly used term in the title or the abstract                                                                                               | 1-3                |
|                              |        | (b) Provide in the abstract an informative and balanced summary of what was done and what was found                                                                                  | 3                  |
| <b>Introduction</b>          |        |                                                                                                                                                                                      |                    |
| Background/rationale         | 2      | Explain the scientific background and rationale for the investigation being reported                                                                                                 | 5                  |
| Objectives                   | 3      | State specific objectives, including any prespecified hypotheses                                                                                                                     | 5                  |
| <b>Methods</b>               |        |                                                                                                                                                                                      |                    |
| Study design                 | 4      | Present key elements of study design early in the paper                                                                                                                              | 5-6                |
| Setting                      | 5      | Describe the setting, locations, and relevant dates, including periods of recruitment, exposure, follow-up, and data collection                                                      | 6                  |
| Participants                 | 6      | (a) Give the eligibility criteria, and the sources and methods of selection of participants                                                                                          | 6                  |
| Variables                    | 7      | Clearly define all outcomes, exposures, predictors, potential confounders, and effect modifiers. Give diagnostic criteria, if applicable                                             | 6                  |
| Data sources/<br>measurement | 8*     | For each variable of interest, give sources of data and details of methods of assessment (measurement). Describe comparability of assessment methods if there is more than one group | 6                  |
| Bias                         | 9      | Describe any efforts to address potential sources of bias                                                                                                                            | 6                  |
| Study size                   | 10     | Explain how the study size was arrived at                                                                                                                                            | NA                 |
| Quantitative variables       | 11     | Explain how quantitative variables were handled in the analyses. If applicable, describe which groupings were chosen and why                                                         | 7                  |
| Statistical methods          | 12     | (a) Describe all statistical methods, including those used to control for confounding                                                                                                | 7                  |
|                              |        | (b) Describe any methods used to examine subgroups and interactions                                                                                                                  | NA                 |
|                              |        | (c) Explain how missing data were addressed                                                                                                                                          | 7                  |
|                              |        | (d) If applicable, describe analytical methods taking account of sampling strategy                                                                                                   | 7                  |
|                              |        | (e) Describe any sensitivity analyses                                                                                                                                                | NA                 |
| <b>Results</b>               |        |                                                                                                                                                                                      |                    |

|                          |     |                                                                                                                                                                                                              |         |
|--------------------------|-----|--------------------------------------------------------------------------------------------------------------------------------------------------------------------------------------------------------------|---------|
| Participants             | 13* | (a) Report numbers of individuals at each stage of study—eg numbers potentially eligible, examined for eligibility, confirmed eligible, included in the study, completing follow-up, and analysed            | 7       |
|                          |     | (b) Give reasons for non-participation at each stage                                                                                                                                                         | NA      |
|                          |     | (c) Consider use of a flow diagram                                                                                                                                                                           | NA      |
| Descriptive data         | 14* | (a) Give characteristics of study participants (eg demographic, clinical, social) and information on exposures and potential confounders                                                                     | 7       |
|                          |     | (b) Indicate number of participants with missing data for each variable of interest                                                                                                                          | Table 1 |
| Outcome data             | 15* | Report numbers of outcome events or summary measures                                                                                                                                                         | 7       |
| Main results             | 16  | (a) Give unadjusted estimates and, if applicable, confounder-adjusted estimates and their precision (eg, 95% confidence interval). Make clear which confounders were adjusted for and why they were included | 7-8     |
|                          |     | (b) Report category boundaries when continuous variables were categorized                                                                                                                                    | 7-8     |
|                          |     | (c) If relevant, consider translating estimates of relative risk into absolute risk for a meaningful time period                                                                                             | NA      |
| Other analyses           | 17  | Report other analyses done—eg analyses of subgroups and interactions, and sensitivity analyses                                                                                                               | NA      |
| <b>Discussion</b>        |     |                                                                                                                                                                                                              |         |
| Key results              | 18  | Summarise key results with reference to study objectives                                                                                                                                                     | 9       |
| Limitations              | 19  | Discuss limitations of the study, taking into account sources of potential bias or imprecision. Discuss both direction and magnitude of any potential bias                                                   | 10      |
| Interpretation           | 20  | Give a cautious overall interpretation of results considering objectives, limitations, multiplicity of analyses, results from similar studies, and other relevant evidence                                   | 10      |
| Generalisability         | 21  | Discuss the generalisability (external validity) of the study results                                                                                                                                        | 10      |
| <b>Other information</b> |     |                                                                                                                                                                                                              |         |
| Funding                  | 22  | Give the source of funding and the role of the funders for the present study and, if applicable, for the original study on which the present article is based                                                | 11      |

\*Give information separately for cases and controls in case-control studies and, if applicable, for exposed and unexposed groups in cohort and cross-sectional studies.

**Note:** An Explanation and Elaboration article discusses each checklist item and gives methodological background and published examples of transparent reporting. The STROBE checklist is best used in conjunction with this article (freely available on the Web sites of PLoS Medicine at <http://www.plosmedicine.org/>, Annals of Internal Medicine at <http://www.annals.org/>, and Epidemiology at <http://www.epidem.com/>). Information on the STROBE Initiative is available at [www.strobe-statement.org](http://www.strobe-statement.org).

# BMJ Open

## Impact of the COVID-19 lockdown on psychological health and nutritional habits in Italy: results from the #PRESTOinsieme study

|                                 |                                                                                                                                                                                                                                                                                                                                                                                                                                                                                                                                                   |
|---------------------------------|---------------------------------------------------------------------------------------------------------------------------------------------------------------------------------------------------------------------------------------------------------------------------------------------------------------------------------------------------------------------------------------------------------------------------------------------------------------------------------------------------------------------------------------------------|
| Journal:                        | <i>BMJ Open</i>                                                                                                                                                                                                                                                                                                                                                                                                                                                                                                                                   |
| Manuscript ID                   | bmjopen-2021-048916.R1                                                                                                                                                                                                                                                                                                                                                                                                                                                                                                                            |
| Article Type:                   | Original research                                                                                                                                                                                                                                                                                                                                                                                                                                                                                                                                 |
| Date Submitted by the Author:   | 03-Aug-2021                                                                                                                                                                                                                                                                                                                                                                                                                                                                                                                                       |
| Complete List of Authors:       | Lorenzoni, Giulia; University of Padova<br>Azzolina, Danila; University of Padova; University of Ferrara<br>Maresio, Elisabetta; Psychotherapy Unit Prochild Onlus<br>Gallipoli, Silvia; Zeta Research Ltd<br>Ghidina, Marco; Zeta Research Ltd<br>Baldas, Solidea; Prochild Onlus<br>Berchiolla, Paola; Università degli Studi di Torino<br>Giron, Maria Cecilia; University of Padova<br>Silano, Marco; Istituto Superiore di Sanità, Unit of Human Nutrition and Health<br>Gregori, Dario; University of Padova School of Medicine and Surgery |
| <b>Primary Subject Heading</b>: | Public health                                                                                                                                                                                                                                                                                                                                                                                                                                                                                                                                     |
| Secondary Subject Heading:      | Epidemiology                                                                                                                                                                                                                                                                                                                                                                                                                                                                                                                                      |
| Keywords:                       | COVID-19, NUTRITION & DIETETICS, Anxiety disorders < PSYCHIATRY, Public health < INFECTIOUS DISEASES                                                                                                                                                                                                                                                                                                                                                                                                                                              |
|                                 |                                                                                                                                                                                                                                                                                                                                                                                                                                                                                                                                                   |

SCHOLARONE™  
Manuscripts

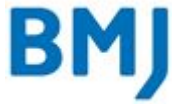

I, the Submitting Author has the right to grant and does grant on behalf of all authors of the Work (as defined in the below author licence), an exclusive licence and/or a non-exclusive licence for contributions from authors who are: i) UK Crown employees; ii) where BMJ has agreed a CC-BY licence shall apply, and/or iii) in accordance with the terms applicable for US Federal Government officers or employees acting as part of their official duties; on a worldwide, perpetual, irrevocable, royalty-free basis to BMJ Publishing Group Ltd ("BMJ") its licensees and where the relevant Journal is co-owned by BMJ to the co-owners of the Journal, to publish the Work in this journal and any other BMJ products and to exploit all rights, as set out in our [licence](#).

The Submitting Author accepts and understands that any supply made under these terms is made by BMJ to the Submitting Author unless you are acting as an employee on behalf of your employer or a postgraduate student of an affiliated institution which is paying any applicable article publishing charge ("APC") for Open Access articles. Where the Submitting Author wishes to make the Work available on an Open Access basis (and intends to pay the relevant APC), the terms of reuse of such Open Access shall be governed by a Creative Commons licence – details of these licences and which [Creative Commons](#) licence will apply to this Work are set out in our licence referred to above.

Other than as permitted in any relevant BMJ Author's Self Archiving Policies, I confirm this Work has not been accepted for publication elsewhere, is not being considered for publication elsewhere and does not duplicate material already published. I confirm all authors consent to publication of this Work and authorise the granting of this licence.



1  
2  
3 **Impact of the COVID-19 lockdown on psychological health and nutritional habits in Italy:**  
4 **results from the #PRESTOinsieme study**  
5  
6

7 Giulia Lorenzoni <sup>1\*</sup>, Danila Azzolina <sup>1,2\*</sup>, Elisabetta Maresio<sup>3\*</sup>, Silvia Gallipoli <sup>4</sup>, Marco Ghidina <sup>4</sup>,  
8 Solidea Baldas <sup>8</sup>, Paola Berchiolla <sup>5</sup>, Maria Cecilia Giron <sup>6</sup>, Marco Silano <sup>7</sup>, Dario Gregori <sup>\*1</sup>, and the  
9  
10 #PRESTOinsieme Study Group<sup>1</sup>  
11  
12

13  
14 <sup>1</sup> Unit of Biostatistics, Epidemiology and Public Health, Department of Cardiac, Thoracic, Vascular  
15 Sciences, and Public Health, University of Padova, Padova, Italy  
16

17  
18  
19 <sup>2</sup> Department of Medical Sciences, University of Ferrara, Ferrara, Italy  
20

21  
22 <sup>3</sup> Psychotherapy Unit, Prochild Onlus, Trieste, Italy  
23

24  
25 <sup>4</sup> Zeta Research Ltd., Trieste, Italy  
26

27  
28 <sup>5</sup> Department of Clinical and Biological Sciences, University of Turin, Turin, Italy  
29

30  
31 <sup>6</sup> Department of Pharmaceutical and Pharmacological Sciences, University of Padova, Padova, Italy  
32

33  
34 <sup>7</sup> Unit of Human Nutrition and Health, Department of Food Safety, Nutrition and Veterinary Public  
35 Health, Italian National Institute of Health, Rome, Italy  
36

37  
38 <sup>8</sup> Prochild Onlus, Trieste, Italy  
39

40  
41  
42 **Corresponding author:**  
43

44  
45 Prof. Dario Gregori, MA, Ph.D., FACN, FTOS  
46

47  
48 Unit of Biostatistics, Epidemiology and Public Health,  
49  
50

51  
52  
53  
54 

---

  
55 \*These authors should be considered equally first-authors

56 <sup>1</sup> #PRESTOinsieme Study Group: Elisabetta Maresio (Prochild Onlus), Marco Silano (Italian National Institute of Health), Dario Gregori (University  
57 of Padova), Giulia Lorenzoni (University of Padova), Nicolas Destro (University of Padova), Danila Azzolina (University of Piemonte Orientale),  
58 Corrado Lanera (University of Padova), Paola Berchiolla (University of Turin), Silvia Gallipoli (Zeta Research), Solidea Baldas (Prochild Onlus),  
59 Federica Zobec (Zeta Research), Marco Ghidina (Zeta Research)  
60

1  
2  
3  
4  
5  
6  
7  
8  
9  
10  
11  
12  
13  
14  
15  
16  
17  
18  
19  
20  
21  
22  
23  
24  
25  
26  
27  
28  
29  
30  
31  
32  
33  
34  
35  
36  
37  
38  
39  
40  
41  
42  
43  
44  
45  
46  
47  
48  
49  
50  
51  
52  
53  
54  
55  
56  
57  
58  
59  
60

Department of Cardiac, Thoracic, Vascular Sciences and Public Health,

University of Padova,

Via Loredan, 18

35131 Padova, Italy

Phone: +393473518231

Email: [dario.gregori@unipd.it](mailto:dario.gregori@unipd.it)

**Word count:** 2641

For peer review only

## Abstract

**Objectives.** The present work aims to present the results of the "*PRESTOinsieme*" (which is "*we'll be together soon*" in English). The web-based survey ([www.prestoinsieme.com](http://www.prestoinsieme.com)) describes changes in lifestyle habits and symptoms of psychological discomfort in the Italian population during the COVID-19 lockdown and characterizes participants presenting with impaired psychological statuses.

**Design:** Online survey disseminated by messaging apps (i.e., WhatsApp and Telegram) and social networks (i.e., Instagram, Facebook, and LinkedIn).

**Setting:** Italy

**Participants:** Italian population older than 16 years of age

**Exposure:** COVID-19 lockdown

**Main Outcomes and Measures:** Survey respondents filled out a set of validated questionnaires aimed at assessing lifestyle habits and psychological health, i.e., the General Health Questionnaire (GHQ-12) to screen for psychological distress, the Impact of Event Scale-Revised (IES-R) to screen for posttraumatic stress, and the Center for Epidemiologic Studies Depression Scale (CES-D).

**Results:** Survey respondents totaled 5008. Moderate or severe psychological distress was reported in 25.5% and 22% of survey respondents, respectively. Lower age, female gender, being unemployed (OR 1.57, 95% C.I. 1.217-2.024) or being a student (OR 1.726, 95% C.I. 1.306-2.28) were predictors of more severe depressive symptoms.

**Conclusions.** The present study is one of the largest population-based surveys conducted in Italy during the first COVID-19 lockdown, providing valuable data about the Italian population's psychological health. Further studies should be conducted to understand whether psychological distress persists after the end of the lockdown.

**Keywords.** Italy; COVID-19; Lockdown; Dietary habits; Psychological distress

1  
2  
3  
4  
5  
6  
7  
8  
9  
10  
11  
12  
13  
14  
15  
16  
17  
18  
19  
20  
21  
22  
23  
24  
25  
26  
27  
28  
29  
30  
31  
32  
33  
34  
35  
36  
37  
38  
39  
40  
41  
42  
43  
44  
45  
46  
47  
48  
49  
50  
51  
52  
53  
54  
55  
56  
57  
58  
59  
60

### **Strengths and limitations of this study**

- The study is a web-based survey consisting of a set of validated questionnaires to assess the Italian population's psychological wellbeing and lifestyle habits during the COVID-19 lockdown.
- The survey involved 5008 participants over age 16, and it represents one of the largest surveys conducted during the first COVID-19 lockdown in Italy, the European country most severely affected by the first wave of the COVID-19 outbreak.
- The survey provides a characterization of those individuals most vulnerable to the side effects of the lockdown, who might require public health support programs.
- Further studies should be conducted to understand the long-term consequences of the COVID-19 lockdown affecting psychological health and lifestyle habits.

peer review only

## Introduction

Containment measures (e.g., social distancing and a national lockdown) are crucial public health strategies in the fight against COVID-19 [1]. Even though such actions are essential to contain the COVID-19 pandemic, it is worth noting that they might adversely affect physical [2] and psychological [3] health and seem to be associated with an increased risk of domestic accidents [4]. Mental health changes during the lockdown have been detected, showing an increased prevalence/severity of anxiety and depressive symptoms together with an impairment of psychological functions involving memory and attention [5–7]. Furthermore, changes in lifestyle habits in response to COVID-19 and the lockdown have been reported. Studies have found a decrease in physical activity frequency, an impairment of sleep habits, and unhealthy eating habits [8,9]. It appears to be of extreme importance to take appropriate public health actions to mitigate the adverse effects of lockdowns [10] and to identify groups more vulnerable to the potential side effects of lockdowns to develop public health actions explicitly meant for these vulnerable populations [10]. Italy is the first European country where the COVID-19 outbreak occurred [11], causing an excess of mortality with severe overloads for the healthcare system [12]. The first containment measures were introduced on the 23<sup>rd</sup> of February 2020 in the two Italian regions where the coronavirus first spread (Veneto and Lombardia) [13]. However, over a short time, the disease also spread to other Italian regions, so the Italian government introduced new containment measures at the national level on the 11<sup>th</sup> of March 2020. Finally, on the 22<sup>nd</sup> of March 2020, a nationwide lockdown was implemented. Data on the Italian population during the lockdown show impaired emotional wellbeing and unhealthy lifestyle changes [14].

The present work aims to present the results of the "*PRESTOinsieme*" (imPact of quaRantine mEasures againST cOvid19, which is known as "we will be together soon" in English) project, a web-based survey conducted in Italy. The study aims to describe changes in lifestyle habits and the prevalence of psychological discomfort symptoms in the Italian population during the COVID-19 lockdown and characterize participants presenting with impaired psychological statuses. The reason for analyzing and presenting data on both psychological wellbeing and lifestyle habits is the strict relationship documented between these two dimensions. An example of such a relationship is represented by emotional eating. Individuals experiencing anxiety and depressive symptoms are prone to emotional eating habits, i.e., eating to relieve stress instead of physical hunger, and this phenomenon was reported during the lockdown [15,16].

## Methods

1  
2  
3 The *PRESTOinsieme* project is a web-based survey open to volunteers older than 16 years of age  
4 ([www.prestoinsieme.com](http://www.prestoinsieme.com)). The project began in Italy on the 20<sup>th</sup> of March 2020 to assess the effects  
5 of the national lockdown on the population's psychological health and lifestyle habits.  
6  
7

### 8 9 *Sampling strategy*

10  
11 The survey was web-based via Lime Survey [17] and disseminated by messaging apps (i.e.,  
12 WhatsApp and Telegram) and social networks (i.e., Instagram, Facebook, and LinkedIn). Survey  
13 respondents were encouraged to spread the survey to their contacts, i.e., virtual snowball sampling.  
14  
15 Five-thousand nine hundred-thirty survey accesses were registered during the study period; 5008  
16 responded, i.e., 84.5%. The response rate, calculated as the proportion of survey responses over the  
17 number of accesses to the survey website, ranged between 70% and 95% during the study period  
18 (Figure S1, Panel A). The analysis included all survey responses collected until the 24<sup>th</sup> of August  
19 2020; however, 73% of survey responses were recorded until the end of the lockdown, i.e., the 3<sup>rd</sup> of  
20 May 2020 (Figure S1, Panel B, and C). The regions most affected by the outbreak (i.e., Lombardia,  
21 Veneto, Piemonte, and Emilia-Romagna) provided the highest number of responses, except for  
22 Campania and Friuli Venezia Giulia (Figure S1, Panel D). Figure S2 reports the proportion of  
23 responses with missing data for each region, ranging from 36.6% to 21.1%, with an average of 29.9%.  
24  
25  
26  
27  
28  
29  
30  
31

### 32 33 *Questionnaires*

34  
35 The survey consisted of validated questionnaires examining participants' personal and household  
36 characteristics, psychological health, and lifestyle habits. Regarding psychological health, three  
37 screening instruments for psychological distress, depression, and posttraumatic stress were  
38 administered. The General Health Questionnaire (GHQ-12) was used to screen for psychological  
39 distress. The GHQ-12 was scored using the 4-point Likert method (0-1-2-3), with a threshold of 14  
40 points to indicate psychological distress [18]. The Center for Epidemiologic Studies Depression Scale  
41 (CES-D) was used to screen for depression, considering three classes of symptom severity: 0-15  
42 (no/mild depressive symptoms), 16-23 (moderate depressive symptoms), and 24-60 (severe  
43 depressive symptoms). Finally, the Impact of Event Scale-Revised (IES-R) was used to screen for  
44 posttraumatic stress. According to a recent publication in the field [19], the total score of the IES-R  
45 was classified as follows: 0–23 (normal), 24–32 (mild psychological impact), 33–36 (moderate  
46 psychological impact), and  $\geq 37$  (severe psychological impact). Finally, lifestyle habits were  
47 assessed using a routine, validated questionnaire that is used in the Italian Food Consumption Survey  
48 (INRAN) [20], which inquires about weekly food intake and physical activity frequency.  
49  
50  
51  
52  
53  
54  
55  
56  
57  
58  
59

### 60 *Patient and Public Involvement*

1  
2  
3 Not applicable  
4

5 *Statistical analysis*  
6

7  
8 Continuous data are reported as medians (quartiles I and III); categorical data are summarized as  
9 percentages and absolute frequencies. Wilcoxon-type tests were performed for continuous variables,  
10 and the Pearson chi-squared test or Fisher exact test was performed for categorical variables. The  
11 Pearson chi-squared test was performed when the number of observations per cell was above five;  
12 otherwise, Fisher's exact test was performed.  
13

14  
15 Multivariable regression models were estimated to identify predictors of psychological distress,  
16 depression, and posttraumatic stress. The categorized version of the three instruments' scores was  
17 used in the analyses. A proportional odds model was estimated for ordinal responses with more than  
18 two categories (CES-D and IES-R). A logistic regression model was estimated for the binary response  
19 variable (GHQ-12). The variables included in the model were selected via the backward elimination  
20 method and Akaike information criterion (AIC). All the models were adjusted by time from the start  
21 of the survey, which was computed as the difference between the start date of the survey and each  
22 participant response date. The time was entered in the models to account for potential confounding  
23 since the COVID-19 restrictions changed over the survey timespan. The nonlinear effects on the study  
24 outcome (i.e., respondents' age and time effect) were included in the model using restricted cubic  
25 splines (RCS). The model estimated odds ratios (ORs) together with the 95% confidence interval  
26 (CI), and p-values were reported.  
27

28  
29 The computations were performed using the software R 4.0.2 [21] with the rms [22] package.  
30

31  
32 **Results**  
33

34  
35 There were 5008 survey respondents. The median age was 38 years, and the female gender was the  
36 most prevalent (63%). Concerning socioeconomic status, approximately half of the sample has  
37 attained a secondary education (48%), and two-thirds were actively employed (67%).  
38

39  
40 Table S1 (Supplementary Material) reports the analysis of respondents' sociodemographic  
41 characteristics according to the place where they lived. Participants living in areas with high numbers  
42 of COVID-19 infections were significantly older and had a higher socioeconomic status than residents  
43 of regions with low rates of COVID-19. Furthermore, most participants from high COVID-19  
44 incidence areas were found to have university educations, and they were more likely to have a job  
45 and to live in a single-family house with a garden.  
46

47  
48 Tables 1-2-3 present respondents' characteristics according to the scores obtained at the screening  
49 tools for psychological distress, depression, and posttraumatic stress.  
50  
51  
52  
53  
54  
55  
56  
57  
58  
59  
60

### *Psychological distress*

Most of the survey respondents (88.6%) suffered from psychological distress (GHQ score  $\geq 14$ ). The prevalence of psychological distress was significantly higher in females ( $p = 0.049$ ), unemployed individuals ( $p = 0.001$ ), and those who did not engage in physical activity ( $p < 0.001$ ) (Table 1). The results were confirmed by multivariable analysis (Table 4). Unemployed/retired/homemakers were found to be at significantly higher risk for psychological distress than active employees (OR 1.99, 95% CI 1.4-2.85), together with females (OR 0.77 95% CI 0.63-0.94, male vs. female).

### *Depression*

Half of the sample suffered from moderate (25.5%, 1057 participants) or severe (22%, 909 participants) depressive symptoms. In the univariable analysis (Table 2), young women (median age of 29 years) were significantly more likely to report severe depressive symptoms, while participants with no or moderate depressive symptoms had median ages of 43 and 34, respectively ( $p < 0.001$ ). In addition, participants living in multifamily houses/single-room apartments without a garden were significantly more likely to exhibit frequent moderate to severe symptoms of depression. In line with univariable analysis, lower age (OR 0.39 for interquartile range (IQR) 26-54, 95% CI 0.32-0.48), female gender, being unemployed/retired/homemaker (OR 1.57, 95% CI 1.22-2.02) or being students (OR 1.73, 95% CI 1.31-2.28) were found to be significant predictors of more severe depressive symptoms (Table 4). Additionally, participants who lived alone (OR 1.50 95% CI 1.17-1.91) and experienced a loss (OR 1.35, 95% CI 1.05-1.72) were found to be significantly more likely to suffer from depressive symptoms. Conversely, engaging in physical activity was found to be protective against the worst depressive symptoms (OR 0.64, 95% CI 0.55-0.75).

### *Posttraumatic stress*

The prevalence of moderate and severe psychological effects was 5.6% and 17.7%, respectively. For moderate/severe depressive symptoms, the impact was significantly higher in females, young respondents, and participants living in multifamily houses (Table 3). The multivariable analysis confirmed these results (Table 4).

### *Dietary habits*

Overall, participants reported eating pasta/rice/cereals and cereal-based products a median of 7 times per week. Meat was reported more frequently than fish (median of 3 times per week vs. median of 2 times per week), while the consumption of legumes was reported to be a median of 3 times per week. The consumption of fruits and vegetables was a median of 7 times per week each.



1  
2  
3 The analysis of the distribution of weekly food frequency according to the categorized scores of the  
4 psychological health screening tools (Tables 1-2-3) shows no statistically significant differences for  
5 GHQ scores, except for consumption of vegetables and legumes (significantly lower for participants  
6 with psychological distress,  $p = 0.003$  and  $p = 0.002$ ). Participants with moderate/severe depressive  
7 symptoms were found to consume milk-based products less frequently ( $p < 0.001$ ), fruit ( $p < 0.001$ ),  
8 dried fruit ( $p < 0.001$ ), and vegetables ( $p = 0.013$ ). Conversely, they were significantly more likely to  
9 eat foods high in fat and sugar more frequently ( $p = 0.008$ ). Similarly, participants with  
10 moderate/severe psychological impact showed a lower consumption of fruit ( $p = 0.003$ ). At the same  
11 time, they were more likely to frequently eat foods high in fat and sugar ( $p = 0.012$ ).  
12  
13  
14  
15  
16  
17  
18  
19

## 20 Discussion

21  
22 The present findings show a high prevalence of moderate to severe depressive symptoms during the  
23 lockdown. The characterization of survey respondents showed that female students and  
24 unemployed/retired/homemaker individuals living in a multifamily house without a garden were at  
25 higher risk. Conversely, only a small proportion of participants reported moderate to severe  
26 psychological impact, and, again, young females and unemployed/retired/homemaker individuals  
27 were the most affected.  
28  
29

30  
31 A recent review in the field has shown that over a short-term period, quarantine is associated with an  
32 increased prevalence of anxiety, depression, and posttraumatic stress symptoms [23]. Such findings  
33 are confirmed by surveys conducted in the most affected countries during the COVID-19 lockdown,  
34 showing that the population presented with increased feelings of anxiety and depression [14,19].  
35 Furthermore, emotional eating has been frequently reported [15], highlighting the strong and direct  
36 association between psychological wellbeing and lifestyle habits, which have been recently  
37 documented in college students during lockdown [24]. Surveyed individuals have reported doing less  
38 physical activity and snacking more frequently during the lockdown, with consequent weight gain  
39 [25,26]. Disturbingly, such changes have also been shown to affect children [27] with potentially  
40 detrimental long-term consequences for their health since such lifestyle changes could result in an  
41 increased risk for noncommunicable diseases over the life course.  
42  
43  
44  
45  
46  
47  
48  
49  
50

51  
52 A recent meta-analysis showed a 33.7% prevalence of depression [3], while in the present study, the  
53 proportion of subjects reporting moderate to severe depressive symptoms was 47.5%. However, when  
54 only severe depressive symptoms are considered, the prevalence is consistent with previous studies  
55 in the field [3]. Conversely, the prevalence of moderate to severe symptoms of posttraumatic stress  
56 was not consistent with reports in the literature [19,28], especially when only severe psychological  
57 impact was considered. In discussing such data, it is worth noting that studies in the field have  
58  
59  
60

1  
2  
3 employed different tools to ascertain the prevalence of depression, anxiety, and posttraumatic stress,  
4 making it difficult to compare results across studies.

5  
6 Regarding the characterization of depressed participants, in line with the literature, female gender,  
7 low socioeconomic status [5], younger age, and being a student [29] were found to be significant  
8 predictors of depression.  
9  
10

### 11 12 *Dietary habits*

13  
14  
15 The study of dietary habits during the lockdown showed that participants were not compliant with  
16 the Mediterranean pyramid targets [30]. Half of the sample reported eating fruits and vegetables only  
17 twice a day, even though their recommended consumption is five times a day. In addition, participants  
18 reported eating foods high in fat and sugars (e.g., cakes) a median of 3 times a week (interquartile  
19 range 2-7), meaning that 25% of the sample ate such foods once a day, even though their consumption  
20 is recommended to be occasional. Such findings are in line with the literature, demonstrating that  
21 participants tended to snack more frequently during lockdown [25]. Fish consumption is  
22 recommended three times per week, but participants report eating fish a median of 2 times per week.  
23  
24 We cannot rule out that lockdown might pose difficulties in the purchase of fish.  
25

26  
27 Interestingly, dietary patterns were found to be even worse among participants with symptoms of  
28 depression and psychological impact. They reported frequently eating foods high in fat and sugar  
29 and fruits and vegetables less frequently than participants without symptoms of depression and  
30 psychological impact. Such a finding could be interpreted as emotional eating, which has been  
31 reported during lockdown [15]. However, we can also hypothesize that participants with  
32 psychological discomfort had worse eating habits because of a worse socioeconomic status since they  
33 were more likely not to have a job and to live in a smaller house without a garden. However, we  
34 cannot clarify the issue because we did not investigate eating habits before lockdown.  
35  
36

37  
38 The fact that no data about participants' habits before lockdown were available represents a study  
39 limitation. Another limitation is the nonnegligible proportion of survey responses presenting with  
40 missing data and the higher proportion of responses from high-incidence COVID-19 regions  
41 compared with those from regions with a low incidence of COVID-19. Furthermore, the analysis of  
42 missing data showed that the proportion varied across regions, with the lowest proportion in regions  
43 with a high COVID-19 incidence. We cannot rule out that such limits might lead to an overestimation  
44 of psychological distress prevalence; however, when only the proportion of severe depressive  
45 symptoms was considered, it was in line with the literature. More responses came from high-  
46 incidence COVID-19 regions because residents of those regions were more prone to respond to the  
47 survey. Further, that fact is related to the sampling technique employed, i.e., snowball sampling. The  
48  
49  
50  
51  
52  
53  
54  
55  
56  
57  
58  
59  
60

1  
2  
3 technique may result in a selection bias by including individuals who belong to a specific social  
4 network and excluding individuals not in that social network. However, snowball sampling is a well-  
5 known and widely used sampling technique in the social sciences.  
6  
7

8 The present work presents several strengths. First, it is one of the largest population-based surveys  
9 conducted in Italy during the first COVID-19 lockdown, providing valuable data about the Italian  
10 population's psychological health. Furthermore, the results provide a characterization of individuals  
11 who are most vulnerable to the side effects of lockdown.  
12  
13  
14

15 These results have relevant implications for future research and public health. First, they provide  
16 insight into the need to understand the long-term consequences of lockdowns on psychological health  
17 and lifestyle habits, which need to be investigated further since data in the field are lacking. Further,  
18 if the long-term effects of lockdowns are confirmed, the present results help identify vulnerable  
19 populations that potentially benefit from follow-up programs of psychological support in the case of  
20 persistent psychological distress.  
21  
22  
23  
24  
25  
26  
27  
28  
29  
30  
31  
32  
33  
34  
35  
36  
37  
38  
39  
40  
41  
42  
43  
44  
45  
46  
47  
48  
49  
50  
51  
52  
53  
54  
55  
56  
57  
58  
59  
60

1  
2  
3  
4  
5  
6  
7  
8  
9  
10  
11  
12  
13  
14  
15  
16  
17  
18  
19  
20  
21  
22  
23  
24  
25  
26  
27  
28  
29  
30  
31  
32  
33  
34  
35  
36  
37  
38  
39  
40  
41  
42  
43  
44  
45  
46  
47  
48  
49  
50  
51  
52  
53  
54  
55  
56  
57  
58  
59  
60

**Author contributions.** DG conception of the work; DG, EM, MS design of the work; SG, SB, and MG data acquisition; DA data analysis; GL interpretation of results and draft of the work; PB and MCG substantial revision of the work.

**Funding.** This research received no specific grant from any funding agency in the public, commercial or not-for-profit sectors.

**Competing interests.** None declared

**Data sharing.** The datasets used and/or analyzed during the current study are available from the corresponding author on reasonable request.

**Patient consent.** Not applicable

**Ethical approval.** Not applicable

## References

- 1 Anderson RM, Heesterbeek H, Klinkenberg D, *et al*. How will country-based mitigation measures influence the course of the COVID-19 epidemic? *The Lancet* 2020.
- 2 Tona F, Plebani M, Gregori D, *et al*. "Stay home stay safe?" Systemic inflammation in subjects undergoing routine hematology tests during the lockdown period of COVID-19. *Clin Chem Lab Med CCLM* 2020;1.
- 3 Salari N, Hosseini-Far A, Jalali R, *et al*. Prevalence of stress, anxiety, depression among the general population during the COVID-19 pandemic: a systematic review and meta-analysis. *Glob Health* 2020;16:1–11.
- 4 Bressan S, Gallo E, Tirelli F, *et al*. Lockdown: more domestic accidents than COVID-19 in children. *Arch Dis Child* 2020.
- 5 Ettman CK, Abdalla SM, Cohen GH, *et al*. Prevalence of Depression Symptoms in US Adults Before and During the COVID-19 Pandemic. *JAMA Netw Open* 2020;3:e2019686–e2019686.
- 6 Fiorenzato E, Zabberoni S, Costa A, *et al*. Cognitive and mental health changes and their vulnerability factors related to COVID-19 lockdown in Italy. *PLoS One* 2021;16:e0246204.
- 7 Fiorillo A, Sampogna G, Giallonardo V, *et al*. Effects of the lockdown on the mental health of the general population during the COVID-19 pandemic in Italy: Results from the COMET collaborative network. *Eur Psychiatry* 2020;63.
- 8 Cellini N, Canale N, Mioni G, *et al*. Changes in sleep pattern, sense of time and digital media use during COVID-19 lockdown in Italy. *J Sleep Res* 2020;:e13074.
- 9 Canello R, Soranna D, Zambra G, *et al*. Determinants of the lifestyle changes during COVID-19 pandemic in the residents of Northern Italy. *Int J Environ Res Public Health* 2020;17:6287.
- 10 Bavli I, Sutton B, Galea S. Harms of public health interventions against covid-19 must not be ignored. *bmj* 2020;371.
- 11 Gregori D, Azzolina D, Lanera C, *et al*. A first estimation of the impact of public health actions against COVID-19 in Veneto (Italy). *J Epidemiol Community Health* Published Online First: 2020. doi:10.1136/jech-2020-214209
- 12 Magnani C, Azzolina D, Gallo E, *et al*. How Large Was the Mortality Increase Directly and Indirectly Caused by the COVID-19 Epidemic? An Analysis on All-Causes Mortality Data in Italy. *Int J Environ Res Public Health* 2020;17:3452. doi:10.3390/ijerph17103452
- 13 Lorenzoni G, Lanera C, Azzolina D, *et al*. Is a more aggressive COVID-19 case detection approach mitigating the burden on ICUs? Some reflections from Italy. *Crit Care* 2020;24:1–2.
- 14 Di Renzo L, Gualtieri P, Cinelli G, *et al*. Psychological Aspects and Eating Habits during COVID-19 Home Confinement: Results of EHLC-COVID-19 Italian Online Survey. *Nutrients* 2020;12:2152.
- 15 Cherikh F, Frey S, Bel C, *et al*. Behavioral food addiction during lockdown: time for awareness, time to prepare the aftermath. *Obes Surg* 2020;:1.

- 1  
2  
3 16 Cecchetto C, Aiello M, Gentili C, *et al.* Increased emotional eating during COVID-19  
4 associated with lockdown, psychological and social distress. *Appetite* 2021;**160**:105122.  
5  
6 17 Schmitz C. LimeSurvey: An open source survey tool. *LimeSurvey Proj Hambg Ger URL*  
7 *Httpwww Limesurvey Org* 2012.  
8  
9 18 Giorgi G, Perez JML, D'Antonio AC, *et al.* The general health questionnaire (GHQ-12) in a  
10 sample of italian workers: mental health at individual and organizational level. *World J Med Sci*  
11 2014;**11**:47–56.  
12  
13 19 Wang C, Pan R, Wan X, *et al.* Immediate psychological responses and associated factors during  
14 the initial stage of the 2019 coronavirus disease (COVID-19) epidemic among the general  
15 population in china. *Int J Environ Res Public Health* 2020;**17**:1729.  
16  
17 20 Sette S, Le Donne C, Piccinelli R, *et al.* The third National Food Consumption Survey, INRAN-  
18 SCAI 2005–06: major dietary sources of nutrients in Italy. *Int J Food Sci Nutr* 2013;**64**:1014–  
19 21.  
20  
21 21 R Core Team (2019). *R: A language and environment for statistical computing*. R Foundation  
22 for Statistical Computing, Vienna, Austria. <https://www.R-project.org>  
23  
24 22 Harrell FEJ. rms: Regression Modeling Strategies. R package version 4.1-3. Published Online  
25 First: 2014.<http://CRAN.R-project.org/package=rms>  
26  
27 23 Brooks SK, Webster RK, Smith LE, *et al.* The psychological impact of quarantine and how to  
28 reduce it: rapid review of the evidence. *The Lancet* 2020.  
29  
30 24 Amatori S, Donati Zeppa S, Preti A, *et al.* Dietary habits and psychological states during  
31 COVID-19 home isolation in Italian college students: the role of physical exercise. *Nutrients*  
32 2020;**12**:3660.  
33  
34 25 Sidor A, Rzymiski P. Dietary Choices and Habits during COVID-19 Lockdown: Experience  
35 from Poland. *Nutrients* 2020;**12**:1657.  
36  
37 26 Scarmozzino F, Visioli F. Covid-19 and the Subsequent Lockdown Modified Dietary Habits of  
38 Almost Half the Population in an Italian Sample. *Foods* 2020;**9**:675.  
39  
40 27 Pietrobelli A, Pecoraro L, Ferruzzi A, *et al.* Effects of COVID-19 lockdown on lifestyle  
41 behaviors in children with obesity living in Verona, Italy: a longitudinal study. *Obesity* 2020.  
42  
43 28 Karatzias T, Shevlin M, Murphy J, *et al.* Posttraumatic Stress Symptoms and Associated  
44 Comorbidity During the COVID-19 Pandemic in Ireland: A Population-Based Study. *J Trauma*  
45 *Stress* 2020;**33**:365–70.  
46  
47 29 Solomou I, Constantinidou F. Prevalence and predictors of anxiety and depression symptoms  
48 during the COVID-19 pandemic and compliance with precautionary measures: Age and sex  
49 matter. *Int J Environ Res Public Health* 2020;**17**:4924.  
50  
51 30 CREA, Centro di ricerca alimenti e nutrizione. *Dietary Guidelines for Healthy Eating– Revision*  
52 *2018 (Italian: Linee Guida per una sana alimentazione - Revisione 2018)*. 2018.  
53 [https://www.crea.gov.it/documents/59764/0/LINEE-GUIDA+DEFINITIVO+\(1\).pdf/3c13ff3d-](https://www.crea.gov.it/documents/59764/0/LINEE-GUIDA+DEFINITIVO+(1).pdf/3c13ff3d-74dc-88d7-0985-4678aec18537?t=1579191262173)  
54 [74dc-88d7-0985-4678aec18537?t=1579191262173](https://www.crea.gov.it/documents/59764/0/LINEE-GUIDA+DEFINITIVO+(1).pdf/3c13ff3d-74dc-88d7-0985-4678aec18537?t=1579191262173) (accessed 6 Apr 2020).  
55  
56  
57  
58  
59  
60

Table 1. Respondents' characteristics and habits according to GHQ score;  $\geq 14$  (psychological distress)

|                                        | N    | 0-13<br>(N=507) | 14-36<br>(N=3931) | Combined<br>(N=4438) | P-value |
|----------------------------------------|------|-----------------|-------------------|----------------------|---------|
| Age                                    | 4438 | 26/34/48        | 26/38/53          | 26/37/53             | <0.001  |
| Gender: Female                         | 4438 | 59% (300)       | 64% (2502)        | 63% (2802)           | 0.049   |
| Male                                   |      | 41% (207)       | 36% (1429)        | 37% (1636)           |         |
| Nationality: Other                     | 4438 | 2% (8)          | 1% (53)           | 1% (61)              | 0.676   |
| Italian                                |      | 98% (499)       | 99% (3878)        | 99% (4377)           |         |
| Region: High COVID-19 incidence        | 4427 | 48% (242)       | 45% (1780)        | 46% (2022)           | 0.282   |
| Low COVID-19 incidence                 |      | 52% (263)       | 55% (2142)        | 54% (2405)           |         |
| Educational level: Secondary education | 4438 | 49% (249)       | 47% (1831)        | 47% (2080)           | 0.493   |
| University education                   |      | 50% (256)       | 53% (2089)        | 53% (2345)           |         |
| Primary education                      |      | 0% (2)          | 0% (11)           | 0% (13)              |         |
| Working status: Active employee        | 4438 | 71% (360)       | 67% (2630)        | 67% (2990)           | 0.001   |
| Unemployed/Retired/Homemaker           |      | 8% (42)         | 14% (568)         | 14% (610)            |         |
| Student                                |      | 21% (105)       | 19% (733)         | 19% (838)            |         |
| House type: Multi-family house         | 4438 | 64% (325)       | 66% (2589)        | 66% (2914)           | 0.221   |
| Single room apartment                  |      | 3% (16)         | 2% (79)           | 2% (95)              |         |
| Single-family house                    |      | 33% (166)       | 32% (1263)        | 32% (1429)           |         |
| Garden: No                             | 4438 | 39% (198)       | 42% (1658)        | 42% (1856)           | 0.180   |
| Yes                                    |      | 61% (309)       | 58% (2273)        | 58% (2582)           |         |
| Nasopharyngeal swab: No                | 2873 | 96% (278)       | 93% (2391)        | 93% (2669)           | 0.038   |
| Yes                                    |      | 4% (12)         | 7% (192)          | 7% (204)             |         |
| Recent loss: No                        | 2858 | 91% (266)       | 89% (2289)        | 89% (2555)           | 0.240   |
| Yes                                    |      | 9% (25)         | 11% (278)         | 11% (303)            |         |
| Living alone: No                       | 4438 | 88% (448)       | 88% (3469)        | 88% (3917)           | 0.939   |
| Yes                                    |      | 12% (59)        | 12% (462)         | 12% (521)            |         |
| Pet: No                                | 4438 | 54% (274)       | 54% (2112)        | 54% (2386)           | 0.893   |
| Yes                                    |      | 46% (233)       | 46% (1819)        | 46% (2052)           |         |
| Physical activity: No                  | 3991 | 44% (203)       | 57% (2024)        | 56% (2227)           | <0.001  |

|                                              | Yes  | 56% (259) | 43% (1505) | 44% (1764) |       |
|----------------------------------------------|------|-----------|------------|------------|-------|
| <hr/>                                        |      |           |            |            |       |
| Dietary habits (weekly consumption)          |      |           |            |            |       |
| <hr/>                                        |      |           |            |            |       |
| Pasta, Rice, Cereals                         | 3987 | 5/7/10    | 5/7/10     | 5/7/10     | 0.705 |
| Cereal-based products                        | 3984 | 3/7/7     | 4/7/7      | 3/7/7      | 0.214 |
| Raw meat                                     | 3985 | 2/3/4     | 2/3/4      | 2/3/4      | 0.299 |
| Cured meat                                   | 3981 | 1/2/3     | 1/2/3      | 1/2/3      | 0.050 |
| Fish                                         | 3985 | 1/2/2     | 1/2/2      | 1/2/2      | 0.864 |
| Milk and yogurt                              | 3982 | 2/7/7     | 2/7/7      | 2/7/7      | 0.971 |
| Milk-based products                          | 3984 | 2/3/5     | 2/3/5      | 2/3/5      | 0.675 |
| Fruit                                        | 3985 | 4/7/10    | 4/7/10     | 4/7/10     | 0.699 |
| Dried fruit                                  | 3981 | 0/2/5     | 0/2/5      | 0/2/5      | 0.249 |
| Vegetables                                   | 3984 | 6/7/14    | 6/7/14     | 6/7/14     | 0.003 |
| Legumes                                      | 3982 | 1/2/5     | 1/2/4      | 1/2/4      | 0.002 |
| Eggs                                         | 3984 | 1/2/3     | 1/2/2      | 1/2/2      | 0.100 |
| Foods high in fat and sugar                  | 3980 | 1/3/6     | 2/4/7      | 2/3/7      | 0.158 |
| Soft drinks                                  | 3979 | 0/0/1     | 0/0/1      | 0/0/1      | 0.478 |
| Alcoholic drinks (e.g., wine, beer, spirits) | 3981 | 0/1/3     | 0/1/4      | 0/1/4      | 0.080 |
| <hr/>                                        |      |           |            |            |       |

For peer review only



Table 2. Respondents' characteristics and habits according to CES-D score; 0-15 (no/mild depressive symptoms), 16-23 (moderate depressive symptoms), and 24-60 (severe depressive symptoms)

|                                        | N    | 0-15<br>(N=2179) | 16-23<br>(N=1057) | 24-60<br>(N=909) | Combined<br>(N=4145) | P-value |
|----------------------------------------|------|------------------|-------------------|------------------|----------------------|---------|
| Age                                    | 4145 | 29/43/57         | 25/34/50          | 23/29/44         | 26/37/53             | <0.001  |
| Gender: Female                         | 4145 | 53% (1165)       | 70% (740)         | 80% (729)        | 64% (2634)           | <0.001  |
| Male                                   |      | 47% (1014)       | 30% (317)         | 20% (180)        | 36% (1511)           |         |
| Nationality: Other                     | 4145 | 1% (27)          | 2% (17)           | 1% (9)           | 1% (53)              | 0.464   |
| Italian                                |      | 99% (2152)       | 98% (1040)        | 99% (900)        | 99% (4092)           |         |
| Region: High COVID-19 incidence        | 4135 | 45% (976)        | 44% (464)         | 48% (431)        | 45% (1871)           | 0.258   |
| Low COVID-19 incidence                 |      | 55% (1200)       | 56% (589)         | 52% (475)        | 55% (2264)           |         |
| Educational level: Secondary education | 4145 | 45% (976)        | 44% (464)         | 52% (476)        | 46% (1916)           | <0.001  |
| University education                   |      | 55% (1196)       | 56% (593)         | 47% (431)        | 54% (2220)           |         |
| Primary education                      |      | 0% (7)           | 0% (0)            | 0% (2)           | 0% (9)               |         |
| Working status: Active employee        | 4145 | 73% (1583)       | 67% (709)         | 57% (521)        | 68% (2813)           | <0.001  |
| Unemployed/Retired/Homemaker           |      | 16% (338)        | 12% (130)         | 12% (111)        | 14% (579)            |         |
| Student                                |      | 12% (258)        | 21% (218)         | 30% (277)        | 18% (753)            |         |
| House type: Multi-family house         | 4145 | 63% (1369)       | 68% (715)         | 69% (628)        | 65% (2712)           | 0.001   |
| Single room apartment                  |      | 2% (40)          | 2% (23)           | 3% (25)          | 2% (88)              |         |
| Single-family house                    |      | 35% (770)        | 30% (319)         | 28% (256)        | 32% (1345)           |         |
| Garden: No                             | 4145 | 36% (781)        | 44% (467)         | 52% (475)        | 42% (1723)           | <0.001  |
| Yes                                    |      | 64% (1398)       | 56% (590)         | 48% (434)        | 58% (2422)           |         |
| Nasopharyngeal swab: No                | 2684 | 92% (1223)       | 92% (612)         | 95% (660)        | 93% (2495)           | 0.023   |
| Yes                                    |      | 8% (106)         | 8% (50)           | 5% (33)          | 7% (189)             |         |
| Recent loss: No                        | 2665 | 90% (1194)       | 89% (584)         | 88% (606)        | 89% (2384)           | 0.277   |
| Yes                                    |      | 10% (127)        | 11% (73)          | 12% (81)         | 11% (281)            |         |
| Living alone: No                       | 4145 | 89% (1937)       | 89% (937)         | 86% (778)        | 88% (3652)           | 0.029   |
| Yes                                    |      | 11% (242)        | 11% (120)         | 14% (131)        | 12% (493)            |         |
| Pet: No                                | 4145 | 54% (1179)       | 53% (565)         | 52% (470)        | 53% (2214)           | 0.475   |
| Yes                                    |      | 46% (1000)       | 47% (492)         | 48% (439)        | 47% (1931)           |         |

1  
2  
3  
4  
5  
6  
7  
8  
9  
10  
11  
12  
13  
14  
15  
16  
17  
18  
19  
20  
21  
22  
23  
24  
25  
26  
27  
28  
29  
30  
31  
32  
33  
34  
35  
36  
37  
38  
39  
40  
41  
42  
43  
44  
45  
46

|                                              |      |            |           |           |            |        |
|----------------------------------------------|------|------------|-----------|-----------|------------|--------|
| Physical activity: No                        | 3991 | 53% (1123) | 56% (573) | 61% (531) | 56% (2227) | 0.001  |
| Yes                                          |      | 47% (981)  | 44% (445) | 39% (338) | 44% (1764) |        |
| <i>Dietary habits (weekly consumption)</i>   |      |            |           |           |            |        |
| Pasta, Rice, Cereals                         | 3987 | 5/7/10     | 5/7/10    | 5/7/10    | 5/7/10     | 0.182  |
| Cereal-based products                        | 3984 | 3/7/7      | 4/7/7     | 4/7/7     | 3/7/7      | 0.135  |
| Raw meat                                     | 3985 | 2/3/4      | 2/3/4     | 2/3/4     | 2/3/4      | 0.418  |
| Cured meat                                   | 3981 | 1/2/3      | 1/2/3     | 1/2/3     | 1/2/3      | 0.243  |
| Fish                                         | 3985 | 1/2/2      | 1/2/2     | 1/2/2     | 1/2/2      | 0.003  |
| Milk and yogurt                              | 3982 | 1/7/7      | 2/7/7     | 2/7/7     | 2/7/7      | 0.309  |
| Milk-based products                          | 3984 | 2/3/5.25   | 2/3/5     | 1/3/5     | 2/3/5      | <0.001 |
| Fruit                                        | 3985 | 5/7/12     | 3/7/10    | 3/7/10    | 4/7/10     | <0.001 |
| Dried fruit                                  | 3981 | 0/2/5      | 0/2/5     | 0/1/4     | 0/2/5      | <0.001 |
| Vegetables                                   | 3984 | 6/7/14     | 5/7/14    | 5/7/14    | 6/7/14     | 0.013  |
| Legumes                                      | 3982 | 1/3/4      | 2/3/4     | 1/2/4     | 1/3/4      | 0.059  |
| Eggs                                         | 3984 | 1/2/2      | 1/2/2     | 1/2/2     | 1/2/2      | 0.442  |
| Foods high in fat and sugar                  | 3980 | 1/3/6      | 2/4/7     | 2/4/7     | 2/3/7      | 0.008  |
| Soft drinks                                  | 3979 | 0/0/1      | 0/0/1     | 0/0/1     | 0/0/1      | 0.002  |
| Alcoholic drinks (e.g., wine, beer, spirits) | 3981 | 0/2/5      | 0/1/4     | 0/1/3     | 0/1/4      | <0.001 |

For peer review only

Table 3. Respondents' characteristics and habits according to IESD-R score; 0–23 (normal), 24–32 (mild psychological impact), 33–36 (moderate psychological impact), and  $\geq 37$  (severe psychological impact)

|                                        | N    | 0-23<br>(N=2463) | 24-32<br>(N=827) | 33-36<br>(N=242) | $\geq 37$<br>(N=762) | Combined<br>(N=4294) | P-value |
|----------------------------------------|------|------------------|------------------|------------------|----------------------|----------------------|---------|
| Age                                    | 4294 | 27/40/55         | 26/37/53         | 25/33/49         | 25/33/47             | 26/37/53             | <0.001  |
| Gender: Female                         | 4294 | 52% (1279)       | 73% (600)        | 85% (205)        | 83% (633)            | 63% (2717)           | <0.001  |
| Male                                   |      | 48% (1184)       | 27% (227)        | 15% (37)         | 17% (129)            | 37% (1577)           |         |
| Nationality: Other                     | 4294 | 1% (30)          | 1% (12)          | 1% (3)           | 1% (10)              | 1% (55)              | 0.965   |
| Italian                                |      | 99% (2433)       | 99% (815)        | 99% (239)        | 99% (752)            | 99% (4239)           |         |
| Region: High COVID-19 incidence        | 4284 | 44% (1090)       | 47% (385)        | 48% (115)        | 47% (357)            | 45% (1947)           | 0.377   |
| Low COVID-19 incidence                 |      | 56% (1370)       | 53% (440)        | 52% (127)        | 53% (400)            | 55% (2337)           |         |
| Educational level: Secondary education | 4294 | 44% (1087)       | 48% (397)        | 50% (121)        | 51% (390)            | 46% (1995)           | 0.009   |
| University education                   |      | 56% (1368)       | 52% (430)        | 50% (120)        | 48% (369)            | 53% (2287)           |         |
| Primary education                      |      | 0% (8)           | 0% (0)           | 0% (1)           | 0% (3)               | 0% (12)              |         |
| Working status: Active employee        | 4294 | 70% (1720)       | 66% (543)        | 62% (151)        | 65% (494)            | 68% (2908)           | 0.001   |
| Unemployed/Retired/Homemaker           |      | 14% (349)        | 14% (115)        | 14% (34)         | 13% (100)            | 14% (598)            |         |
| Student                                |      | 16% (394)        | 20% (169)        | 24% (57)         | 22% (168)            | 18% (788)            |         |
| House type: Multi-family house         | 4294 | 64% (1586)       | 65% (538)        | 76% (183)        | 67% (512)            | 66% (2819)           | 0.003   |
| Single room apartment                  |      | 2% (49)          | 2% (19)          | 1% (2)           | 3% (25)              | 2% (95)              |         |
| Single-family house                    |      | 34% (828)        | 33% (270)        | 24% (57)         | 30% (225)            | 32% (1380)           |         |
| Garden: No                             | 4294 | 38% (935)        | 43% (355)        | 52% (126)        | 49% (375)            | 42% (1791)           | <0.001  |
| Yes                                    |      | 62% (1528)       | 57% (472)        | 48% (116)        | 51% (387)            | 58% (2503)           |         |
| Nasopharyngeal swab: No                | 2774 | 93% (1482)       | 92% (454)        | 93% (151)        | 95% (491)            | 93% (2578)           | 0.418   |
| Yes                                    |      | 7% (120)         | 8% (37)          | 7% (11)          | 5% (28)              | 7% (196)             |         |
| Recent loss: No                        | 2759 | 91% (1458)       | 87% (423)        | 88% (139)        | 87% (452)            | 90% (2472)           | 0.004   |
| Yes                                    |      | 9% (137)         | 13% (64)         | 12% (19)         | 13% (67)             | 10% (287)            |         |
| Living alone: No                       | 4294 | 88% (2170)       | 89% (737)        | 88% (214)        | 87% (663)            | 88% (3784)           | 0.635   |
| Yes                                    |      | 12% (293)        | 11% (90)         | 12% (28)         | 13% (99)             | 12% (510)            |         |
| Pet: No                                | 4294 | 54% (1332)       | 52% (426)        | 63% (152)        | 52% (397)            | 54% (2307)           | 0.014   |

1  
2  
3  
4  
5  
6  
7  
8  
9  
10  
11  
12  
13  
14  
15  
16  
17  
18  
19  
20  
21  
22  
23  
24  
25  
26  
27  
28  
29  
30  
31  
32  
33  
34  
35  
36  
37  
38  
39  
40  
41  
42  
43  
44  
45  
46

|                                              |      |            |           |           |           |            |        |
|----------------------------------------------|------|------------|-----------|-----------|-----------|------------|--------|
| Yes                                          |      | 46% (1131) | 48% (401) | 37% (90)  | 48% (365) | 46% (1987) |        |
| Physical activity: No                        | 3991 | 53% (1220) | 58% (443) | 59% (132) | 61% (432) | 56% (2227) | <0.001 |
| Yes                                          |      | 47% (1081) | 42% (317) | 41% (93)  | 39% (273) | 44% (1764) |        |
| <hr/>                                        |      |            |           |           |           |            |        |
| Dietary habits (weekly consumption)          |      |            |           |           |           |            |        |
| <hr/>                                        |      |            |           |           |           |            |        |
| Pasta, Rice, Cereals                         | 3987 | 5/7/10     | 6/7/10    | 5/7/10    | 5/7/10    | 5/7/10     | 0.560  |
| Cereal-based products                        | 3984 | 3/7/7      | 4/7/7     | 4/7/7     | 4/7/7     | 3/7/7      | 0.018  |
| Raw meat                                     | 3985 | 2/3/4      | 2/3/4     | 2/3/4     | 2/3/4     | 2/3/4      | 0.150  |
| Cured meat                                   | 3981 | 1/2/3      | 1/2/3     | 1/2/3     | 1/2/3     | 1/2/3      | 0.404  |
| Fish                                         | 3985 | 1/2/2      | 1/2/2     | 1/1/2     | 1/2/2     | 1/2/2      | 0.443  |
| Milk and yogurt                              | 3982 | 2/7/7      | 2/6/7     | 2/7/7     | 2/6/7     | 2/7/7      | 0.398  |
| Milk-based products                          | 3984 | 2/3/5      | 2/3/5     | 1/3/5     | 2/3/5     | 2/3/5      | 0.002  |
| Fruit                                        | 3985 | 4/7/10     | 4/7/10    | 3/7/14    | 3/7/8.75  | 4/7/10     | 0.003  |
| Dried fruit                                  | 3981 | 0/2/5      | 0/2/5     | 0/1/5     | 0/2/4     | 0/2/5      | 0.061  |
| Vegetables                                   | 3984 | 6/7/14     | 6/7/14    | 6/7/14    | 5/7/14    | 6/7/14     | 0.043  |
| Legumes                                      | 3982 | 1/3/4      | 1/2/4     | 1/2/4     | 1/2/4     | 1/3/4      | 0.710  |
| Eggs                                         | 3984 | 1/2/2      | 1/2/2     | 1/2/2     | 1/2/3     | 1/2/2      | 0.836  |
| Foods high in fat and sugar                  | 3980 | 1/3/6      | 2/3/6     | 2/4/7     | 2/4/7     | 2/3/7      | 0.012  |
| Soft drinks                                  | 3979 | 0/0/1      | 0/0/1     | 0/0/1     | 0/0/2     | 0/0/1      | <0.001 |
| Alcoholic drinks (e.g., wine, beer, spirits) | 3981 | 0/2/4      | 0/1/3     | 0/1/3     | 0/1/3     | 0/1/4      | <0.001 |
| <hr/>                                        |      |            |           |           |           |            |        |

For peer review only

Table 4. Results of the multivariable models (proportional odds model for the ordinal responses with more than two categories, i.e., CES-D and IES-R, logistic regression model for the binary response variable, i.e., GHQ-12). For continuous variables, the effect is reported on the interquartile range (IQR), i.e., 26-54 for age and 3-20 for days from the start of the survey). Results are reported as odds ratios (logistic regression) or proportional odds (proportional odds model), 95% confidence intervals (CI), P-value

Supplementary Material

|                                                                  | OR   | Lower 0.95 | Upper 0.95 |
|------------------------------------------------------------------|------|------------|------------|
| <i>GHQ</i>                                                       |      |            |            |
| Days from the start of the survey                                | 1.19 | 0.95       | 1.49       |
| Gender: Male vs. Female                                          | 0.77 | 0.63       | 0.94       |
| Region: Low-incidence vs. High-incidence                         | 0.87 | 0.72       | 1.06       |
| Working status: Unemployed/Retired/Homemaker vs. Active employee | 1.99 | 1.4        | 2.85       |
| Working status: Student vs. Active employee                      | 1.10 | 0.85       | 1.43       |
| Physical activity: Yes vs. No                                    | 0.56 | 0.46       | 0.69       |
| <i>CES-D</i>                                                     |      |            |            |
| Days from the start of the survey                                | 1.38 | 1.00       | 1.89       |
| Age                                                              | 0.39 | 0.32       | 0.48       |
| Gender: Male vs. Female                                          | 0.46 | 0.39       | 0.55       |
| Working status: Unemployed/Retired/Homemaker vs. Active employee | 1.57 | 1.22       | 2.02       |
| Working status: Student vs. Active employee                      | 1.73 | 1.31       | 2.28       |
| Garden: No vs. Yes                                               | 1.72 | 1.46       | 2.01       |
| Recent Loss: Yes vs. No                                          | 1.35 | 1.05       | 1.72       |
| Living alone: Yes vs. No                                         | 1.50 | 1.17       | 1.91       |
| Physical activity: Yes vs. No                                    | 0.64 | 0.55       | 0.75       |
| <i>IES-R</i>                                                     |      |            |            |
| Days from the start of the survey                                | 1.03 | 0.75       | 1.42       |
| Age                                                              | 0.67 | 0.58       | 0.78       |
| Gender: Male vs. Female                                          | 0.30 | 0.25       | 0.37       |
| Educational level: Secondary vs. University                      | 1.29 | 1.10       | 1.52       |

|    |                                           |      |      |      |
|----|-------------------------------------------|------|------|------|
| 1  |                                           |      |      |      |
| 2  | Educational level: Primary vs. University | 0.48 | 0.05 | 4.55 |
| 3  | Garden: No vs. Yes                        | 1.55 | 1.33 | 1.82 |
| 4  | Recent Loss: Yes vs. No                   | 1.63 | 1.28 | 2.09 |
| 5  | Physical activity: Yes vs. No             | 0.72 | 0.61 | 0.84 |
| 6  |                                           |      |      |      |
| 7  |                                           |      |      |      |
| 8  |                                           |      |      |      |
| 9  |                                           |      |      |      |
| 10 |                                           |      |      |      |
| 11 |                                           |      |      |      |
| 12 |                                           |      |      |      |
| 13 |                                           |      |      |      |
| 14 |                                           |      |      |      |
| 15 |                                           |      |      |      |
| 16 |                                           |      |      |      |
| 17 |                                           |      |      |      |
| 18 |                                           |      |      |      |
| 19 |                                           |      |      |      |
| 20 |                                           |      |      |      |
| 21 |                                           |      |      |      |
| 22 |                                           |      |      |      |
| 23 |                                           |      |      |      |
| 24 |                                           |      |      |      |
| 25 |                                           |      |      |      |
| 26 |                                           |      |      |      |
| 27 |                                           |      |      |      |
| 28 |                                           |      |      |      |
| 29 |                                           |      |      |      |
| 30 |                                           |      |      |      |
| 31 |                                           |      |      |      |
| 32 |                                           |      |      |      |
| 33 |                                           |      |      |      |
| 34 |                                           |      |      |      |
| 35 |                                           |      |      |      |
| 36 |                                           |      |      |      |
| 37 |                                           |      |      |      |
| 38 |                                           |      |      |      |
| 39 |                                           |      |      |      |
| 40 |                                           |      |      |      |
| 41 |                                           |      |      |      |
| 42 |                                           |      |      |      |
| 43 |                                           |      |      |      |
| 44 |                                           |      |      |      |
| 45 |                                           |      |      |      |
| 46 |                                           |      |      |      |

For peer review only

Table S1. Respondents' characteristics and habits according to residency; high COVID-19 incidence regions (i.e., Piemonte, Veneto, Lombardia, Emilia-Romagna) and low COVID-19 incidence regions.

|                                            | N    | Low COVID-19 Incidence<br>(N=2301) | High COVID-19 Incidence<br>(N=2677) | Combined<br>(N=4978) | P-value |
|--------------------------------------------|------|------------------------------------|-------------------------------------|----------------------|---------|
| Age                                        | 4978 | 25/36/53                           | 27/39/55                            | 26/38/54             | <0.001  |
| Gender: Female                             | 4974 | 63% (1454)                         | 63% (1676)                          | 63% (3130)           | 0.614   |
| Male                                       |      | 37% (43)                           | 37% (1001)                          | 37% (1844)           |         |
| Nationality: Other                         | 4977 | 2% (42)                            | 1% (31)                             | 1% (73)              | 0.051   |
| Italian                                    |      | 98% (2259)                         | 99% (2645)                          | 99% (4904)           |         |
| Educational level: Secondary education     | 4973 | 51% (1175)                         | 45% (1193)                          | 48% (2368)           | <0.001  |
| University education                       |      | 48% (1113)                         | 55% (1475)                          | 52% (2588)           |         |
| Primary education                          |      | 0% (10)                            | 0% (7)                              | 0% (17)              |         |
| Working status: Active employee            | 4972 | 63% (1442)                         | 70% (1877)                          | 67% (3319)           | <0.001  |
| Unemployed/Retired/Homemaker               |      | 16% (376)                          | 13% (360)                           | 15% (736)            |         |
| Student                                    |      | 21% (481)                          | 16% (436)                           | 18% (917)            |         |
| House type: Multi-family house             | 4969 | 72% (1660)                         | 60% (1603)                          | 66% (3263)           | <0.001  |
| Single room apartment                      |      | 3% (60)                            | 2% (51)                             | 2% (111)             |         |
| Single-family house                        |      | 25% (579)                          | 38% (1016)                          | 32% (1595)           |         |
| Garden: No                                 | 4967 | 50% (1150)                         | 35% (932)                           | 42% (2082)           | <0.001  |
| Yes                                        |      | 50% (1147)                         | 65% (1738)                          | 58% (2885)           |         |
| Nasopharyngeal swab: No                    | 3221 | 97% (1371)                         | 90% (1623)                          | 93% (2994)           | <0.001  |
| Yes                                        |      | 3% (39)                            | 10% (188)                           | 7% (227)             |         |
| Recent loss: No                            | 3208 | 90% (1267)                         | 89% (1604)                          | 89% (2871)           | 0.186   |
| Yes                                        |      | 10% (136)                          | 11% (201)                           | 11% (337)            |         |
| Living alone: No                           | 4870 | 89% (1995)                         | 88% (2315)                          | 89% (4310)           | 0.196   |
| Yes                                        |      | 11% (243)                          | 12% (317)                           | 11% (560)            |         |
| Physical activity: No                      | 3981 | 55% (971)                          | 57% (1251)                          | 56% (2222)           | 0.159   |
| Yes                                        |      | 45% (808)                          | 43% (951)                           | 44% (1759)           |         |
| <i>Dietary habits (weekly consumption)</i> |      |                                    |                                     |                      |         |

|    |                                              |      |          |        |        |        |
|----|----------------------------------------------|------|----------|--------|--------|--------|
| 1  |                                              |      |          |        |        |        |
| 2  | Pasta, Rice, Cereals                         | 3977 | 5/7/10   | 5/7/10 | 5/7/10 | 0.215  |
| 3  | Cereal-based products                        | 3974 | 3/7/7    | 4/7/7  | 4/7/7  | <0.001 |
| 4  | Raw meat                                     | 3975 | 2/3/4.25 | 2/3/4  | 2/3/4  | 0.005  |
| 5  | Cured meat                                   | 3971 | 1/2/3    | 1/2/3  | 1/2/3  | <0.001 |
| 6  | Fish                                         | 3975 | 1/2/3    | 1/1/2  | 1/2/2  | <0.001 |
| 7  | Milk and yogurt                              | 3972 | 2/7/7    | 2/7/7  | 2/7/7  | 0.782  |
| 8  | Milk-based products                          | 3974 | 2/3/5    | 2/3/5  | 2/3/5  | 0.017  |
| 9  | Fruit                                        | 3975 | 4/7/10   | 4/7/12 | 4/7/10 | <0.001 |
| 10 | Dried fruit                                  | 3971 | 0/2/5    | 0/2/5  | 0/2/5  | 0.250  |
| 11 | Vegetables                                   | 3974 | 5/7/14   | 6/7/14 | 6/7/14 | <0.001 |
| 12 | Legumes                                      | 3972 | 2/3/4    | 1/2/4  | 1/3/4  | 0.005  |
| 13 | Eggs                                         | 3974 | 1/2/3    | 1/2/2  | 1/2/2  | 0.014  |
| 14 | Food high in fat and sugar                   | 3970 | 1/3/6    | 2/4/7  | 2/3/7  | 0.241  |
| 15 | Soft drinks                                  | 3969 | 0/0/1    | 0/0/1  | 0/0/1  | 0.969  |
| 16 | Alcoholic drinks (e.g., wine, beer, spirits) | 3971 | 0/1/4    | 0/1/4  | 0/1/4  | 0.001  |
| 17 |                                              |      |          |        |        |        |
| 18 |                                              |      |          |        |        |        |
| 19 |                                              |      |          |        |        |        |
| 20 |                                              |      |          |        |        |        |
| 21 |                                              |      |          |        |        |        |
| 22 |                                              |      |          |        |        |        |
| 23 |                                              |      |          |        |        |        |
| 24 |                                              |      |          |        |        |        |
| 25 |                                              |      |          |        |        |        |
| 26 |                                              |      |          |        |        |        |
| 27 |                                              |      |          |        |        |        |
| 28 |                                              |      |          |        |        |        |
| 29 |                                              |      |          |        |        |        |
| 30 |                                              |      |          |        |        |        |
| 31 |                                              |      |          |        |        |        |
| 32 |                                              |      |          |        |        |        |
| 33 |                                              |      |          |        |        |        |
| 34 |                                              |      |          |        |        |        |
| 35 |                                              |      |          |        |        |        |
| 36 |                                              |      |          |        |        |        |
| 37 |                                              |      |          |        |        |        |
| 38 |                                              |      |          |        |        |        |
| 39 |                                              |      |          |        |        |        |
| 40 |                                              |      |          |        |        |        |
| 41 |                                              |      |          |        |        |        |
| 42 |                                              |      |          |        |        |        |
| 43 |                                              |      |          |        |        |        |
| 44 |                                              |      |          |        |        |        |
| 45 |                                              |      |          |        |        |        |
| 46 |                                              |      |          |        |        |        |

For peer review only



Figure S1. Survey response report. The weekly response rate over the website accesses has been reported in Panel A where the dotted line represents the overall response rate (84.5%). Panel B represents the number of responses per day; Panel C reports the number of website accesses per day. The Number of responses per region is shown in panel C.

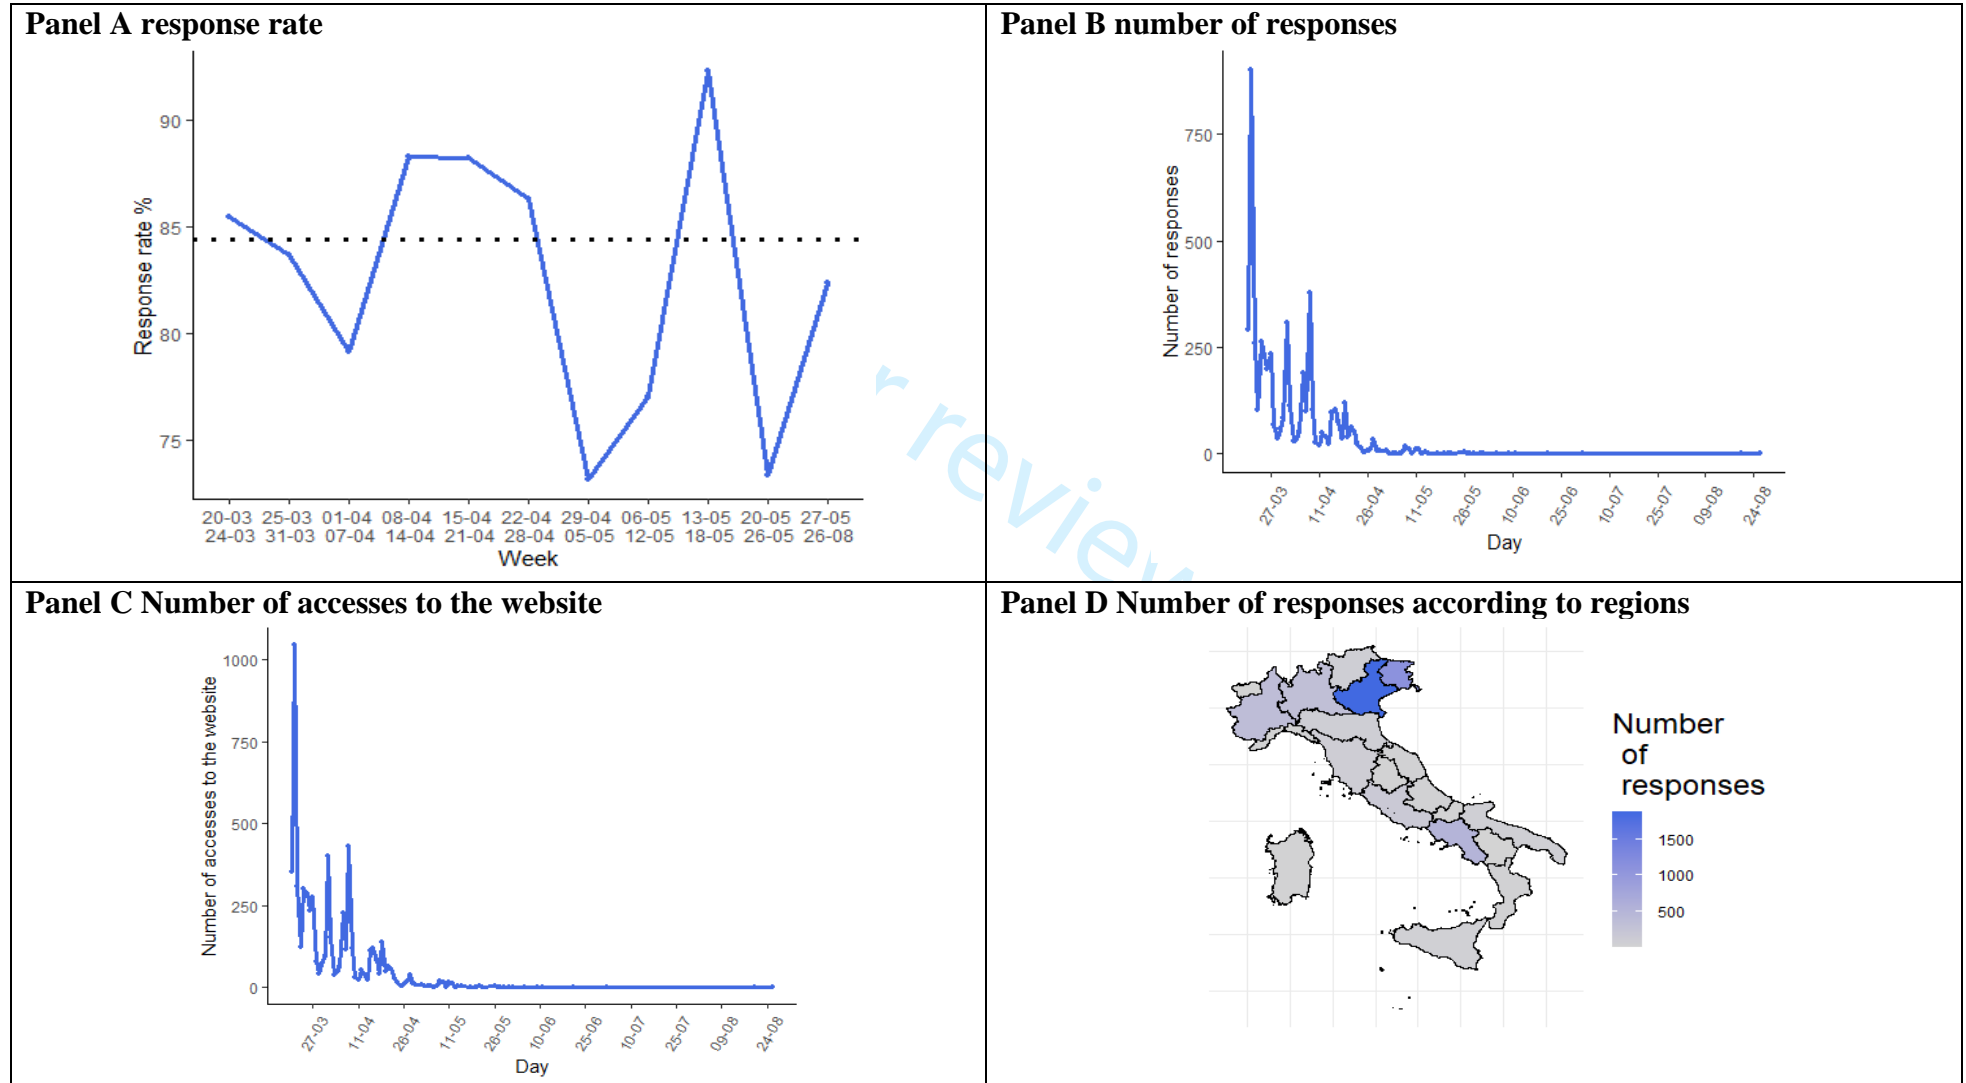

Figure S2. Missing Responses report. Percentage of responses presenting with missing data per region. The dotted line represents the percentage of responses with missing data overall (29.9%).

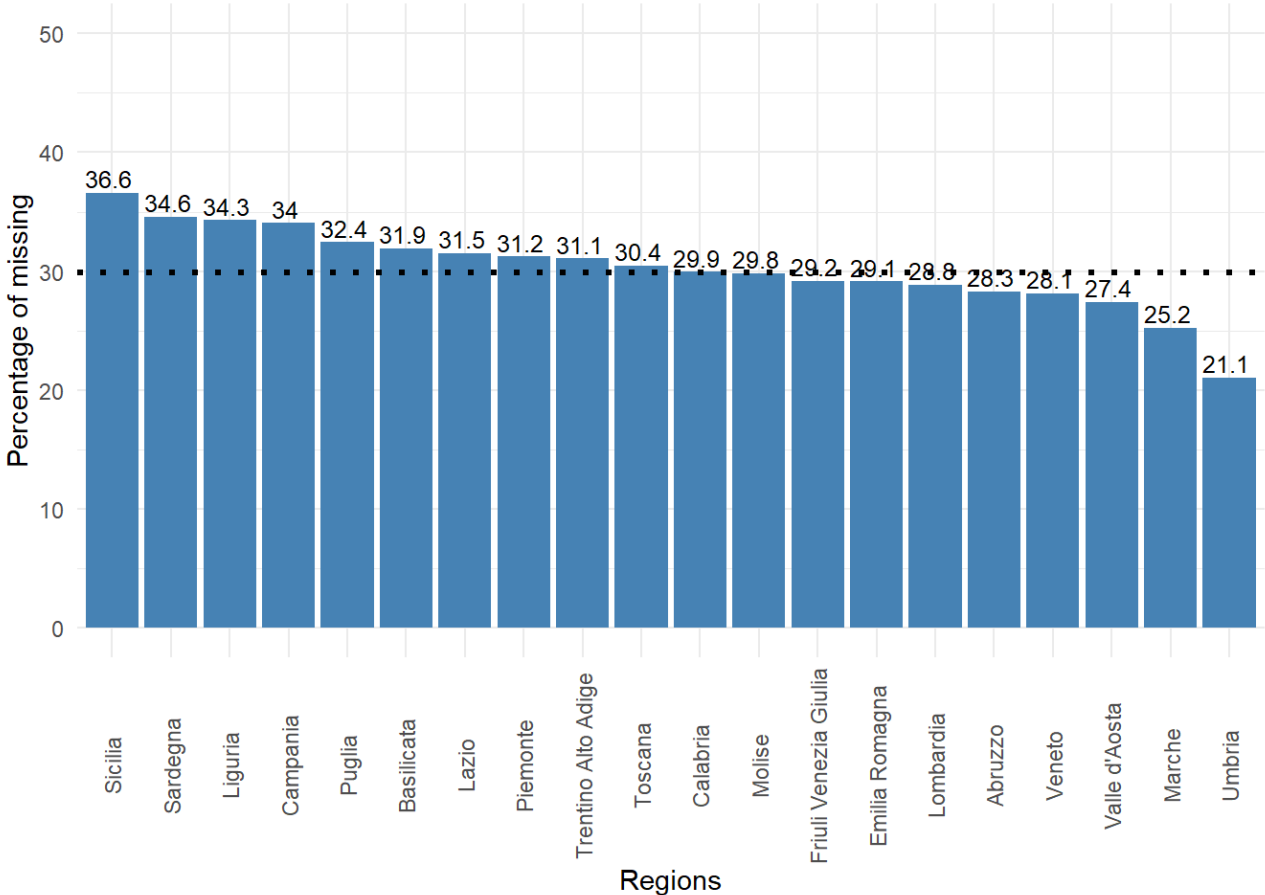

**STROBE 2007 (v4) Statement—Checklist of items that should be included in reports of *cross-sectional studies***

| Section/Topic                | Item # | Recommendation                                                                                                                                                                       | Reported on page # |
|------------------------------|--------|--------------------------------------------------------------------------------------------------------------------------------------------------------------------------------------|--------------------|
| <b>Title and abstract</b>    | 1      | (a) Indicate the study's design with a commonly used term in the title or the abstract                                                                                               | 1-3                |
|                              |        | (b) Provide in the abstract an informative and balanced summary of what was done and what was found                                                                                  | 3                  |
| <b>Introduction</b>          |        |                                                                                                                                                                                      |                    |
| Background/rationale         | 2      | Explain the scientific background and rationale for the investigation being reported                                                                                                 | 5                  |
| Objectives                   | 3      | State specific objectives, including any prespecified hypotheses                                                                                                                     | 5                  |
| <b>Methods</b>               |        |                                                                                                                                                                                      |                    |
| Study design                 | 4      | Present key elements of study design early in the paper                                                                                                                              | 5-6                |
| Setting                      | 5      | Describe the setting, locations, and relevant dates, including periods of recruitment, exposure, follow-up, and data collection                                                      | 6                  |
| Participants                 | 6      | (a) Give the eligibility criteria, and the sources and methods of selection of participants                                                                                          | 6                  |
| Variables                    | 7      | Clearly define all outcomes, exposures, predictors, potential confounders, and effect modifiers. Give diagnostic criteria, if applicable                                             | 6                  |
| Data sources/<br>measurement | 8*     | For each variable of interest, give sources of data and details of methods of assessment (measurement). Describe comparability of assessment methods if there is more than one group | 6                  |
| Bias                         | 9      | Describe any efforts to address potential sources of bias                                                                                                                            | 6                  |
| Study size                   | 10     | Explain how the study size was arrived at                                                                                                                                            | NA                 |
| Quantitative variables       | 11     | Explain how quantitative variables were handled in the analyses. If applicable, describe which groupings were chosen and why                                                         | 7                  |
| Statistical methods          | 12     | (a) Describe all statistical methods, including those used to control for confounding                                                                                                | 7                  |
|                              |        | (b) Describe any methods used to examine subgroups and interactions                                                                                                                  | NA                 |
|                              |        | (c) Explain how missing data were addressed                                                                                                                                          | 7                  |
|                              |        | (d) If applicable, describe analytical methods taking account of sampling strategy                                                                                                   | 7                  |
|                              |        | (e) Describe any sensitivity analyses                                                                                                                                                | NA                 |
| <b>Results</b>               |        |                                                                                                                                                                                      |                    |

|                          |     |                                                                                                                                                                                                              |         |
|--------------------------|-----|--------------------------------------------------------------------------------------------------------------------------------------------------------------------------------------------------------------|---------|
| Participants             | 13* | (a) Report numbers of individuals at each stage of study—eg numbers potentially eligible, examined for eligibility, confirmed eligible, included in the study, completing follow-up, and analysed            | 7       |
|                          |     | (b) Give reasons for non-participation at each stage                                                                                                                                                         | NA      |
|                          |     | (c) Consider use of a flow diagram                                                                                                                                                                           | NA      |
| Descriptive data         | 14* | (a) Give characteristics of study participants (eg demographic, clinical, social) and information on exposures and potential confounders                                                                     | 7       |
|                          |     | (b) Indicate number of participants with missing data for each variable of interest                                                                                                                          | Table 1 |
| Outcome data             | 15* | Report numbers of outcome events or summary measures                                                                                                                                                         | 7       |
| Main results             | 16  | (a) Give unadjusted estimates and, if applicable, confounder-adjusted estimates and their precision (eg, 95% confidence interval). Make clear which confounders were adjusted for and why they were included | 7-8     |
|                          |     | (b) Report category boundaries when continuous variables were categorized                                                                                                                                    | 7-8     |
|                          |     | (c) If relevant, consider translating estimates of relative risk into absolute risk for a meaningful time period                                                                                             | NA      |
| Other analyses           | 17  | Report other analyses done—eg analyses of subgroups and interactions, and sensitivity analyses                                                                                                               | NA      |
| <b>Discussion</b>        |     |                                                                                                                                                                                                              |         |
| Key results              | 18  | Summarise key results with reference to study objectives                                                                                                                                                     | 9       |
| Limitations              | 19  | Discuss limitations of the study, taking into account sources of potential bias or imprecision. Discuss both direction and magnitude of any potential bias                                                   | 10      |
| Interpretation           | 20  | Give a cautious overall interpretation of results considering objectives, limitations, multiplicity of analyses, results from similar studies, and other relevant evidence                                   | 10      |
| Generalisability         | 21  | Discuss the generalisability (external validity) of the study results                                                                                                                                        | 10      |
| <b>Other information</b> |     |                                                                                                                                                                                                              |         |
| Funding                  | 22  | Give the source of funding and the role of the funders for the present study and, if applicable, for the original study on which the present article is based                                                | 11      |

\*Give information separately for cases and controls in case-control studies and, if applicable, for exposed and unexposed groups in cohort and cross-sectional studies.

**Note:** An Explanation and Elaboration article discusses each checklist item and gives methodological background and published examples of transparent reporting. The STROBE checklist is best used in conjunction with this article (freely available on the Web sites of PLoS Medicine at <http://www.plosmedicine.org/>, Annals of Internal Medicine at <http://www.annals.org/>, and Epidemiology at <http://www.epidem.com/>). Information on the STROBE Initiative is available at [www.strobe-statement.org](http://www.strobe-statement.org).

# BMJ Open

## Impact of the COVID-19 lockdown on psychological health and nutritional habits in Italy: results from the #PRESTOinsieme study

|                                 |                                                                                                                                                                                                                                                                                                                                                                                                                                                                                                                                                   |
|---------------------------------|---------------------------------------------------------------------------------------------------------------------------------------------------------------------------------------------------------------------------------------------------------------------------------------------------------------------------------------------------------------------------------------------------------------------------------------------------------------------------------------------------------------------------------------------------|
| Journal:                        | <i>BMJ Open</i>                                                                                                                                                                                                                                                                                                                                                                                                                                                                                                                                   |
| Manuscript ID                   | bmjopen-2021-048916.R2                                                                                                                                                                                                                                                                                                                                                                                                                                                                                                                            |
| Article Type:                   | Original research                                                                                                                                                                                                                                                                                                                                                                                                                                                                                                                                 |
| Date Submitted by the Author:   | 16-Nov-2021                                                                                                                                                                                                                                                                                                                                                                                                                                                                                                                                       |
| Complete List of Authors:       | Lorenzoni, Giulia; University of Padova<br>Azzolina, Danila; University of Padova; University of Ferrara<br>Maresio, Elisabetta; Psychotherapy Unit Prochild Onlus<br>Gallipoli, Silvia; Zeta Research Ltd<br>Ghidina, Marco; Zeta Research Ltd<br>Baldas, Solidea; Prochild Onlus<br>Berchiolla, Paola; Università degli Studi di Torino<br>Giron, Maria Cecilia; University of Padova<br>Silano, Marco; Istituto Superiore di Sanità, Unit of Human Nutrition and Health<br>Gregori, Dario; University of Padova School of Medicine and Surgery |
| <b>Primary Subject Heading</b>: | Public health                                                                                                                                                                                                                                                                                                                                                                                                                                                                                                                                     |
| Secondary Subject Heading:      | Epidemiology                                                                                                                                                                                                                                                                                                                                                                                                                                                                                                                                      |
| Keywords:                       | COVID-19, NUTRITION & DIETETICS, Anxiety disorders < PSYCHIATRY, Public health < INFECTIOUS DISEASES                                                                                                                                                                                                                                                                                                                                                                                                                                              |
|                                 |                                                                                                                                                                                                                                                                                                                                                                                                                                                                                                                                                   |

SCHOLARONE™  
Manuscripts



I, the Submitting Author has the right to grant and does grant on behalf of all authors of the Work (as defined in the below author licence), an exclusive licence and/or a non-exclusive licence for contributions from authors who are: i) UK Crown employees; ii) where BMJ has agreed a CC-BY licence shall apply, and/or iii) in accordance with the terms applicable for US Federal Government officers or employees acting as part of their official duties; on a worldwide, perpetual, irrevocable, royalty-free basis to BMJ Publishing Group Ltd ("BMJ") its licensees and where the relevant Journal is co-owned by BMJ to the co-owners of the Journal, to publish the Work in this journal and any other BMJ products and to exploit all rights, as set out in our [licence](#).

The Submitting Author accepts and understands that any supply made under these terms is made by BMJ to the Submitting Author unless you are acting as an employee on behalf of your employer or a postgraduate student of an affiliated institution which is paying any applicable article publishing charge ("APC") for Open Access articles. Where the Submitting Author wishes to make the Work available on an Open Access basis (and intends to pay the relevant APC), the terms of reuse of such Open Access shall be governed by a Creative Commons licence – details of these licences and which [Creative Commons](#) licence will apply to this Work are set out in our licence referred to above.

Other than as permitted in any relevant BMJ Author's Self Archiving Policies, I confirm this Work has not been accepted for publication elsewhere, is not being considered for publication elsewhere and does not duplicate material already published. I confirm all authors consent to publication of this Work and authorise the granting of this licence.

1  
2  
3 **Impact of the COVID-19 lockdown on psychological health and nutritional habits in Italy:**  
4 **results from the #PRESTOinsieme study**  
5  
6

7 Giulia Lorenzoni <sup>1\*</sup>, Danila Azzolina <sup>1,2\*</sup>, Elisabetta Maresio<sup>3\*</sup>, Silvia Gallipoli <sup>4</sup>, Marco Ghidina <sup>4</sup>,  
8 Solidea Baldas <sup>8</sup>, Paola Berchiolla <sup>5</sup>, Maria Cecilia Giron <sup>6</sup>, Marco Silano <sup>7</sup>, Dario Gregori <sup>\*1</sup>, and the  
9 #PRESTOinsieme Study Group<sup>1</sup>  
10  
11

12  
13  
14 <sup>1</sup> Unit of Biostatistics, Epidemiology and Public Health, Department of Cardiac, Thoracic, Vascular  
15 Sciences, and Public Health, University of Padova, Padova, Italy  
16

17  
18  
19 <sup>2</sup> Department of Medical Sciences, University of Ferrara, Ferrara, Italy  
20

21  
22 <sup>3</sup> Psychotherapy Unit, Prochild Onlus, Trieste, Italy  
23

24  
25 <sup>4</sup> Zeta Research Ltd., Trieste, Italy  
26

27  
28 <sup>5</sup> Department of Clinical and Biological Sciences, University of Turin, Turin, Italy  
29

30  
31 <sup>6</sup> Department of Pharmaceutical and Pharmacological Sciences, University of Padova, Padova, Italy  
32

33  
34 <sup>7</sup> Unit of Human Nutrition and Health, Department of Food Safety, Nutrition and Veterinary Public  
35 Health, Italian National Institute of Health, Rome, Italy  
36

37  
38 <sup>8</sup> Prochild Onlus, Trieste, Italy  
39

40  
41  
42 **Corresponding author:**  
43

44  
45 Prof. Dario Gregori, MA, Ph.D., FACN, FTOS  
46

47  
48 Unit of Biostatistics, Epidemiology and Public Health,  
49  
50

51  
52  
53  
54 

---

  
55 \*These authors should be considered equally first-authors

56 <sup>1</sup> #PRESTOinsieme Study Group: Elisabetta Maresio (Prochild Onlus), Marco Silano (Italian National Institute of Health), Dario Gregori (University  
57 of Padova), Giulia Lorenzoni (University of Padova), Nicolas Destro (University of Padova), Danila Azzolina (University of Piemonte Orientale),  
58 Corrado Lanera (University of Padova), Paola Berchiolla (University of Turin), Silvia Gallipoli (Zeta Research), Solidea Baldas (Prochild Onlus),  
59 Federica Zobec (Zeta Research), Marco Ghidina (Zeta Research)  
60

1  
2  
3  
4  
5  
6  
7  
8  
9  
10  
11  
12  
13  
14  
15  
16  
17  
18  
19  
20  
21  
22  
23  
24  
25  
26  
27  
28  
29  
30  
31  
32  
33  
34  
35  
36  
37  
38  
39  
40  
41  
42  
43  
44  
45  
46  
47  
48  
49  
50  
51  
52  
53  
54  
55  
56  
57  
58  
59  
60

Department of Cardiac, Thoracic, Vascular Sciences and Public Health,

University of Padova,

Via Loredan, 18

35131 Padova, Italy

Phone: +393473518231

Email: [dario.gregori@unipd.it](mailto:dario.gregori@unipd.it)

**Word count:** 2641

For peer review only



## Abstract

**Objectives.** The present work aims to present the results of the “*PRESTOinsieme*” (which is “*we'll be together soon*” in English). The web-based survey ([www.prestoinsieme.com](http://www.prestoinsieme.com)) describes changes in lifestyle habits and symptoms of psychological discomfort in the Italian population during the COVID-19 lockdown.

**Design:** Cross-sectional online survey disseminated by messaging apps (i.e., WhatsApp and Telegram) and social networks (i.e., Instagram, Facebook, and LinkedIn).

**Setting:** Italy

**Participants:** Italian population older than 16 years of age

**Exposure:** COVID-19 lockdown

**Main Outcomes and Measures:** Survey respondents filled out a set of validated questionnaires aimed at assessing lifestyle habits and psychological health, i.e., the General Health Questionnaire (GHQ-12) to screen for psychological distress, the Impact of Event Scale-Revised (IES-R) to screen for posttraumatic stress, and the Center for Epidemiologic Studies Depression Scale (CES-D).

**Results:** Survey respondents totaled 5008. Moderate or severe psychological distress was reported in 25.5% and 22% of survey respondents, respectively. Lower age, female gender, being unemployed (OR 1.57, 95% C.I. 1.217-2.024) or being a student (OR 1.726, 95% C.I. 1.306-2.28) were predictors of more severe depressive symptoms.

**Conclusions.** The present study is one of the largest population-based surveys conducted in Italy during the first COVID-19 lockdown, providing valuable data about the Italian population's psychological health. Further studies should be conducted to understand whether psychological distress persists after the end of the lockdown.

**Keywords.** Italy; COVID-19; Lockdown; Dietary habits; Psychological distress

1  
2  
3  
4  
5  
6  
7  
8  
9  
10  
11  
12  
13  
14  
15  
16  
17  
18  
19  
20  
21  
22  
23  
24  
25  
26  
27  
28  
29  
30  
31  
32  
33  
34  
35  
36  
37  
38  
39  
40  
41  
42  
43  
44  
45  
46  
47  
48  
49  
50  
51  
52  
53  
54  
55  
56  
57  
58  
59  
60

### **Strengths and limitations of this study**

- The study is a web-based survey consisting of a set of validated questionnaires to assess the Italian population's psychological wellbeing and lifestyle habits during the COVID-19 lockdown.
- The survey involved 5008 participants over age 16, and it represents one of the largest surveys conducted during the first COVID-19 lockdown in Italy, the European country most severely affected by the first wave of the COVID-19 outbreak.
- The survey identifies predictors of psychological distress during the lockdown, helping identify individuals most vulnerable to the psychological effects of lockdown.
- Further studies should be conducted to understand the long-term consequences of the COVID-19 lockdown affecting psychological health and lifestyle habits.

peer review only

## Introduction

Containment measures (e.g., social distancing and a national lockdown) are crucial public health strategies in the fight against COVID-19 [1]. Even though such actions are essential to contain the COVID-19 pandemic, it is worth noting that they might adversely affect physical [2] and psychological [3] health and seem to be associated with an increased risk of domestic accidents [4]. Mental health changes during the lockdown have been detected by studies conducted in the U.S. and Italy, showing an increased prevalence/severity of anxiety and depressive symptoms together with an impairment of psychological functions involving memory and attention [5–7]. Furthermore, changes in lifestyle habits in response to COVID-19 and the lockdown have been reported. Italian studies have found a decrease in physical activity frequency, an impairment of sleep habits, and unhealthy eating habits [8,9]. It appears to be of extreme importance to take appropriate public health actions to mitigate the adverse effects of lockdowns [10] and to identify groups more vulnerable to the potential side effects of lockdowns to develop public health actions explicitly meant for these vulnerable populations [10].

Italy is the first European country where the COVID-19 outbreak occurred [11], causing an excess of mortality with severe overloads for the healthcare system [12]. The first containment measures were introduced on the 23<sup>rd</sup> February 2020 in the two Italian regions where the coronavirus first spread (Veneto and Lombardia) [13]. However, over a short time, the disease also spread to other Italian regions, so the Italian government introduced new containment measures at the national level on the 11<sup>th</sup> March 2020. Finally, on the 22<sup>nd</sup> March 2020, a nationwide full lockdown was implemented. Data on the Italian population during the lockdown show impaired emotional wellbeing and unhealthy lifestyle changes [14].

The present work aims to present the results of the "*PRESTOinsieme*" (imPact of quaRantine mEasures againST cOvid19, which is known as "we will be together soon" in English) project, a web-based survey conducted in Italy. The study aims to describe changes in lifestyle habits and the prevalence of psychological discomfort symptoms in the Italian population during the COVID-19 lockdown. The reason for analyzing and presenting data on both psychological wellbeing and lifestyle habits is the strict relationship documented between these two dimensions. An example of such a relationship is represented by emotional eating. Individuals experiencing anxiety and depressive symptoms are prone to emotional eating habits, i.e., eating to relieve stress instead of physical hunger, and this phenomenon was reported during the lockdown [15,16].

Several studies have been conducted so far with the aim of describing the relationship between the COVID-19 lockdown and psychological wellbeing in China, European countries, and the U.S. The value added by the present study refers to the fact that it was conducted in Italy, one of the countries

1  
2  
3 most severely affected by the pandemic, at the very beginning of the first COVID-19 lockdown, when  
4 only little information was available about the prevention and treatment of the infection and the only  
5 previous experience in the management of the outbreak was that of the city of Wuhan, in China.  
6  
7

## 8 9 **Methods**

10  
11 The *PRESTOinsieme* project is a cross-sectional web-based survey open to volunteers older than 16  
12 years of age ([www.prestoinsieme.com](http://www.prestoinsieme.com)). The project began in Italy on the 20<sup>th</sup> March 2020 to assess  
13 the effects of the national lockdown on the population's psychological health and lifestyle habits.  
14  
15

### 16 17 *Sampling strategy*

18  
19 The survey was web-based via Lime Survey [17] and disseminated by messaging apps (i.e.,  
20 WhatsApp and Telegram) and social networks (i.e., Instagram, Facebook, and LinkedIn). Survey  
21 respondents were encouraged to spread the survey to their contacts, i.e., virtual snowball sampling.  
22 Five-thousand nine hundred-thirty survey accesses were registered during the study period (from 20<sup>th</sup>  
23 March to 24<sup>th</sup> August 2020); 5008 responded, i.e., 84.5%. The response rate, calculated as the  
24 proportion of survey responses over the number of accesses to the survey website, ranged between  
25 70% and 95% during the study period (Figure S1, Panel A). The analysis included all survey  
26 responses collected until the 24<sup>th</sup> August 2020; however, 73% of survey responses were recorded  
27 until the end of the full lockdown, i.e., the 3 May 2020 (Figure S1, Panel B, and C). The regions most  
28 affected by the outbreak (i.e., Lombardia, Veneto, Piemonte, and Emilia-Romagna) provided the  
29 highest number of responses, except for Campania and Friuli Venezia Giulia (Figure S1, Panel D).  
30 Figure S2 reports the proportion of responses with missing data for each region, ranging from 36.6%  
31 to 21.1%, with an average of 29.9%.  
32  
33  
34  
35  
36  
37  
38  
39  
40  
41  
42

### 43 44 *Questionnaires*

45 The survey consisted of validated questionnaires examining participants' personal and household  
46 characteristics, psychological health, and lifestyle habits. Regarding psychological health, three  
47 validated screening instruments for psychological distress, depression, and posttraumatic stress were  
48 administered. The General Health Questionnaire (GHQ-12) was used to screen for psychological  
49 distress. The GHQ-12 was scored using the 4-point Likert method (0-1-2-3), with a threshold of 14  
50 points to indicate psychological distress [18]. The Center for Epidemiologic Studies Depression Scale  
51 (CES-D) was used to screen for depression, considering three classes of symptom severity: 0-15  
52 (no/mild depressive symptoms), 16-23 (moderate depressive symptoms), and 24-60 (severe  
53 depressive symptoms). Finally, the Impact of Event Scale-Revised (IES-R) was used to screen for  
54 posttraumatic stress. According to a recent publication in the field [19], the total score of the IES-R  
55  
56  
57  
58  
59  
60

1  
2  
3 was classified as follows: 0–23 (normal), 24–32 (mild psychological impact), 33–36 (moderate  
4 psychological impact), and  $\geq 37$  (severe psychological impact). All the instruments were validated  
5 in the Italian language and showed good psychometric properties [20–22].  
6  
7

8 Finally, lifestyle habits were assessed using a routine, validated questionnaire that is used in the Italian  
9 Food Consumption Survey (INRAN) [23], which inquiries about weekly food intake and physical  
10 activity frequency.  
11  
12

### 13 *Patient and Public Involvement*

14  
15  
16 Not applicable  
17

### 18 *Statistical analysis*

19  
20 Continuous data are reported as medians (quartiles I and III); categorical data are summarized as  
21 percentages and absolute frequencies. Wilcoxon-type tests were performed for continuous variables,  
22 and the Pearson chi-squared test or Fisher exact test was performed for categorical variables. The  
23 Pearson chi-squared test was performed when the number of observations per cell was above five;  
24 otherwise, Fisher's exact test was performed.  
25  
26  
27  
28

29 Multivariable regression models were estimated to identify predictors of psychological distress,  
30 depression, and posttraumatic stress. The categorized version of the three instruments' scores was  
31 used in the analyses. A proportional odds model was estimated for ordinal responses with more than  
32 two categories (CES-D and IES-R). A logistic regression model was estimated for the binary response  
33 variable (GHQ-12). The variables included in the model were selected via the backward elimination  
34 method and Akaike information criterion (AIC). All the models were adjusted by time from the start  
35 of the survey, which was computed as the difference between the start date of the survey and each  
36 participant response date. The time was entered in the models to account for potential confounding  
37 since the COVID-19 restrictions changed over the survey timespan, i.e., the full lockdown ended on  
38 3 May 2020, but restrictions' removal was progressive. The nonlinear effects on the study outcome  
39 (i.e., respondents' age and time effect) were included in the model using restricted cubic splines  
40 (RCS). The model estimated odds ratios (ORs) together with the 95% confidence interval (CI), and  
41 p-values were reported.  
42  
43  
44  
45  
46  
47  
48  
49  
50

51 The computations were performed using the software R 4.0.2 [24] with the rms [25] package.  
52  
53

## 54 **Results**

55  
56 There were 5008 survey respondents. The median age was 38 years, and the proportion of females  
57 was 63%. Concerning socioeconomic status, approximately half of the sample has attained a  
58 secondary education (48%), and two-thirds were actively employed (67%).  
59  
60

Table S1 (Supplementary Material) reports the analysis of respondents' sociodemographic characteristics according to the place where they lived. Participants living in areas with high numbers of COVID-19 infections were significantly older and had a higher socioeconomic status than residents of regions with low rates of COVID-19. Furthermore, most participants from high COVID-19 incidence areas were found to have university educations, and they were more likely to have a job and to live in a single-family house with a garden.

Tables 1-2-3 present respondents' characteristics according to the scores obtained at the screening tools for psychological distress, depression, and posttraumatic stress.

### *Psychological distress*

Most of the survey respondents (88.6%) suffered from psychological distress (GHQ score  $\geq 14$ ). The prevalence of psychological distress was significantly higher in females ( $p = 0.049$ ), unemployed individuals ( $p = 0.001$ ), and those who did not engage in physical activity ( $p < 0.001$ ) (Table 1). The results were confirmed by multivariable analysis (Table 4). Unemployed/retired/homemakers were found to be at significantly higher risk for psychological distress than active employees (OR 1.99, 95% CI 1.4-2.85), together with females (OR 0.77 95% CI 0.63-0.94, male vs. female).

### *Depression*

Half of the sample suffered from moderate (25.5%, 1057 participants) or severe (22%, 909 participants) depressive symptoms. In the univariable analysis (Table 2), young women (median age of 29 years) were significantly more likely to report severe depressive symptoms, while participants with no or moderate depressive symptoms had median ages of 43 and 34, respectively ( $p < 0.001$ ). In addition, participants living in multifamily houses/single-room apartments without a garden were significantly more likely to exhibit frequent moderate to severe symptoms of depression. In line with univariable analysis, lower age (OR 0.39 for interquartile range (IQR) 26-54, 95% CI 0.32-0.48), female gender, being unemployed/retired/homemaker (OR 1.57, 95% CI 1.22-2.02) or being students (OR 1.73, 95% CI 1.31-2.28) were found to be significant predictors of more severe depressive symptoms (Table 4). Additionally, participants who lived alone (OR 1.50 95% CI 1.17-1.91) and experienced a loss (OR 1.35, 95% CI 1.05-1.72) were found to be significantly more likely to suffer from depressive symptoms. Conversely, engaging in physical activity was found to be protective against the worst depressive symptoms (OR 0.64, 95% CI 0.55-0.75).

### *Posttraumatic stress*

The prevalence of moderate and severe psychological effects was 5.6% and 17.7%, respectively. For moderate/severe depressive symptoms, the impact was significantly higher in females, young

respondents, and participants living in multifamily houses (Table 3). The multivariable analysis confirmed these results (Table 4).

### *Dietary habits*

Overall, participants reported eating pasta/rice/cereals and cereal-based products a median of 7 times per week. Meat was reported more frequently than fish (median of 3 times per week vs. median of 2 times per week), while the consumption of legumes was reported to be a median of 3 times per week.

The consumption of fruits and vegetables was a median of 7 times per week each.

The analysis of the distribution of weekly food frequency according to the categorized scores of the psychological health screening tools (Tables 1-2-3) shows no statistically significant differences for GHQ scores, except for consumption of vegetables and legumes (significantly lower for participants with psychological distress,  $p = 0.003$  and  $p = 0.002$ ). Participants with moderate/severe depressive symptoms were found to consume milk-based products less frequently ( $p < 0.001$ ), fruit ( $p < 0.001$ ), dried fruit ( $p < 0.001$ ), and vegetables ( $p = 0.013$ ). Conversely, they were significantly more likely to eat foods high in fat and sugar more frequently ( $p = 0.008$ ). Similarly, participants with moderate/severe psychological impact showed a lower consumption of fruit ( $p = 0.003$ ). At the same time, they were more likely to frequently eat foods high in fat and sugar ( $p = 0.012$ ).

### **Discussion**

The present findings show a high prevalence of moderate to severe depressive symptoms during the lockdown. The analysis of predictors of psychological distress among survey respondents identified a significant association with female gender, being student or unemployed/retired/homemaker, and living in a multifamily house without a garden. Conversely, only a small proportion of participants reported moderate to severe psychological impact, and, again, young females and unemployed/retired/homemaker individuals were the most affected. For what concerns sample characteristics, they were found to be representative of national trends. Respondents from high COVID-19 incidence regions were found to have higher socio-economic status compared to those from other regions. High COVID-19 incidence regions were mainly located in Northern Italy, which is characterized by higher socio-economic level than Southern Italy, according to the official data of the Italian National Institute of Health.

A recent review in the field has shown that over a short-term period, quarantine is associated with an increased prevalence of anxiety, depression, and posttraumatic stress symptoms [26]. Such findings are confirmed by surveys conducted in the most affected countries during the COVID-19 lockdown, showing that the population presented with increased feelings of anxiety and depression [14,19].

1  
2  
3 Furthermore, emotional eating has been frequently reported [15], highlighting the strong and direct  
4 association between psychological wellbeing and lifestyle habits, which have been recently  
5 documented in college students during lockdown [27]. Surveyed individuals have reported doing less  
6 physical activity and snacking more frequently during the lockdown, with consequent weight gain  
7 [28,29]. Disturbingly, such changes have also been shown to affect children [30] with potentially  
8 detrimental long-term consequences for their health since such lifestyle changes could result in an  
9 increased risk for noncommunicable diseases over the life course.

10 A recent meta-analysis showed a 33.7% prevalence of depression [3], while in the present study, the  
11 proportion of subjects reporting moderate to severe depressive symptoms was 47.5%. However, when  
12 only severe depressive symptoms are considered, the prevalence is consistent with previous studies  
13 in the field [3]. Conversely, the prevalence of moderate to severe symptoms of posttraumatic stress  
14 was not consistent with reports in the literature [19,31], especially when only severe psychological  
15 impact was considered. In discussing such data, it is worth noting that studies in the field have  
16 employed different tools to ascertain the prevalence of depression, anxiety, and posttraumatic stress,  
17 making it difficult to compare results across studies.

18 Regarding the characterization of depressed participants, in line with the literature, female gender,  
19 low socioeconomic status [5], younger age, and being a student [32] were found to be significant  
20 predictors of depression.

### 21 *Dietary habits*

22 The study of dietary habits during the lockdown showed that participants were not compliant with  
23 the Mediterranean pyramid targets [33]. Half of the sample reported eating fruits and vegetables only  
24 twice a day, even though their recommended consumption is five times a day. In addition, participants  
25 reported eating foods high in fat and sugars (e.g., cakes) a median of 3 times a week (interquartile  
26 range 2-7), meaning that 25% of the sample ate such foods once a day, even though their consumption  
27 is recommended to be occasional. Such findings are in line with the literature, demonstrating that  
28 participants tended to snack more frequently during lockdown [28]. Fish consumption is  
29 recommended three times per week, but participants report eating fish a median of 2 times per week.  
30 We cannot rule out that lockdown might pose difficulties in the purchase of fish.

31 Interestingly, dietary patterns were found to be even worse among participants with symptoms of  
32 depression and psychological impact. They reported frequently eating foods high in fat and sugar and  
33 fruits and vegetables less frequently than participants without symptoms of depression and  
34 psychological impact. Such a finding could be interpreted as emotional eating, which has been  
35 reported during lockdown [15]. However, we can also hypothesize that participants with  
36  
37  
38  
39  
40  
41  
42  
43  
44  
45  
46  
47  
48  
49  
50  
51  
52  
53  
54  
55  
56  
57  
58  
59  
60



1  
2  
3 psychological discomfort had worse eating habits because of a worse socioeconomic status since they  
4 were more likely not to have a job and to live in a smaller house without a garden. However, we  
5 cannot clarify the issue because we did not investigate eating habits before lockdown.  
6  
7

8 The fact that no data about participants' habits before lockdown were available represents a study  
9 limitation. Since no measures were taken before the lockdown started, the present study results can  
10 only provide a characterization of survey respondents during the lockdown, without making reference  
11 to changes in psychological distress symptoms as a result of COVID-19 restrictions. Another  
12 limitation is the nonnegligible proportion of survey responses presenting with missing data and the  
13 higher proportion of responses from high-incidence COVID-19 regions compared with those from  
14 regions with a low incidence of COVID-19. Furthermore, the analysis of missing data showed that  
15 the proportion varied across regions, with the lowest proportion in regions with a high COVID-19  
16 incidence. We cannot rule out that such limits might lead to an overestimation of psychological  
17 distress prevalence; however, when only the proportion of severe depressive symptoms was  
18 considered, it was similar to that reported in the literature. More responses came from high-incidence  
19 COVID-19 regions because residents of those regions were more prone to respond to the survey.  
20 Further, that fact is related to the sampling technique employed, i.e., snowball sampling. The  
21 technique may result in a selection bias by including individuals who belong to a specific social  
22 network and excluding individuals not in that social network, since it was based on personal social  
23 networks. However, snowball sampling is a well-known and widely used sampling technique in the  
24 social sciences.  
25  
26  
27  
28  
29  
30  
31  
32  
33  
34  
35  
36

37 The present work presents several strengths. First, it is one of the largest population-based surveys  
38 conducted in Italy during the first COVID-19 lockdown, providing valuable data about the Italian  
39 population's psychological health. Furthermore, the results provide an analysis of predictors of  
40 psychological distress, depression, and posttraumatic stress, helping identify individuals most  
41 vulnerable to the psychological effects of lockdown.  
42  
43  
44  
45

46 These results have relevant implications for future research and public health. First, they provide  
47 insight into the need to understand the long-term consequences of lockdowns on psychological health  
48 and lifestyle habits, which need to be investigated further since data in the field are lacking. As an  
49 example, did depression symptoms persist after the end of the full lockdown? If yes, did they worsen?  
50 Further, for what concerns the public health perspective, if the long-term effects of lockdowns are  
51 confirmed, the present results help identify vulnerable populations that potentially benefit from  
52 follow-up programs of psychological support in the case of persistent psychological distress.  
53  
54  
55  
56  
57  
58  
59  
60

1  
2  
3  
4  
5  
6  
7  
8  
9  
10  
11  
12  
13  
14  
15  
16  
17  
18  
19  
20  
21  
22  
23  
24  
25  
26  
27  
28  
29  
30  
31  
32  
33  
34  
35  
36  
37  
38  
39  
40  
41  
42  
43  
44  
45  
46  
47  
48  
49  
50  
51  
52  
53  
54  
55  
56  
57  
58  
59  
60

**Author contributions.** DG conception of the work; DG, EM, MS design of the work; SG, SB, and MG data acquisition; DA data analysis; GL interpretation of results and draft of the work; PB and MCG substantial revision of the work.

**Funding.** This research received no specific grant from any funding agency in the public, commercial or not-for-profit sectors.

**Competing interests.** None declared

**Data sharing.** The datasets used and/or analyzed during the current study are available from the corresponding author on reasonable request.

**Patient consent.** Not applicable

**Ethical approval.** Not applicable

## References

- 1 Anderson RM, Heesterbeek H, Klinkenberg D, *et al.* How will country-based mitigation measures influence the course of the COVID-19 epidemic? *The Lancet* 2020.
- 2 Tona F, Plebani M, Gregori D, *et al.* “Stay home stay safe?” Systemic inflammation in subjects undergoing routine hematology tests during the lockdown period of COVID-19. *Clin Chem Lab Med CCLM* 2020;1.
- 3 Salari N, Hosseini-Far A, Jalali R, *et al.* Prevalence of stress, anxiety, depression among the general population during the COVID-19 pandemic: a systematic review and meta-analysis. *Glob Health* 2020;16:1–11.
- 4 Bressan S, Gallo E, Tirelli F, *et al.* Lockdown: more domestic accidents than COVID-19 in children. *Arch Dis Child* 2020.
- 5 Ettman CK, Abdalla SM, Cohen GH, *et al.* Prevalence of Depression Symptoms in US Adults Before and During the COVID-19 Pandemic. *JAMA Netw Open* 2020;3:e2019686–e2019686.
- 6 Fiorenzato E, Zabberoni S, Costa A, *et al.* Cognitive and mental health changes and their vulnerability factors related to COVID-19 lockdown in Italy. *PLoS One* 2021;16:e0246204.
- 7 Fiorillo A, Sampogna G, Giallonardo V, *et al.* Effects of the lockdown on the mental health of the general population during the COVID-19 pandemic in Italy: Results from the COMET collaborative network. *Eur Psychiatry* 2020;63.
- 8 Cellini N, Canale N, Mioni G, *et al.* Changes in sleep pattern, sense of time and digital media use during COVID-19 lockdown in Italy. *J Sleep Res* 2020;:e13074.
- 9 Canello R, Soranna D, Zambra G, *et al.* Determinants of the lifestyle changes during COVID-19 pandemic in the residents of Northern Italy. *Int J Environ Res Public Health* 2020;17:6287.
- 10 Bavli I, Sutton B, Galea S. Harms of public health interventions against covid-19 must not be ignored. *bmj* 2020;371.
- 11 Gregori D, Azzolina D, Lanera C, *et al.* A first estimation of the impact of public health actions against COVID-19 in Veneto (Italy). *J Epidemiol Community Health* Published Online First: 4 May 2020. doi:10.1136/jech-2020-214209
- 12 Magnani C, Azzolina D, Gallo E, *et al.* How Large Was the Mortality Increase Directly and Indirectly Caused by the COVID-19 Epidemic? An Analysis on All-Causes Mortality Data in Italy. *Int J Environ Res Public Health* 2020;17:3452. doi:10.3390/ijerph17103452
- 13 COVID19ita Working Group, Lorenzoni G, Lanera C, *et al.* Is a more aggressive COVID-19 case detection approach mitigating the burden on ICUs? Some reflections from Italy. *Crit Care* 2020;24:175. doi:10.1186/s13054-020-02881-y
- 14 Di Renzo L, Gualtieri P, Cinelli G, *et al.* Psychological Aspects and Eating Habits during COVID-19 Home Confinement: Results of EHLC-COVID-19 Italian Online Survey. *Nutrients* 2020;12:2152.
- 15 Cherikh F, Frey S, Bel C, *et al.* Behavioral food addiction during lockdown: time for awareness, time to prepare the aftermath. *Obes Surg* 2020;:1.

- 1  
2  
3 16 Cecchetto C, Aiello M, Gentili C, *et al.* Increased emotional eating during COVID-19  
4 associated with lockdown, psychological and social distress. *Appetite* 2021;**160**:105122.  
5  
6  
7 17 Schmitz C. LimeSurvey: An open source survey tool. *LimeSurvey Proj Hambg Ger URL*  
8 *Httpwww Limesurvey Org* 2012.  
9  
10 18 Giorgi G, Perez JML, D'Antonio AC, *et al.* The general health questionnaire (GHQ-12) in a  
11 sample of italian workers: mental health at individual and organizational level. *World J Med Sci*  
12 2014;**11**:47–56.  
13  
14 19 Wang C, Pan R, Wan X, *et al.* Immediate psychological responses and associated factors during  
15 the initial stage of the 2019 coronavirus disease (COVID-19) epidemic among the general  
16 population in china. *Int J Environ Res Public Health* 2020;**17**:1729.  
17  
18 20 Craparo G, Faraci P, Rotondo G, *et al.* The Impact of Event Scale–Revised: psychometric  
19 properties of the Italian version in a sample of flood victims. *Neuropsychiatr Dis Treat*  
20 2013;**9**:1427.  
21  
22 21 Fava GA. Assessing depressive symptoms across cultures: Italian validation of the CES-D  
23 self-rating scale. *J Clin Psychol* 1983;**39**:249–51.  
24  
25 22 Piccinelli M, Bisoffi G, Bon MG, *et al.* Validity and test-retest reliability of the Italian version  
26 of the 12-item General Health Questionnaire in general practice: a comparison between three  
27 scoring methods. *Compr Psychiatry* 1993;**34**:198–205.  
28  
29 23 Sette S, Le Donne C, Piccinelli R, *et al.* The third National Food Consumption Survey, INRAN-  
30 SCAI 2005–06: major dietary sources of nutrients in Italy. *Int J Food Sci Nutr* 2013;**64**:1014–  
31 21.  
32  
33 24 R Core Team (2019). *R: A language and environment for statistical computing*. R Foundation  
34 for Statistical Computing, Vienna, Austria. <https://www.R-project.org>  
35  
36 25 Harrell FEJ. rms: Regression Modeling Strategies. R package version 4.1-3. Published Online  
37 First: 2014.<http://CRAN.R-project.org/package=rms>  
38  
39 26 Brooks SK, Webster RK, Smith LE, *et al.* The psychological impact of quarantine and how to  
40 reduce it: rapid review of the evidence. *The Lancet* 2020.  
41  
42 27 Amatori S, Donati Zeppa S, Preti A, *et al.* Dietary habits and psychological states during  
43 COVID-19 home isolation in Italian college students: the role of physical exercise. *Nutrients*  
44 2020;**12**:3660.  
45  
46 28 Sidor A, Rzymiski P. Dietary Choices and Habits during COVID-19 Lockdown: Experience  
47 from Poland. *Nutrients* 2020;**12**:1657.  
48  
49 29 Scarmozzino F, Visioli F. Covid-19 and the Subsequent Lockdown Modified Dietary Habits of  
50 Almost Half the Population in an Italian Sample. *Foods* 2020;**9**:675.  
51  
52 30 Pietrobelli A, Pecoraro L, Ferruzzi A, *et al.* Effects of COVID-19 lockdown on lifestyle  
53 behaviors in children with obesity living in Verona, Italy: a longitudinal study. *Obesity* 2020.  
54  
55  
56  
57  
58  
59  
60

- 1  
2  
3 31 Karatzias T, Shevlin M, Murphy J, *et al.* Posttraumatic Stress Symptoms and Associated  
4 Comorbidity During the COVID-19 Pandemic in Ireland: A Population-Based Study. *J Trauma*  
5 *Stress* 2020;**33**:365–70.  
6  
7 32 Solomou I, Constantinidou F. Prevalence and predictors of anxiety and depression symptoms  
8 during the COVID-19 pandemic and compliance with precautionary measures: Age and sex  
9 matter. *Int J Environ Res Public Health* 2020;**17**:4924.  
10  
11 33 CREA, Centro di ricerca alimenti e nutrizione. *Dietary Guidelines for Healthy Eating– Revision*  
12 *2018 (Italian: Linee Guida per una sana alimentazione - Revisione 2018)*. 2018.  
13 [https://www.crea.gov.it/documents/59764/0/LINEE-GUIDA+DEFINITIVO+\(1\).pdf/3c13ff3d-](https://www.crea.gov.it/documents/59764/0/LINEE-GUIDA+DEFINITIVO+(1).pdf/3c13ff3d-74dc-88d7-0985-4678aec18537?t=1579191262173)  
14 [74dc-88d7-0985-4678aec18537?t=1579191262173](https://www.crea.gov.it/documents/59764/0/LINEE-GUIDA+DEFINITIVO+(1).pdf/3c13ff3d-74dc-88d7-0985-4678aec18537?t=1579191262173) (accessed 6 Apr 2020).  
15  
16  
17  
18  
19  
20  
21  
22  
23  
24  
25  
26  
27  
28  
29  
30  
31  
32  
33  
34  
35  
36  
37  
38  
39  
40  
41  
42  
43  
44  
45  
46  
47  
48  
49  
50  
51  
52  
53  
54  
55  
56  
57  
58  
59  
60

For peer review only

Table 1. Respondents' characteristics and habits according to GHQ score; 0-13 (no psychological distress), 14-36 (psychological distress). Data are percentages (absolute numbers) for categorical variables and I quartile/Median/III quartile for continuous variables.

|                                        | N    | 0-13<br>(N=507) | 14-36<br>(N=3931) | Combined<br>(N=4438) | P-value |
|----------------------------------------|------|-----------------|-------------------|----------------------|---------|
| Age                                    | 4438 | 26/34/48        | 26/38/53          | 26/37/53             | <0.001  |
| Gender: Female                         | 4438 | 59% (300)       | 64% (2502)        | 63% (2802)           | 0.049   |
| Male                                   |      | 41% (207)       | 36% (1429)        | 37% (1636)           |         |
| Nationality: Other                     | 4438 | 2% (8)          | 1% (53)           | 1% (61)              | 0.676   |
| Italian                                |      | 98% (499)       | 99% (3878)        | 99% (4377)           |         |
| Region: High COVID-19 incidence        | 4427 | 48% (242)       | 45% (1780)        | 46% (2022)           | 0.282   |
| Low COVID-19 incidence                 |      | 52% (263)       | 55% (2142)        | 54% (2405)           |         |
| Educational level: Secondary education | 4438 | 49% (249)       | 47% (1831)        | 47% (2080)           | 0.493   |
| University education                   |      | 50% (256)       | 53% (2089)        | 53% (2345)           |         |
| Primary education                      |      | 0% (2)          | 0% (11)           | 0% (13)              |         |
| Working status: Active employee        | 4438 | 71% (360)       | 67% (2630)        | 67% (2990)           | 0.001   |
| Unemployed/Retired/Homemaker           |      | 8% (42)         | 14% (568)         | 14% (610)            |         |
| Student                                |      | 21% (105)       | 19% (733)         | 19% (838)            |         |
| House type: Multi-family house         | 4438 | 64% (325)       | 66% (2589)        | 66% (2914)           | 0.221   |
| Single room apartment                  |      | 3% (16)         | 2% (79)           | 2% (95)              |         |
| Single-family house                    |      | 33% (166)       | 32% (1263)        | 32% (1429)           |         |
| Garden: No                             | 4438 | 39% (198)       | 42% (1658)        | 42% (1856)           | 0.180   |
| Yes                                    |      | 61% (309)       | 58% (2273)        | 58% (2582)           |         |
| Nasopharyngeal swab: No                | 2873 | 96% (278)       | 93% (2391)        | 93% (2669)           | 0.038   |
| Yes                                    |      | 4% (12)         | 7% (192)          | 7% (204)             |         |
| Recent loss: No                        | 2858 | 91% (266)       | 89% (2289)        | 89% (2555)           | 0.240   |
| Yes                                    |      | 9% (25)         | 11% (278)         | 11% (303)            |         |
| Living alone: No                       | 4438 | 88% (448)       | 88% (3469)        | 88% (3917)           | 0.939   |
| Yes                                    |      | 12% (59)        | 12% (462)         | 12% (521)            |         |
| Pet: No                                | 4438 | 54% (274)       | 54% (2112)        | 54% (2386)           | 0.893   |
| Yes                                    |      | 46% (233)       | 46% (1819)        | 46% (2052)           |         |

|    |                                              |      |           |            |            |        |
|----|----------------------------------------------|------|-----------|------------|------------|--------|
| 1  |                                              |      |           |            |            |        |
| 2  | Physical activity: No                        | 3991 | 44% (203) | 57% (2024) | 56% (2227) | <0.001 |
| 3  | Yes                                          |      | 56% (259) | 43% (1505) | 44% (1764) |        |
| 4  | <hr/>                                        |      |           |            |            |        |
| 5  | Dietary habits (weekly consumption)          |      |           |            |            |        |
| 6  | Pasta, Rice, Cereals                         | 3987 | 5/7/10    | 5/7/10     | 5/7/10     | 0.705  |
| 7  | Cereal-based products                        | 3984 | 3/7/7     | 4/7/7      | 3/7/7      | 0.214  |
| 8  | Raw meat                                     | 3985 | 2/3/4     | 2/3/4      | 2/3/4      | 0.299  |
| 9  | Cured meat                                   | 3981 | 1/2/3     | 1/2/3      | 1/2/3      | 0.050  |
| 10 | Fish                                         | 3985 | 1/2/2     | 1/2/2      | 1/2/2      | 0.864  |
| 11 | Milk and yogurt                              | 3982 | 2/7/7     | 2/7/7      | 2/7/7      | 0.971  |
| 12 | Milk-based products                          | 3984 | 2/3/5     | 2/3/5      | 2/3/5      | 0.675  |
| 13 | Fruit                                        | 3985 | 4/7/10    | 4/7/10     | 4/7/10     | 0.699  |
| 14 | Dried fruit                                  | 3981 | 0/2/5     | 0/2/5      | 0/2/5      | 0.249  |
| 15 | Vegetables                                   | 3984 | 6/7/14    | 6/7/14     | 6/7/14     | 0.003  |
| 16 | Legumes                                      | 3982 | 1/2/5     | 1/2/4      | 1/2/4      | 0.002  |
| 17 | Eggs                                         | 3984 | 1/2/3     | 1/2/2      | 1/2/2      | 0.100  |
| 18 | Foods high in fat and sugar                  | 3980 | 1/3/6     | 2/4/7      | 2/3/7      | 0.158  |
| 19 | Soft drinks                                  | 3979 | 0/0/1     | 0/0/1      | 0/0/1      | 0.478  |
| 20 | Alcoholic drinks (e.g., wine, beer, spirits) | 3981 | 0/1/3     | 0/1/4      | 0/1/4      | 0.080  |
| 21 |                                              |      |           |            |            |        |
| 22 |                                              |      |           |            |            |        |
| 23 |                                              |      |           |            |            |        |
| 24 |                                              |      |           |            |            |        |
| 25 |                                              |      |           |            |            |        |
| 26 |                                              |      |           |            |            |        |
| 27 |                                              |      |           |            |            |        |
| 28 |                                              |      |           |            |            |        |
| 29 |                                              |      |           |            |            |        |
| 30 |                                              |      |           |            |            |        |
| 31 |                                              |      |           |            |            |        |
| 32 |                                              |      |           |            |            |        |
| 33 |                                              |      |           |            |            |        |
| 34 |                                              |      |           |            |            |        |
| 35 |                                              |      |           |            |            |        |
| 36 |                                              |      |           |            |            |        |
| 37 |                                              |      |           |            |            |        |
| 38 |                                              |      |           |            |            |        |
| 39 |                                              |      |           |            |            |        |
| 40 |                                              |      |           |            |            |        |
| 41 |                                              |      |           |            |            |        |
| 42 |                                              |      |           |            |            |        |
| 43 |                                              |      |           |            |            |        |
| 44 |                                              |      |           |            |            |        |
| 45 |                                              |      |           |            |            |        |
| 46 |                                              |      |           |            |            |        |

Table 2. Respondents' characteristics and habits according to CES-D score; 0-15 (no/mild depressive symptoms), 16-23 (moderate depressive symptoms), and 24-60 (severe depressive symptoms). Data are percentages (absolute numbers) for categorical variables and I quartile/Median/III quartile for continuous variables.

|                                        | N    | 0-15<br>(N=2179) | 16-23<br>(N=1057) | 24-60<br>(N=909) | Combined<br>(N=4145) | P-value |
|----------------------------------------|------|------------------|-------------------|------------------|----------------------|---------|
| Age                                    | 4145 | 29/43/57         | 25/34/50          | 23/29/44         | 26/37/53             | <0.001  |
| Gender: Female                         | 4145 | 53% (1165)       | 70% (740)         | 80% (729)        | 64% (2634)           | <0.001  |
| Male                                   |      | 47% (1014)       | 30% (317)         | 20% (180)        | 36% (1511)           |         |
| Nationality: Other                     | 4145 | 1% (27)          | 2% (17)           | 1% (9)           | 1% (53)              | 0.464   |
| Italian                                |      | 99% (2152)       | 98% (1040)        | 99% (900)        | 99% (4092)           |         |
| Region: High COVID-19 incidence        | 4135 | 45% (976)        | 44% (464)         | 48% (431)        | 45% (1871)           | 0.258   |
| Low COVID-19 incidence                 |      | 55% (1200)       | 56% (589)         | 52% (475)        | 55% (2264)           |         |
| Educational level: Secondary education | 4145 | 45% (976)        | 44% (464)         | 52% (476)        | 46% (1916)           | <0.001  |
| University education                   |      | 55% (1196)       | 56% (593)         | 47% (431)        | 54% (2220)           |         |
| Primary education                      |      | 0% (7)           | 0% (0)            | 0% (2)           | 0% (9)               |         |
| Working status: Active employee        | 4145 | 73% (1583)       | 67% (709)         | 57% (521)        | 68% (2813)           | <0.001  |
| Unemployed/Retired/Homemaker           |      | 16% (338)        | 12% (130)         | 12% (111)        | 14% (579)            |         |
| Student                                |      | 12% (258)        | 21% (218)         | 30% (277)        | 18% (753)            |         |
| House type: Multi-family house         | 4145 | 63% (1369)       | 68% (715)         | 69% (628)        | 65% (2712)           | 0.001   |
| Single room apartment                  |      | 2% (40)          | 2% (23)           | 3% (25)          | 2% (88)              |         |
| Single-family house                    |      | 35% (770)        | 30% (319)         | 28% (256)        | 32% (1345)           |         |
| Garden: No                             | 4145 | 36% (781)        | 44% (467)         | 52% (475)        | 42% (1723)           | <0.001  |
| Yes                                    |      | 64% (1398)       | 56% (590)         | 48% (434)        | 58% (2422)           |         |
| Nasopharyngeal swab: No                | 2684 | 92% (1223)       | 92% (612)         | 95% (660)        | 93% (2495)           | 0.023   |
| Yes                                    |      | 8% (106)         | 8% (50)           | 5% (33)          | 7% (189)             |         |
| Recent loss: No                        | 2665 | 90% (1194)       | 89% (584)         | 88% (606)        | 89% (2384)           | 0.277   |
| Yes                                    |      | 10% (127)        | 11% (73)          | 12% (81)         | 11% (281)            |         |
| Living alone: No                       | 4145 | 89% (1937)       | 89% (937)         | 86% (778)        | 88% (3652)           | 0.029   |
| Yes                                    |      | 11% (242)        | 11% (120)         | 14% (131)        | 12% (493)            |         |



|                                              |      |            |           |           |            |        |
|----------------------------------------------|------|------------|-----------|-----------|------------|--------|
| Pet: No                                      | 4145 | 54% (1179) | 53% (565) | 52% (470) | 53% (2214) | 0.475  |
| Yes                                          |      | 46% (1000) | 47% (492) | 48% (439) | 47% (1931) |        |
| Physical activity: No                        | 3991 | 53% (1123) | 56% (573) | 61% (531) | 56% (2227) | 0.001  |
| Yes                                          |      | 47% (981)  | 44% (445) | 39% (338) | 44% (1764) |        |
| <i>Dietary habits (weekly consumption)</i>   |      |            |           |           |            |        |
| Pasta, Rice, Cereals                         | 3987 | 5/7/10     | 5/7/10    | 5/7/10    | 5/7/10     | 0.182  |
| Cereal-based products                        | 3984 | 3/7/7      | 4/7/7     | 4/7/7     | 3/7/7      | 0.135  |
| Raw meat                                     | 3985 | 2/3/4      | 2/3/4     | 2/3/4     | 2/3/4      | 0.418  |
| Cured meat                                   | 3981 | 1/2/3      | 1/2/3     | 1/2/3     | 1/2/3      | 0.243  |
| Fish                                         | 3985 | 1/2/2      | 1/2/2     | 1/2/2     | 1/2/2      | 0.003  |
| Milk and yogurt                              | 3982 | 1/7/7      | 2/7/7     | 2/7/7     | 2/7/7      | 0.309  |
| Milk-based products                          | 3984 | 2/3/5.25   | 2/3/5     | 1/3/5     | 2/3/5      | <0.001 |
| Fruit                                        | 3985 | 5/7/12     | 3/7/10    | 3/7/10    | 4/7/10     | <0.001 |
| Dried fruit                                  | 3981 | 0/2/5      | 0/2/5     | 0/1/4     | 0/2/5      | <0.001 |
| Vegetables                                   | 3984 | 6/7/14     | 5/7/14    | 5/7/14    | 6/7/14     | 0.013  |
| Legumes                                      | 3982 | 1/3/4      | 2/3/4     | 1/2/4     | 1/3/4      | 0.059  |
| Eggs                                         | 3984 | 1/2/2      | 1/2/2     | 1/2/2     | 1/2/2      | 0.442  |
| Foods high in fat and sugar                  | 3980 | 1/3/6      | 2/4/7     | 2/4/7     | 2/3/7      | 0.008  |
| Soft drinks                                  | 3979 | 0/0/1      | 0/0/1     | 0/0/1     | 0/0/1      | 0.002  |
| Alcoholic drinks (e.g., wine, beer, spirits) | 3981 | 0/2/5      | 0/1/4     | 0/1/3     | 0/1/4      | <0.001 |

Table 3. Respondents' characteristics and habits according to IESD-R score; 0–23 (normal), 24–32 (mild psychological impact), 33–36 (moderate psychological impact), and  $\geq 37$  (severe psychological impact). Data are percentages (absolute numbers) for categorical variables and I quartile/Median/III quartile for continuous variables.

|                                        | N    | 0-23<br>(N=2463) | 24-32<br>(N=827) | 33-36<br>(N=242) | $\geq 37$<br>(N=762) | Combined<br>(N=4294) | P-<br>value |
|----------------------------------------|------|------------------|------------------|------------------|----------------------|----------------------|-------------|
| Age                                    | 4294 | 27/40/55         | 26/37/53         | 25/33/49         | 25/33/47             | 26/37/53             | <0.001      |
| Gender: Female                         | 4294 | 52% (1279)       | 73% (600)        | 85% (205)        | 83% (633)            | 63% (2717)           | <0.001      |
| Male                                   |      | 48% (1184)       | 27% (227)        | 15% (37)         | 17% (129)            | 37% (1577)           |             |
| Nationality: Other                     | 4294 | 1% (30)          | 1% (12)          | 1% (3)           | 1% (10)              | 1% (55)              | 0.965       |
| Italian                                |      | 99% (2433)       | 99% (815)        | 99% (239)        | 99% (752)            | 99% (4239)           |             |
| Region: High COVID-19 incidence        | 4284 | 44% (1090)       | 47% (385)        | 48% (115)        | 47% (357)            | 45% (1947)           | 0.377       |
| Low COVID-19 incidence                 |      | 56% (1370)       | 53% (440)        | 52% (127)        | 53% (400)            | 55% (2337)           |             |
| Educational level: Secondary education | 4294 | 44% (1087)       | 48% (397)        | 50% (121)        | 51% (390)            | 46% (1995)           | 0.009       |
| University education                   |      | 56% (1368)       | 52% (430)        | 50% (120)        | 48% (369)            | 53% (2287)           |             |
| Primary education                      |      | 0% (8)           | 0% (0)           | 0% (1)           | 0% (3)               | 0% (12)              |             |
| Working status: Active employee        | 4294 | 70% (1720)       | 66% (543)        | 62% (151)        | 65% (494)            | 68% (2908)           | 0.001       |
| Unemployed/Retired/Homemaker           |      | 14% (349)        | 14% (115)        | 14% (34)         | 13% (100)            | 14% (598)            |             |
| Student                                |      | 16% (394)        | 20% (169)        | 24% (57)         | 22% (168)            | 18% (788)            |             |
| House type: Multi-family house         | 4294 | 64% (1586)       | 65% (538)        | 76% (183)        | 67% (512)            | 66% (2819)           | 0.003       |
| Single room apartment                  |      | 2% (49)          | 2% (19)          | 1% (2)           | 3% (25)              | 2% (95)              |             |
| Single-family house                    |      | 34% (828)        | 33% (270)        | 24% (57)         | 30% (225)            | 32% (1380)           |             |
| Garden: No                             | 4294 | 38% (935)        | 43% (355)        | 52% (126)        | 49% (375)            | 42% (1791)           | <0.001      |
| Yes                                    |      | 62% (1528)       | 57% (472)        | 48% (116)        | 51% (387)            | 58% (2503)           |             |
| Nasopharyngeal swab: No                | 2774 | 93% (1482)       | 92% (454)        | 93% (151)        | 95% (491)            | 93% (2578)           | 0.418       |
| Yes                                    |      | 7% (120)         | 8% (37)          | 7% (11)          | 5% (28)              | 7% (196)             |             |
| Recent loss: No                        | 2759 | 91% (1458)       | 87% (423)        | 88% (139)        | 87% (452)            | 90% (2472)           | 0.004       |
| Yes                                    |      | 9% (137)         | 13% (64)         | 12% (19)         | 13% (67)             | 10% (287)            |             |
| Living alone: No                       | 4294 | 88% (2170)       | 89% (737)        | 88% (214)        | 87% (663)            | 88% (3784)           | 0.635       |
| Yes                                    |      | 12% (293)        | 11% (90)         | 12% (28)         | 13% (99)             | 12% (510)            |             |

|    |                                              |      |            |           |           |           |            |        |
|----|----------------------------------------------|------|------------|-----------|-----------|-----------|------------|--------|
| 1  |                                              |      |            |           |           |           |            |        |
| 2  | Pet: No                                      | 4294 | 54% (1332) | 52% (426) | 63% (152) | 52% (397) | 54% (2307) | 0.014  |
| 3  | Yes                                          |      | 46% (1131) | 48% (401) | 37% (90)  | 48% (365) | 46% (1987) |        |
| 4  | Physical activity: No                        | 3991 | 53% (1220) | 58% (443) | 59% (132) | 61% (432) | 56% (2227) | <0.001 |
| 5  | Yes                                          |      | 47% (1081) | 42% (317) | 41% (93)  | 39% (273) | 44% (1764) |        |
| 6  | <hr/>                                        |      |            |           |           |           |            |        |
| 7  | Dietary habits (weekly consumption)          |      |            |           |           |           |            |        |
| 8  | Pasta, Rice, Cereals                         | 3987 | 5/7/10     | 6/7/10    | 5/7/10    | 5/7/10    | 5/7/10     | 0.560  |
| 9  | Cereal-based products                        | 3984 | 3/7/7      | 4/7/7     | 4/7/7     | 4/7/7     | 3/7/7      | 0.018  |
| 10 | Raw meat                                     | 3985 | 2/3/4      | 2/3/4     | 2/3/4     | 2/3/4     | 2/3/4      | 0.150  |
| 11 | Cured meat                                   | 3981 | 1/2/3      | 1/2/3     | 1/2/3     | 1/2/3     | 1/2/3      | 0.404  |
| 12 | Fish                                         | 3985 | 1/2/2      | 1/2/2     | 1/1/2     | 1/2/2     | 1/2/2      | 0.443  |
| 13 | Milk and yogurt                              | 3982 | 2/7/7      | 2/6/7     | 2/7/7     | 2/6/7     | 2/7/7      | 0.398  |
| 14 | Milk-based products                          | 3984 | 2/3/5      | 2/3/5     | 1/3/5     | 2/3/5     | 2/3/5      | 0.002  |
| 15 | Fruit                                        | 3985 | 4/7/10     | 4/7/10    | 3/7/14    | 3/7/8.75  | 4/7/10     | 0.003  |
| 16 | Dried fruit                                  | 3981 | 0/2/5      | 0/2/5     | 0/1/5     | 0/2/4     | 0/2/5      | 0.061  |
| 17 | Vegetables                                   | 3984 | 6/7/14     | 6/7/14    | 6/7/14    | 5/7/14    | 6/7/14     | 0.043  |
| 18 | Legumes                                      | 3982 | 1/3/4      | 1/2/4     | 1/2/4     | 1/2/4     | 1/3/4      | 0.710  |
| 19 | Eggs                                         | 3984 | 1/2/2      | 1/2/2     | 1/2/2     | 1/2/3     | 1/2/2      | 0.836  |
| 20 | Foods high in fat and sugar                  | 3980 | 1/3/6      | 2/3/6     | 2/4/7     | 2/4/7     | 2/3/7      | 0.012  |
| 21 | Soft drinks                                  | 3979 | 0/0/1      | 0/0/1     | 0/0/1     | 0/0/2     | 0/0/1      | <0.001 |
| 22 | Alcoholic drinks (e.g., wine, beer, spirits) | 3981 | 0/2/4      | 0/1/3     | 0/1/3     | 0/1/3     | 0/1/4      | <0.001 |
| 23 | <hr/>                                        |      |            |           |           |           |            |        |
| 24 |                                              |      |            |           |           |           |            |        |
| 25 |                                              |      |            |           |           |           |            |        |
| 26 |                                              |      |            |           |           |           |            |        |
| 27 |                                              |      |            |           |           |           |            |        |
| 28 |                                              |      |            |           |           |           |            |        |
| 29 |                                              |      |            |           |           |           |            |        |
| 30 |                                              |      |            |           |           |           |            |        |
| 31 |                                              |      |            |           |           |           |            |        |
| 32 |                                              |      |            |           |           |           |            |        |
| 33 |                                              |      |            |           |           |           |            |        |
| 34 |                                              |      |            |           |           |           |            |        |
| 35 |                                              |      |            |           |           |           |            |        |
| 36 |                                              |      |            |           |           |           |            |        |
| 37 |                                              |      |            |           |           |           |            |        |
| 38 |                                              |      |            |           |           |           |            |        |
| 39 |                                              |      |            |           |           |           |            |        |
| 40 |                                              |      |            |           |           |           |            |        |
| 41 |                                              |      |            |           |           |           |            |        |
| 42 |                                              |      |            |           |           |           |            |        |
| 43 |                                              |      |            |           |           |           |            |        |
| 44 |                                              |      |            |           |           |           |            |        |
| 45 |                                              |      |            |           |           |           |            |        |
| 46 |                                              |      |            |           |           |           |            |        |

Table 4. Results of the multivariable models (proportional odds model for the ordinal responses with more than two categories, i.e., CES-D and IES-R, logistic regression model for the binary response variable, i.e., GHQ-12). For continuous variables, the effect is reported on the interquartile range (IQR), i.e., 26-54 for age and 3-20 for days from the start of the survey). Results are reported as odds ratios (logistic regression) or proportional odds (proportional odds model), 95% confidence intervals (CI), P-value

Supplementary Material

|                                                                  | OR   | Lower 0.95 | Upper 0.95 |
|------------------------------------------------------------------|------|------------|------------|
| <i>GHQ</i>                                                       |      |            |            |
| Days from the start of the survey                                | 1.19 | 0.95       | 1.49       |
| Gender: Male vs. Female                                          | 0.77 | 0.63       | 0.94       |
| Region: Low-incidence vs. High-incidence                         | 0.87 | 0.72       | 1.06       |
| Working status: Unemployed/Retired/Homemaker vs. Active employee | 1.99 | 1.4        | 2.85       |
| Working status: Student vs. Active employee                      | 1.10 | 0.85       | 1.43       |
| Physical activity: Yes vs. No                                    | 0.56 | 0.46       | 0.69       |
| <i>CES-D</i>                                                     |      |            |            |
| Days from the start of the survey                                | 1.38 | 1.00       | 1.89       |
| Age                                                              | 0.39 | 0.32       | 0.48       |
| Gender: Male vs. Female                                          | 0.46 | 0.39       | 0.55       |
| Working status: Unemployed/Retired/Homemaker vs. Active employee | 1.57 | 1.22       | 2.02       |
| Working status: Student vs. Active employee                      | 1.73 | 1.31       | 2.28       |
| Garden: No vs. Yes                                               | 1.72 | 1.46       | 2.01       |
| Recent Loss: Yes vs. No                                          | 1.35 | 1.05       | 1.72       |
| Living alone: Yes vs. No                                         | 1.50 | 1.17       | 1.91       |
| Physical activity: Yes vs. No                                    | 0.64 | 0.55       | 0.75       |
| <i>IES-R</i>                                                     |      |            |            |
| Days from the start of the survey                                | 1.03 | 0.75       | 1.42       |
| Age                                                              | 0.67 | 0.58       | 0.78       |
| Gender: Male vs. Female                                          | 0.30 | 0.25       | 0.37       |
| Educational level: Secondary vs. University                      | 1.29 | 1.10       | 1.52       |

|    |                                           |      |      |      |
|----|-------------------------------------------|------|------|------|
| 1  |                                           |      |      |      |
| 2  | Educational level: Primary vs. University | 0.48 | 0.05 | 4.55 |
| 3  | Garden: No vs. Yes                        | 1.55 | 1.33 | 1.82 |
| 4  | Recent Loss: Yes vs. No                   | 1.63 | 1.28 | 2.09 |
| 5  | Physical activity: Yes vs. No             | 0.72 | 0.61 | 0.84 |
| 6  |                                           |      |      |      |
| 7  |                                           |      |      |      |
| 8  |                                           |      |      |      |
| 9  |                                           |      |      |      |
| 10 |                                           |      |      |      |
| 11 |                                           |      |      |      |
| 12 |                                           |      |      |      |
| 13 |                                           |      |      |      |
| 14 |                                           |      |      |      |
| 15 |                                           |      |      |      |
| 16 |                                           |      |      |      |
| 17 |                                           |      |      |      |
| 18 |                                           |      |      |      |
| 19 |                                           |      |      |      |
| 20 |                                           |      |      |      |
| 21 |                                           |      |      |      |
| 22 |                                           |      |      |      |
| 23 |                                           |      |      |      |
| 24 |                                           |      |      |      |
| 25 |                                           |      |      |      |
| 26 |                                           |      |      |      |
| 27 |                                           |      |      |      |
| 28 |                                           |      |      |      |
| 29 |                                           |      |      |      |
| 30 |                                           |      |      |      |
| 31 |                                           |      |      |      |
| 32 |                                           |      |      |      |
| 33 |                                           |      |      |      |
| 34 |                                           |      |      |      |
| 35 |                                           |      |      |      |
| 36 |                                           |      |      |      |
| 37 |                                           |      |      |      |
| 38 |                                           |      |      |      |
| 39 |                                           |      |      |      |
| 40 |                                           |      |      |      |
| 41 |                                           |      |      |      |
| 42 |                                           |      |      |      |
| 43 |                                           |      |      |      |
| 44 |                                           |      |      |      |
| 45 |                                           |      |      |      |
| 46 |                                           |      |      |      |

For peer review only

Table S1. Respondents characteristics and habits according to residency; high incidence of COVID-19 regions (i.e., Piemonte, Veneto, Lombardia, Emilia-Romagna) and low incidence COVID-19 regions.

|                                            | N    | Low COVID-19 Incidence<br>(N=2301) | High COVID-19 Incidence<br>(N=2677) | Combined<br>(N=4978) | P-value |
|--------------------------------------------|------|------------------------------------|-------------------------------------|----------------------|---------|
| Age                                        | 4978 | 25/36/53                           | 27/39/55                            | 26/38/54             | <0.001  |
| Gender: Female                             | 4974 | 63% (1454)                         | 63% (1676)                          | 63% (3130)           | 0.614   |
| Male                                       |      | 37% (43)                           | 37% (1001)                          | 37% (1844)           |         |
| Nationality: Other                         | 4977 | 2% (42)                            | 1% (31)                             | 1% (73)              | 0.051   |
| Italian                                    |      | 98% (2259)                         | 99% (2645)                          | 99% (4904)           |         |
| Educational level: Secondary education     | 4973 | 51% (1175)                         | 45% (1193)                          | 48% (2368)           | <0.001  |
| University education                       |      | 48% (1113)                         | 55% (1475)                          | 52% (2588)           |         |
| Primary education                          |      | 0% (10)                            | 0% (7)                              | 0% (17)              |         |
| Working status: Active employee            | 4972 | 63% (1442)                         | 70% (1877)                          | 67% (3319)           | <0.001  |
| Unemployed/Retired/Homemaker               |      | 16% (376)                          | 13% (360)                           | 15% (736)            |         |
| Student                                    |      | 21% (481)                          | 16% (436)                           | 18% (917)            |         |
| House type: Multi-family house             | 4969 | 72% (1660)                         | 60% (1603)                          | 66% (3263)           | <0.001  |
| Single room apartment                      |      | 3% (60)                            | 2% (51)                             | 2% (111)             |         |
| Single-family house                        |      | 25% (579)                          | 38% (1016)                          | 32% (1595)           |         |
| Garden: No                                 | 4967 | 50% (1150)                         | 35% (932)                           | 42% (2082)           | <0.001  |
| Yes                                        |      | 50% (1147)                         | 65% (1738)                          | 58% (2885)           |         |
| Nasopharyngeal swab: No                    | 3221 | 97% (1371)                         | 90% (1623)                          | 93% (2994)           | <0.001  |
| Yes                                        |      | 3% (39)                            | 10% (188)                           | 7% (227)             |         |
| Recent loss: No                            | 3208 | 90% (1267)                         | 89% (1604)                          | 89% (2871)           | 0.186   |
| Yes                                        |      | 10% (136)                          | 11% (201)                           | 11% (337)            |         |
| Living alone: No                           | 4870 | 89% (1995)                         | 88% (2315)                          | 89% (4310)           | 0.196   |
| Yes                                        |      | 11% (243)                          | 12% (317)                           | 11% (560)            |         |
| Physical activity: No                      | 3981 | 55% (971)                          | 57% (1251)                          | 56% (2222)           | 0.159   |
| Yes                                        |      | 45% (808)                          | 43% (951)                           | 44% (1759)           |         |
| <i>Dietary habits (weekly consumption)</i> |      |                                    |                                     |                      |         |

|    |                                              |      |          |        |        |        |
|----|----------------------------------------------|------|----------|--------|--------|--------|
| 1  |                                              |      |          |        |        |        |
| 2  | Pasta, Rice, Cereals                         | 3977 | 5/7/10   | 5/7/10 | 5/7/10 | 0.215  |
| 3  | Cereal-based products                        | 3974 | 3/7/7    | 4/7/7  | 4/7/7  | <0.001 |
| 4  | Raw meat                                     | 3975 | 2/3/4.25 | 2/3/4  | 2/3/4  | 0.005  |
| 5  | Cured meat                                   | 3971 | 1/2/3    | 1/2/3  | 1/2/3  | <0.001 |
| 6  | Fish                                         | 3975 | 1/2/3    | 1/1/2  | 1/2/2  | <0.001 |
| 7  | Milk and yogurt                              | 3972 | 2/7/7    | 2/7/7  | 2/7/7  | 0.782  |
| 8  | Milk-based products                          | 3974 | 2/3/5    | 2/3/5  | 2/3/5  | 0.017  |
| 9  | Fruit                                        | 3975 | 4/7/10   | 4/7/12 | 4/7/10 | <0.001 |
| 10 | Dried fruit                                  | 3971 | 0/2/5    | 0/2/5  | 0/2/5  | 0.25   |
| 11 | Vegetables                                   | 3974 | 5/7/14   | 6/7/14 | 6/7/14 | <0.001 |
| 12 | Legumes                                      | 3972 | 2/3/4    | 1/2/4  | 1/3/4  | 0.005  |
| 13 | Eggs                                         | 3974 | 1/2/3    | 1/2/2  | 1/2/2  | 0.014  |
| 14 | Food high in fat and sugar                   | 3970 | 1/3/6    | 2/4/7  | 2/3/7  | 0.241  |
| 15 | Soft drinks                                  | 3969 | 0/0/1    | 0/0/1  | 0/0/1  | 0.969  |
| 16 | Alcoholic drinks (e.g., wine, beer, spirits) | 3971 | 0/1/4    | 0/1/4  | 0/1/4  | 0.001  |
| 17 |                                              |      |          |        |        |        |
| 18 |                                              |      |          |        |        |        |
| 19 |                                              |      |          |        |        |        |
| 20 |                                              |      |          |        |        |        |
| 21 |                                              |      |          |        |        |        |
| 22 |                                              |      |          |        |        |        |
| 23 |                                              |      |          |        |        |        |
| 24 |                                              |      |          |        |        |        |
| 25 |                                              |      |          |        |        |        |
| 26 |                                              |      |          |        |        |        |
| 27 |                                              |      |          |        |        |        |
| 28 |                                              |      |          |        |        |        |
| 29 |                                              |      |          |        |        |        |
| 30 |                                              |      |          |        |        |        |
| 31 |                                              |      |          |        |        |        |
| 32 |                                              |      |          |        |        |        |
| 33 |                                              |      |          |        |        |        |
| 34 |                                              |      |          |        |        |        |
| 35 |                                              |      |          |        |        |        |
| 36 |                                              |      |          |        |        |        |
| 37 |                                              |      |          |        |        |        |
| 38 |                                              |      |          |        |        |        |
| 39 |                                              |      |          |        |        |        |
| 40 |                                              |      |          |        |        |        |
| 41 |                                              |      |          |        |        |        |
| 42 |                                              |      |          |        |        |        |
| 43 |                                              |      |          |        |        |        |
| 44 |                                              |      |          |        |        |        |
| 45 |                                              |      |          |        |        |        |
| 46 |                                              |      |          |        |        |        |

Figure S1. Survey response report. Panel A reports the weekly response rate, calculated as the proportion of survey responses over the number of accesses to the survey website. The dotted line represents the overall response rate (84.5%). Panel B represents the number of responses per day. Panel C reports the number of website accesses per day. Panel D reports the number of accesses per region.

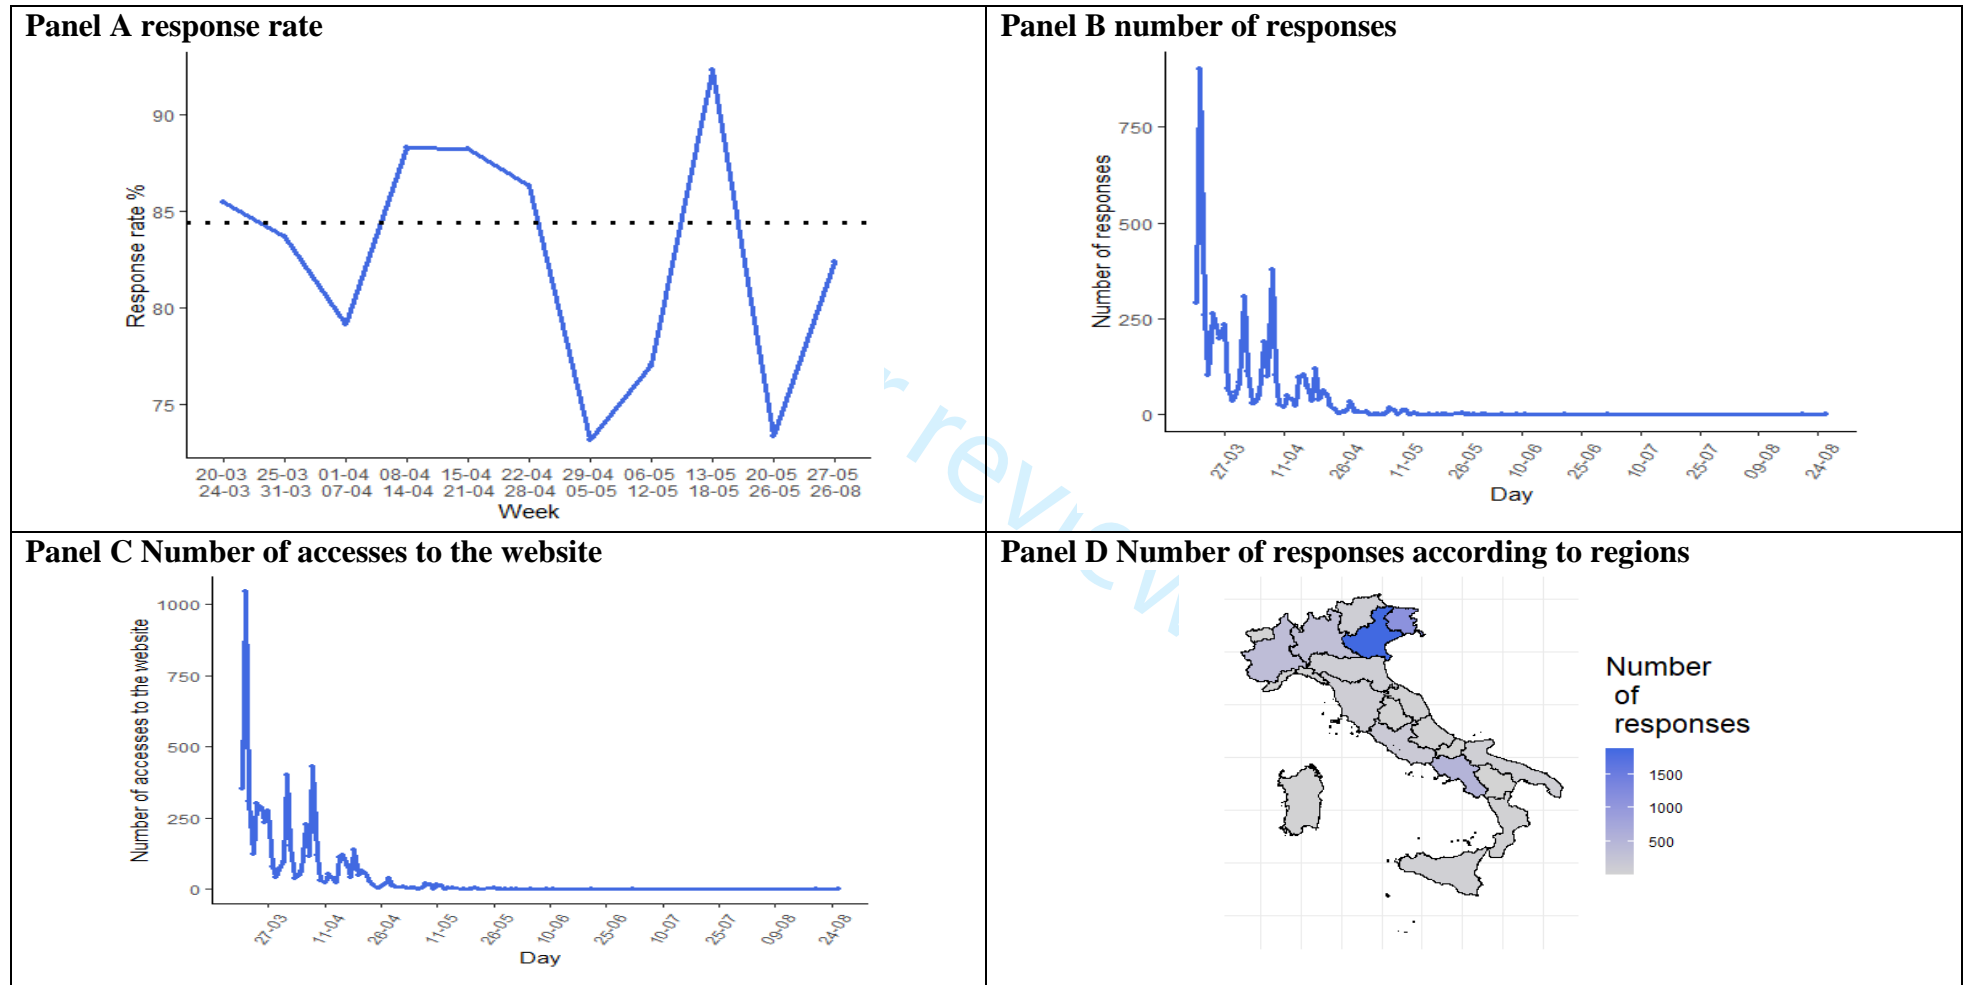



Figure S2. Missing Responses report. Percentage of missing responses per region. The dotted line represents the overall survey missing rate computed as a percentage (29.9%) of complete responses over the survey questionnaire



**STROBE 2007 (v4) Statement—Checklist of items that should be included in reports of *cross-sectional studies***

| Section/Topic                | Item # | Recommendation                                                                                                                                                                       | Reported on page # |
|------------------------------|--------|--------------------------------------------------------------------------------------------------------------------------------------------------------------------------------------|--------------------|
| <b>Title and abstract</b>    | 1      | (a) Indicate the study's design with a commonly used term in the title or the abstract                                                                                               | 1-3                |
|                              |        | (b) Provide in the abstract an informative and balanced summary of what was done and what was found                                                                                  | 3                  |
| <b>Introduction</b>          |        |                                                                                                                                                                                      |                    |
| Background/rationale         | 2      | Explain the scientific background and rationale for the investigation being reported                                                                                                 | 5                  |
| Objectives                   | 3      | State specific objectives, including any prespecified hypotheses                                                                                                                     | 5                  |
| <b>Methods</b>               |        |                                                                                                                                                                                      |                    |
| Study design                 | 4      | Present key elements of study design early in the paper                                                                                                                              | 5-6                |
| Setting                      | 5      | Describe the setting, locations, and relevant dates, including periods of recruitment, exposure, follow-up, and data collection                                                      | 6                  |
| Participants                 | 6      | (a) Give the eligibility criteria, and the sources and methods of selection of participants                                                                                          | 6                  |
| Variables                    | 7      | Clearly define all outcomes, exposures, predictors, potential confounders, and effect modifiers. Give diagnostic criteria, if applicable                                             | 6                  |
| Data sources/<br>measurement | 8*     | For each variable of interest, give sources of data and details of methods of assessment (measurement). Describe comparability of assessment methods if there is more than one group | 6                  |
| Bias                         | 9      | Describe any efforts to address potential sources of bias                                                                                                                            | 6                  |
| Study size                   | 10     | Explain how the study size was arrived at                                                                                                                                            | NA                 |
| Quantitative variables       | 11     | Explain how quantitative variables were handled in the analyses. If applicable, describe which groupings were chosen and why                                                         | 7                  |
| Statistical methods          | 12     | (a) Describe all statistical methods, including those used to control for confounding                                                                                                | 7                  |
|                              |        | (b) Describe any methods used to examine subgroups and interactions                                                                                                                  | NA                 |
|                              |        | (c) Explain how missing data were addressed                                                                                                                                          | 7                  |
|                              |        | (d) If applicable, describe analytical methods taking account of sampling strategy                                                                                                   | 7                  |
|                              |        | (e) Describe any sensitivity analyses                                                                                                                                                | NA                 |
| <b>Results</b>               |        |                                                                                                                                                                                      |                    |

|                          |     |                                                                                                                                                                                                              |         |
|--------------------------|-----|--------------------------------------------------------------------------------------------------------------------------------------------------------------------------------------------------------------|---------|
| Participants             | 13* | (a) Report numbers of individuals at each stage of study—eg numbers potentially eligible, examined for eligibility, confirmed eligible, included in the study, completing follow-up, and analysed            | 7       |
|                          |     | (b) Give reasons for non-participation at each stage                                                                                                                                                         | NA      |
|                          |     | (c) Consider use of a flow diagram                                                                                                                                                                           | NA      |
| Descriptive data         | 14* | (a) Give characteristics of study participants (eg demographic, clinical, social) and information on exposures and potential confounders                                                                     | 7       |
|                          |     | (b) Indicate number of participants with missing data for each variable of interest                                                                                                                          | Table 1 |
| Outcome data             | 15* | Report numbers of outcome events or summary measures                                                                                                                                                         | 7       |
| Main results             | 16  | (a) Give unadjusted estimates and, if applicable, confounder-adjusted estimates and their precision (eg, 95% confidence interval). Make clear which confounders were adjusted for and why they were included | 7-8     |
|                          |     | (b) Report category boundaries when continuous variables were categorized                                                                                                                                    | 7-8     |
|                          |     | (c) If relevant, consider translating estimates of relative risk into absolute risk for a meaningful time period                                                                                             | NA      |
| Other analyses           | 17  | Report other analyses done—eg analyses of subgroups and interactions, and sensitivity analyses                                                                                                               | NA      |
| <b>Discussion</b>        |     |                                                                                                                                                                                                              |         |
| Key results              | 18  | Summarise key results with reference to study objectives                                                                                                                                                     | 9       |
| Limitations              | 19  | Discuss limitations of the study, taking into account sources of potential bias or imprecision. Discuss both direction and magnitude of any potential bias                                                   | 10      |
| Interpretation           | 20  | Give a cautious overall interpretation of results considering objectives, limitations, multiplicity of analyses, results from similar studies, and other relevant evidence                                   | 10      |
| Generalisability         | 21  | Discuss the generalisability (external validity) of the study results                                                                                                                                        | 10      |
| <b>Other information</b> |     |                                                                                                                                                                                                              |         |
| Funding                  | 22  | Give the source of funding and the role of the funders for the present study and, if applicable, for the original study on which the present article is based                                                | 11      |

\*Give information separately for cases and controls in case-control studies and, if applicable, for exposed and unexposed groups in cohort and cross-sectional studies.

**Note:** An Explanation and Elaboration article discusses each checklist item and gives methodological background and published examples of transparent reporting. The STROBE checklist is best used in conjunction with this article (freely available on the Web sites of PLoS Medicine at <http://www.plosmedicine.org/>, Annals of Internal Medicine at <http://www.annals.org/>, and Epidemiology at <http://www.epidem.com/>). Information on the STROBE Initiative is available at [www.strobe-statement.org](http://www.strobe-statement.org).

# BMJ Open

## Impact of the COVID-19 lockdown on psychological health and nutritional habits in Italy: results from the #PRESTOinsieme study

|                                 |                                                                                                                                                                                                                                                                                                                                                                                                                                                                                                                                                   |
|---------------------------------|---------------------------------------------------------------------------------------------------------------------------------------------------------------------------------------------------------------------------------------------------------------------------------------------------------------------------------------------------------------------------------------------------------------------------------------------------------------------------------------------------------------------------------------------------|
| Journal:                        | <i>BMJ Open</i>                                                                                                                                                                                                                                                                                                                                                                                                                                                                                                                                   |
| Manuscript ID                   | bmjopen-2021-048916.R3                                                                                                                                                                                                                                                                                                                                                                                                                                                                                                                            |
| Article Type:                   | Original research                                                                                                                                                                                                                                                                                                                                                                                                                                                                                                                                 |
| Date Submitted by the Author:   | 03-Mar-2022                                                                                                                                                                                                                                                                                                                                                                                                                                                                                                                                       |
| Complete List of Authors:       | Lorenzoni, Giulia; University of Padova<br>Azzolina, Danila; University of Padova; University of Ferrara<br>Maresio, Elisabetta; Psychotherapy Unit Prochild Onlus<br>Gallipoli, Silvia; Zeta Research Ltd<br>Ghidina, Marco; Zeta Research Ltd<br>Baldas, Solidea; Prochild Onlus<br>Berchiolla, Paola; Università degli Studi di Torino<br>Giron, Maria Cecilia; University of Padova<br>Silano, Marco; Istituto Superiore di Sanità, Unit of Human Nutrition and Health<br>Gregori, Dario; University of Padova School of Medicine and Surgery |
| <b>Primary Subject Heading</b>: | Public health                                                                                                                                                                                                                                                                                                                                                                                                                                                                                                                                     |
| Secondary Subject Heading:      | Epidemiology                                                                                                                                                                                                                                                                                                                                                                                                                                                                                                                                      |
| Keywords:                       | COVID-19, NUTRITION & DIETETICS, Anxiety disorders < PSYCHIATRY, Public health < INFECTIOUS DISEASES                                                                                                                                                                                                                                                                                                                                                                                                                                              |
|                                 |                                                                                                                                                                                                                                                                                                                                                                                                                                                                                                                                                   |

SCHOLARONE™  
Manuscripts



I, the Submitting Author has the right to grant and does grant on behalf of all authors of the Work (as defined in the below author licence), an exclusive licence and/or a non-exclusive licence for contributions from authors who are: i) UK Crown employees; ii) where BMJ has agreed a CC-BY licence shall apply, and/or iii) in accordance with the terms applicable for US Federal Government officers or employees acting as part of their official duties; on a worldwide, perpetual, irrevocable, royalty-free basis to BMJ Publishing Group Ltd ("BMJ") its licensees and where the relevant Journal is co-owned by BMJ to the co-owners of the Journal, to publish the Work in this journal and any other BMJ products and to exploit all rights, as set out in our [licence](#).

The Submitting Author accepts and understands that any supply made under these terms is made by BMJ to the Submitting Author unless you are acting as an employee on behalf of your employer or a postgraduate student of an affiliated institution which is paying any applicable article publishing charge ("APC") for Open Access articles. Where the Submitting Author wishes to make the Work available on an Open Access basis (and intends to pay the relevant APC), the terms of reuse of such Open Access shall be governed by a Creative Commons licence – details of these licences and which [Creative Commons](#) licence will apply to this Work are set out in our licence referred to above.

Other than as permitted in any relevant BMJ Author's Self Archiving Policies, I confirm this Work has not been accepted for publication elsewhere, is not being considered for publication elsewhere and does not duplicate material already published. I confirm all authors consent to publication of this Work and authorise the granting of this licence.

1  
2  
3 **Impact of the COVID-19 lockdown on psychological health and nutritional habits in Italy:**  
4 **results from the #PRESTOinsieme study**  
5  
6

7 Giulia Lorenzoni <sup>1\*</sup>, Danila Azzolina <sup>1,2\*</sup>, Elisabetta Maresio<sup>3\*</sup>, Silvia Gallipoli <sup>4</sup>, Marco Ghidina <sup>4</sup>,  
8 Solidea Baldas <sup>8</sup>, Paola Berchiolla <sup>5</sup>, Maria Cecilia Giron <sup>6</sup>, Marco Silano <sup>7</sup>, Dario Gregori <sup>\*1</sup>, and the  
9 #PRESTOinsieme Study Group<sup>1</sup>  
10  
11  
12

13  
14 <sup>1</sup> Unit of Biostatistics, Epidemiology and Public Health, Department of Cardiac, Thoracic, Vascular  
15 Sciences, and Public Health, University of Padova, Padova, Italy  
16

17  
18  
19 <sup>2</sup> Department of Medical Sciences, University of Ferrara, Ferrara, Italy  
20

21  
22 <sup>3</sup> Psychotherapy Unit, Prochild Onlus, Trieste, Italy  
23

24  
25 <sup>4</sup> Zeta Research Ltd., Trieste, Italy  
26

27  
28 <sup>5</sup> Department of Clinical and Biological Sciences, University of Turin, Turin, Italy  
29

30  
31 <sup>6</sup> Department of Pharmaceutical and Pharmacological Sciences, University of Padova, Padova, Italy  
32

33  
34 <sup>7</sup> Unit of Human Nutrition and Health, Department of Food Safety, Nutrition and Veterinary Public  
35 Health, Italian National Institute of Health, Rome, Italy  
36

37  
38 <sup>8</sup> Prochild Onlus, Trieste, Italy  
39

40  
41  
42 **Corresponding author:**  
43

44  
45 Prof. Dario Gregori, MA, Ph.D., FACN, FTOS  
46

47  
48 Unit of Biostatistics, Epidemiology and Public Health,  
49  
50  
51

52  
53  
54 

---

  
55 \*These authors should be considered equally first-authors

56 <sup>1</sup> #PRESTOinsieme Study Group: Elisabetta Maresio (Prochild Onlus), Marco Silano (Italian National Institute of Health), Dario Gregori (University  
57 of Padova), Giulia Lorenzoni (University of Padova), Nicolas Destro (University of Padova), Danila Azzolina (University of Piemonte Orientale),  
58 Corrado Lanera (University of Padova), Paola Berchiolla (University of Turin), Silvia Gallipoli (Zeta Research), Solidea Baldas (Prochild Onlus),  
59 Federica Zobec (Zeta Research), Marco Ghidina (Zeta Research)  
60

1  
2  
3  
4  
5  
6  
7  
8  
9  
10  
11  
12  
13  
14  
15  
16  
17  
18  
19  
20  
21  
22  
23  
24  
25  
26  
27  
28  
29  
30  
31  
32  
33  
34  
35  
36  
37  
38  
39  
40  
41  
42  
43  
44  
45  
46  
47  
48  
49  
50  
51  
52  
53  
54  
55  
56  
57  
58  
59  
60

Department of Cardiac, Thoracic, Vascular Sciences and Public Health,

University of Padova,

Via Loredan, 18

35131 Padova, Italy

Phone: +393473518231

Email: [dario.gregori@unipd.it](mailto:dario.gregori@unipd.it)

**Word count:** 2641

For peer review only

## Abstract

**Objectives.** The present work aims to present the results of the “*PRESTOinsieme*” (which is “*we'll be together soon*” in English). The web-based survey ([www.prestoinsieme.com](http://www.prestoinsieme.com)) describes changes in lifestyle habits and symptoms of psychological discomfort in the Italian population during the COVID-19 lockdown.

**Design:** Cross-sectional online survey disseminated by messaging apps (i.e., WhatsApp and Telegram) and social networks (i.e., Instagram, Facebook, and LinkedIn).

**Setting:** Italy

**Participants:** Italian population older than 16 years of age

**Exposure:** COVID-19 lockdown

**Main Outcomes and Measures:** Survey respondents filled out a set of validated questionnaires aimed at assessing lifestyle habits and psychological health, i.e., the General Health Questionnaire (GHQ-12) to screen for psychological distress, the Impact of Event Scale-Revised (IES-R) to screen for posttraumatic stress, and the Center for Epidemiologic Studies Depression Scale (CES-D).

**Results:** Survey respondents totaled 5008. Moderate or severe psychological distress was reported in 25.5% and 22% of survey respondents, respectively. Lower age, female gender, being unemployed (OR 1.57, 95% C.I. 1.217-2.024) or being a student (OR 1.726, 95% C.I. 1.306-2.28) were predictors of more severe depressive symptoms.

**Conclusions.** The present study is one of the largest population-based surveys conducted in Italy during the first COVID-19 lockdown, providing valuable data about the Italian population's psychological health. Further studies should be conducted to understand whether psychological distress persists after the end of the lockdown.

**Keywords.** Italy; COVID-19; Lockdown; Dietary habits; Psychological distress



1  
2  
3  
4  
5  
6  
7  
8  
9  
10  
11  
12  
13  
14  
15  
16  
17  
18  
19  
20  
21  
22  
23  
24  
25  
26  
27  
28  
29  
30  
31  
32  
33  
34  
35  
36  
37  
38  
39  
40  
41  
42  
43  
44  
45  
46  
47  
48  
49  
50  
51  
52  
53  
54  
55  
56  
57  
58  
59  
60

### **Strengths and limitations of this study**

- The study is a web-based survey consisting of a set of validated questionnaires to assess the Italian population's psychological wellbeing and lifestyle habits during the COVID-19 lockdown.
- The survey involved 5008 participants over age 16, and it represents one of the largest surveys conducted during the first COVID-19 lockdown in Italy, the European country most severely affected by the first wave of the COVID-19 outbreak.
- The survey identifies predictors of psychological distress during the lockdown, helping identify individuals most vulnerable to the psychological effects of lockdown.
- Further studies should be conducted to understand the long-term consequences of the COVID-19 lockdown affecting psychological health and lifestyle habits.

peer review only

## Introduction

Containment measures (e.g., social distancing and a national lockdown) are crucial public health strategies in the fight against COVID-19 [1]. Even though such actions are essential to contain the COVID-19 pandemic, it is worth noting that they might adversely affect physical [2] and psychological [3] health and seem to be associated with an increased risk of domestic accidents [4]. Mental health changes during the lockdown have been detected by studies conducted in the U.S. and Italy, showing an increased prevalence/severity of anxiety and depressive symptoms together with an impairment of psychological functions involving memory and attention [5–7]. Furthermore, changes in lifestyle habits in response to COVID-19 and the lockdown have been reported. Italian studies have found a decrease in physical activity frequency, an impairment of sleep habits, and unhealthy eating habits [8,9]. It appears to be of extreme importance to take appropriate public health actions to mitigate the adverse effects of lockdowns [10] and to identify groups more vulnerable to the potential side effects of lockdowns to develop public health actions explicitly meant for these vulnerable populations [10].

Italy is the first European country where the COVID-19 outbreak occurred [11], causing an excess of mortality with severe overloads for the healthcare system [12]. The first containment measures were introduced on the 23<sup>rd</sup> February 2020 in the two Italian regions where the coronavirus first spread (Veneto and Lombardia) [13]. However, over a short time, the disease also spread to other Italian regions, so the Italian government introduced new containment measures at the national level on the 11<sup>th</sup> March 2020. Finally, on the 22<sup>nd</sup> March 2020, a nationwide full lockdown was implemented. Data on the Italian population during the lockdown show impaired emotional wellbeing and unhealthy lifestyle changes [14].

The present work aims to present the results of the "*PRESTOinsieme*" (imPact of quaRantine mEasures againST cOvid19, which is known as "we will be together soon" in English) project, a web-based survey conducted in Italy. The study aims to describe changes in lifestyle habits and the prevalence of psychological discomfort symptoms in the Italian population during the COVID-19 lockdown. The reason for analyzing and presenting data on both psychological wellbeing and lifestyle habits is the strict relationship documented between these two dimensions. An example of such a relationship is represented by emotional eating. Individuals experiencing anxiety and depressive symptoms are prone to emotional eating habits, i.e., eating to relieve stress instead of physical hunger, and this phenomenon was reported during the lockdown [15,16].

Several studies have been conducted so far with the aim of describing the relationship between the COVID-19 lockdown and psychological wellbeing in China, European countries, and the U.S. The value added by the present study refers to the fact that it was conducted in Italy, one of the countries

1  
2  
3 most severely affected by the pandemic, at the very beginning of the first COVID-19 lockdown, when  
4 only little information was available about the prevention and treatment of the infection and the only  
5 previous experience in the management of the outbreak was that of the city of Wuhan, in China.  
6  
7

## 8 9 **Methods**

10  
11 The *PRESTOinsieme* project is a cross-sectional web-based survey open to volunteers older than 16  
12 years of age ([www.prestoinsieme.com](http://www.prestoinsieme.com)). The project began in Italy on the 20<sup>th</sup> March 2020 to assess  
13 the effects of the national lockdown on the population's psychological health and lifestyle habits.  
14  
15

### 16 17 *Sampling strategy*

18  
19 The survey was web-based via Lime Survey [17] and disseminated by messaging apps (i.e.,  
20 WhatsApp and Telegram) and social networks (i.e., Instagram, Facebook, and LinkedIn). Survey  
21 respondents were encouraged to spread the survey to their contacts, i.e., virtual snowball sampling.  
22 Five-thousand nine hundred-thirty survey accesses were registered during the study period (from 20<sup>th</sup>  
23 March to 24<sup>th</sup> August 2020); 5008 responded, i.e., 84.5%. The response rate, calculated as the  
24 proportion of survey responses over the number of accesses to the survey website, ranged between  
25 70% and 95% during the study period (Figure S1, Panel A). The analysis included all survey  
26 responses collected until the 24<sup>th</sup> August 2020; however, 73% of survey responses were recorded  
27 until the end of the full lockdown, i.e., the 3 May 2020 (Figure S1, Panel B, and C). The regions most  
28 affected by the outbreak (i.e., Lombardia, Veneto, Piemonte, and Emilia-Romagna) provided the  
29 highest number of responses, except for Campania and Friuli Venezia Giulia (Figure S1, Panel D).  
30 Figure S2 reports the proportion of responses with missing data for each region, ranging from 36.6%  
31 to 21.1%, with an average of 29.9%.  
32  
33  
34  
35  
36  
37  
38  
39  
40  
41  
42

### 43 44 *Questionnaires*

45 The survey consisted of validated questionnaires examining participants' personal and household  
46 characteristics, psychological health, and lifestyle habits. Regarding psychological health, three  
47 validated screening instruments for psychological distress, depression, and posttraumatic stress were  
48 administered. The General Health Questionnaire (GHQ-12) was used to screen for psychological  
49 distress. The GHQ-12 was scored using the 4-point Likert method (0-1-2-3), with a threshold of 14  
50 points to indicate psychological distress [18]. The Center for Epidemiologic Studies Depression Scale  
51 (CES-D) was used to screen for depression, considering three classes of symptom severity: 0-15  
52 (no/mild depressive symptoms), 16-23 (moderate depressive symptoms), and 24-60 (severe  
53 depressive symptoms). Finally, the Impact of Event Scale-Revised (IES-R) was used to screen for  
54 posttraumatic stress. According to a recent publication in the field [19], the total score of the IES-R  
55  
56  
57  
58  
59  
60

1  
2  
3 was classified as follows: 0–23 (normal), 24–32 (mild psychological impact), 33–36 (moderate  
4 psychological impact), and  $\geq 37$  (severe psychological impact). All the instruments were validated  
5 in the Italian language and showed good psychometric properties [20–22].  
6  
7

8 Finally, lifestyle habits were assessed using a routine, validated questionnaire that is used in the Italian  
9 Food Consumption Survey (INRAN) [23], which inquiries about weekly food intake and physical  
10 activity frequency.  
11  
12

### 13 *Patient and Public Involvement*

14  
15  
16 Not applicable  
17

### 18 *Statistical analysis*

19  
20 Continuous data are reported as medians (quartiles I and III); categorical data are summarized as  
21 percentages and absolute frequencies. Wilcoxon-type tests were performed for continuous variables,  
22 and the Pearson chi-squared test or Fisher exact test was performed for categorical variables. The  
23 Pearson chi-squared test was performed when the number of observations per cell was above five;  
24 otherwise, Fisher's exact test was performed.  
25  
26  
27  
28

29 Multivariable regression models were estimated to identify predictors of psychological distress,  
30 depression, and posttraumatic stress. The categorized version of the three instruments' scores was  
31 used in the analyses. A proportional odds model was estimated for ordinal responses with more than  
32 two categories (CES-D and IES-R). A logistic regression model was estimated for the binary response  
33 variable (GHQ-12). The variables included in the model were selected via the backward elimination  
34 method and Akaike information criterion (AIC). All the models were adjusted by time from the start  
35 of the survey, which was computed as the difference between the start date of the survey and each  
36 participant response date. The time was entered in the models to account for potential confounding  
37 since the COVID-19 restrictions changed over the survey timespan, i.e., the full lockdown ended on  
38 3 May 2020, but restrictions' removal was progressive. The nonlinear effects on the study outcome  
39 (i.e., respondents' age and time effect) were included in the model using restricted cubic splines  
40 (RCS). The model estimated odds ratios (ORs) together with the 95% confidence interval (CI), and  
41 p-values were reported.  
42  
43  
44  
45  
46  
47  
48  
49  
50

51 The computations were performed using the software R 4.0.2 [24] with the rms [25] package.  
52  
53

## 54 **Results**

55  
56 There were 5008 survey respondents. The median age was 38 years, and the proportion of females  
57 was 63%. Concerning socioeconomic status, approximately half of the sample has attained a  
58 secondary education (48%), and two-thirds were actively employed (67%).  
59  
60

1  
2  
3 Table S1 (Supplementary Material) reports the analysis of respondents' sociodemographic  
4 characteristics according to the place where they lived. Participants living in areas with high numbers  
5 of COVID-19 infections were significantly older and had a higher socioeconomic status than residents  
6 of regions with low rates of COVID-19. Furthermore, most participants from high COVID-19  
7 incidence areas were found to have university educations, and they were more likely to have a job  
8 and to live in a single-family house with a garden.  
9

10  
11  
12  
13 Tables 1-2-3 present respondents' characteristics according to the scores obtained at the screening  
14 tools for psychological distress, depression, and posttraumatic stress.  
15

### 16 17 *Psychological distress*

18  
19  
20 Most of the survey respondents (88.6%) suffered from psychological distress (GHQ score  $\geq 14$ ). The  
21 prevalence of psychological distress was significantly higher in females ( $p = 0.049$ ), unemployed  
22 individuals ( $p = 0.001$ ), and those who did not engage in physical activity ( $p < 0.001$ ) (Table 1). The  
23 results were confirmed by multivariable analysis (Table 4). Unemployed/retired/homemakers were  
24 found to be at significantly higher risk for psychological distress than active employees (OR 1.99,  
25 95% CI 1.4-2.85), together with females (OR 0.77 95% CI 0.63-0.94, male vs. female).  
26  
27  
28  
29

### 30 31 *Depression*

32  
33 Half of the sample suffered from moderate (25.5%, 1057 participants) or severe (22%, 909  
34 participants) depressive symptoms. In the univariable analysis (Table 2), young women (median age  
35 of 29 years) were significantly more likely to report severe depressive symptoms, while participants  
36 with no or moderate depressive symptoms had median ages of 43 and 34, respectively ( $p < 0.001$ ). In  
37 addition, participants living in multifamily houses/single-room apartments without a garden were  
38 significantly more likely to exhibit frequent moderate to severe symptoms of depression. In line with  
39 univariable analysis, lower age (OR 0.39 for interquartile range (IQR) 26-54, 95% CI 0.32-0.48),  
40 female gender, being unemployed/retired/homemaker (OR 1.57, 95% CI 1.22-2.02) or being students  
41 (OR 1.73, 95% CI 1.31-2.28) were found to be significant predictors of more severe depressive  
42 symptoms (Table 4). Additionally, participants who lived alone (OR 1.50 95% CI 1.17-1.91) and  
43 experienced a loss (OR 1.35, 95% CI 1.05-1.72) were found to be significantly more likely to suffer  
44 from depressive symptoms. Conversely, engaging in physical activity was found to be protective  
45 against the worst depressive symptoms (OR 0.64, 95% CI 0.55-0.75).  
46  
47  
48  
49  
50  
51  
52  
53  
54

### 55 56 *Posttraumatic stress*

57  
58 The prevalence of moderate and severe psychological effects was 5.6% and 17.7%, respectively. For  
59 moderate/severe depressive symptoms, the impact was significantly higher in females, young  
60

respondents, and participants living in multifamily houses (Table 3). The multivariable analysis confirmed these results (Table 4).

### *Dietary habits*

Overall, participants reported eating pasta/rice/cereals and cereal-based products a median of 7 times per week. Meat was reported more frequently than fish (median of 3 times per week vs. median of 2 times per week), while the consumption of legumes was reported to be a median of 3 times per week.

The consumption of fruits and vegetables was a median of 7 times per week each.

The analysis of the distribution of weekly food frequency according to the categorized scores of the psychological health screening tools (Tables 1-2-3) shows no statistically significant differences for GHQ scores, except for consumption of vegetables and legumes (significantly lower for participants with psychological distress,  $p = 0.003$  and  $p = 0.002$ ). Participants with moderate/severe depressive symptoms were found to consume milk-based products less frequently ( $p < 0.001$ ), fruit ( $p < 0.001$ ), dried fruit ( $p < 0.001$ ), and vegetables ( $p = 0.013$ ). Conversely, they were significantly more likely to eat foods high in fat and sugar more frequently ( $p = 0.008$ ). Similarly, participants with moderate/severe psychological impact showed a lower consumption of fruit ( $p = 0.003$ ). At the same time, they were more likely to frequently eat foods high in fat and sugar ( $p = 0.012$ ).

### **Discussion**

The present findings show a high prevalence of moderate to severe depressive symptoms during the lockdown. The analysis of predictors of psychological distress among survey respondents identified a significant association with female gender, being student or unemployed/retired/homemaker, and living in a multifamily house without a garden. Conversely, only a small proportion of participants reported moderate to severe psychological impact, and, again, young females and unemployed/retired/homemaker individuals were the most affected. For what concerns sample characteristics, they were found to be representative of national trends. Respondents from high COVID-19 incidence regions were found to have higher socio-economic status compared to those from other regions. High COVID-19 incidence regions were mainly located in Northern Italy, which is characterized by higher socio-economic level than Southern Italy, according to the official data of the Italian National Institute of Health.

A recent review in the field has shown that over a short-term period, quarantine is associated with an increased prevalence of anxiety, depression, and posttraumatic stress symptoms [26]. Such findings are confirmed by surveys conducted in the most affected countries during the COVID-19 lockdown, showing that the population presented with increased feelings of anxiety and depression [14,19].

1  
2  
3 Furthermore, emotional eating has been frequently reported [15], highlighting the strong and direct  
4 association between psychological wellbeing and lifestyle habits, which have been recently  
5 documented in college students during lockdown [27]. Surveyed individuals have reported doing less  
6 physical activity and snacking more frequently during the lockdown, with consequent weight gain  
7 [28,29]. Disturbingly, such changes have also been shown to affect children [30] with potentially  
8 detrimental long-term consequences for their health since such lifestyle changes could result in an  
9 increased risk for noncommunicable diseases over the life course.

10 A recent meta-analysis showed a 33.7% prevalence of depression [3], while in the present study, the  
11 proportion of subjects reporting moderate to severe depressive symptoms was 47.5%. However, when  
12 only severe depressive symptoms are considered, the prevalence is consistent with previous studies  
13 in the field [3]. Conversely, the prevalence of moderate to severe symptoms of posttraumatic stress  
14 was not consistent with reports in the literature [19,31], especially when only severe psychological  
15 impact was considered. In discussing such data, it is worth noting that studies in the field have  
16 employed different tools to ascertain the prevalence of depression, anxiety, and posttraumatic stress,  
17 making it difficult to compare results across studies.

18 Regarding the characterization of depressed participants, in line with the literature, female gender,  
19 low socioeconomic status [5], younger age, and being a student [32] were found to be significant  
20 predictors of depression.

### 21 *Dietary habits*

22 The study of dietary habits during the lockdown showed that participants were not compliant with  
23 the Mediterranean pyramid targets [33]. Half of the sample reported eating fruits and vegetables only  
24 twice a day, even though their recommended consumption is five times a day. In addition, participants  
25 reported eating foods high in fat and sugars (e.g., cakes) a median of 3 times a week (interquartile  
26 range 2-7), meaning that 25% of the sample ate such foods once a day, even though their consumption  
27 is recommended to be occasional. Such findings are in line with the literature, demonstrating that  
28 participants tended to snack more frequently during lockdown [28]. Fish consumption is  
29 recommended three times per week, but participants report eating fish a median of 2 times per week.  
30 We cannot rule out that lockdown might pose difficulties in the purchase of fish.

31 Interestingly, dietary patterns were found to be even worse among participants with symptoms of  
32 depression and psychological impact. They reported frequently eating foods high in fat and sugar and  
33 fruits and vegetables less frequently than participants without symptoms of depression and  
34 psychological impact. Such a finding could be interpreted as emotional eating, which has been  
35 reported during lockdown [15]. However, we can also hypothesize that participants with  
36

1  
2  
3 psychological discomfort had worse eating habits because of a worse socioeconomic status since they  
4 were more likely not to have a job and to live in a smaller house without a garden. However, we  
5 cannot clarify the issue because we did not investigate eating habits before lockdown.  
6  
7

8 The fact that no data about participants' habits before lockdown were available represents a study  
9 limitation. Since no measures were taken before the lockdown started, the present study results can  
10 only provide a characterization of survey respondents during the lockdown, without making reference  
11 to changes in psychological distress symptoms as a result of COVID-19 restrictions. Another  
12 limitation is the nonnegligible proportion of survey responses presenting with missing data and the  
13 higher proportion of responses from high-incidence COVID-19 regions compared with those from  
14 regions with a low incidence of COVID-19. Furthermore, the analysis of missing data showed that  
15 the proportion varied across regions, with the lowest proportion in regions with a high COVID-19  
16 incidence. We cannot rule out that such limits might lead to an overestimation of psychological  
17 distress prevalence; however, when only the proportion of severe depressive symptoms was  
18 considered, it was similar to that reported in the literature. More responses came from high-incidence  
19 COVID-19 regions because residents of those regions were more prone to respond to the survey.  
20 Further, that fact is related to the sampling technique employed, i.e., snowball sampling. The  
21 technique may result in a selection bias by including individuals who belong to a specific social  
22 network and excluding individuals not in that social network, since it was based on personal social  
23 networks. However, snowball sampling is a well-known and widely used sampling technique in the  
24 social sciences.  
25  
26  
27  
28  
29  
30  
31  
32  
33  
34  
35  
36

37 The present work presents several strengths. First, it is one of the largest population-based surveys  
38 conducted in Italy during the first COVID-19 lockdown, providing valuable data about the Italian  
39 population's psychological health. Furthermore, the results provide an analysis of predictors of  
40 psychological distress, depression, and posttraumatic stress, helping identify individuals most  
41 vulnerable to the psychological effects of lockdown.  
42  
43  
44  
45

46 These results have relevant implications for future research and public health. First, they provide  
47 insight into the need to understand the long-term consequences of lockdowns on psychological health  
48 and lifestyle habits, which need to be investigated further since data in the field are lacking. As an  
49 example, did depression symptoms persist after the end of the full lockdown? If yes, did they worsen?  
50 Further, for what concerns the public health perspective, if the long-term effects of lockdowns are  
51 confirmed, the present results help identify vulnerable populations that potentially benefit from  
52 follow-up programs of psychological support in the case of persistent psychological distress.  
53  
54  
55  
56  
57  
58  
59  
60



1  
2  
3  
4  
5  
6  
7  
8  
9  
10  
11  
12  
13  
14  
15  
16  
17  
18  
19  
20  
21  
22  
23  
24  
25  
26  
27  
28  
29  
30  
31  
32  
33  
34  
35  
36  
37  
38  
39  
40  
41  
42  
43  
44  
45  
46  
47  
48  
49  
50  
51  
52  
53  
54  
55  
56  
57  
58  
59  
60

**Author contributions.** DG conception of the work; DG, EM, MS design of the work; SG, SB, and MG data acquisition; DA data analysis; GL interpretation of results and draft of the work; PB and MCG substantial revision of the work.

**Funding.** This research received no specific grant from any funding agency in the public, commercial or not-for-profit sectors.

**Competing interests.** None declared

**Data sharing.** The datasets used and/or analyzed during the current study are available from the corresponding author on reasonable request.

**Patient consent.** Not applicable

**Ethical approval.** Not applicable

## References

- 1 Anderson RM, Heesterbeek H, Klinkenberg D, *et al.* How will country-based mitigation measures influence the course of the COVID-19 epidemic? *The Lancet* 2020.
- 2 Tona F, Plebani M, Gregori D, *et al.* “Stay home stay safe?” Systemic inflammation in subjects undergoing routine hematology tests during the lockdown period of COVID-19. *Clin Chem Lab Med CCLM* 2020;1.
- 3 Salari N, Hosseini-Far A, Jalali R, *et al.* Prevalence of stress, anxiety, depression among the general population during the COVID-19 pandemic: a systematic review and meta-analysis. *Glob Health* 2020;16:1–11.
- 4 Bressan S, Gallo E, Tirelli F, *et al.* Lockdown: more domestic accidents than COVID-19 in children. *Arch Dis Child* 2020.
- 5 Ettman CK, Abdalla SM, Cohen GH, *et al.* Prevalence of Depression Symptoms in US Adults Before and During the COVID-19 Pandemic. *JAMA Netw Open* 2020;3:e2019686–e2019686.
- 6 Fiorenzato E, Zabberoni S, Costa A, *et al.* Cognitive and mental health changes and their vulnerability factors related to COVID-19 lockdown in Italy. *PLoS One* 2021;16:e0246204.
- 7 Fiorillo A, Sampogna G, Giallonardo V, *et al.* Effects of the lockdown on the mental health of the general population during the COVID-19 pandemic in Italy: Results from the COMET collaborative network. *Eur Psychiatry* 2020;63.
- 8 Cellini N, Canale N, Mioni G, *et al.* Changes in sleep pattern, sense of time and digital media use during COVID-19 lockdown in Italy. *J Sleep Res* 2020;:e13074.
- 9 Canello R, Soranna D, Zambra G, *et al.* Determinants of the lifestyle changes during COVID-19 pandemic in the residents of Northern Italy. *Int J Environ Res Public Health* 2020;17:6287.
- 10 Bavli I, Sutton B, Galea S. Harms of public health interventions against covid-19 must not be ignored. *bmj* 2020;371.
- 11 Gregori D, Azzolina D, Lanera C, *et al.* A first estimation of the impact of public health actions against COVID-19 in Veneto (Italy). *J Epidemiol Community Health* Published Online First: 4 May 2020. doi:10.1136/jech-2020-214209
- 12 Magnani C, Azzolina D, Gallo E, *et al.* How Large Was the Mortality Increase Directly and Indirectly Caused by the COVID-19 Epidemic? An Analysis on All-Causes Mortality Data in Italy. *Int J Environ Res Public Health* 2020;17:3452. doi:10.3390/ijerph17103452
- 13 COVID19ita Working Group, Lorenzoni G, Lanera C, *et al.* Is a more aggressive COVID-19 case detection approach mitigating the burden on ICUs? Some reflections from Italy. *Crit Care* 2020;24:175. doi:10.1186/s13054-020-02881-y
- 14 Di Renzo L, Gualtieri P, Cinelli G, *et al.* Psychological Aspects and Eating Habits during COVID-19 Home Confinement: Results of EHLC-COVID-19 Italian Online Survey. *Nutrients* 2020;12:2152.
- 15 Cherikh F, Frey S, Bel C, *et al.* Behavioral food addiction during lockdown: time for awareness, time to prepare the aftermath. *Obes Surg* 2020;:1.

- 16 Cecchetto C, Aiello M, Gentili C, *et al.* Increased emotional eating during COVID-19 associated with lockdown, psychological and social distress. *Appetite* 2021;**160**:105122.
- 17 Schmitz C. LimeSurvey: An open source survey tool. *LimeSurvey Proj Hambg Ger URL* [Httpwww Limesurvey Org](http://www.limesurvey.org) 2012.
- 18 Giorgi G, Perez JML, D'Antonio AC, *et al.* The general health questionnaire (GHQ-12) in a sample of Italian workers: mental health at individual and organizational level. *World J Med Sci* 2014;**11**:47–56.
- 19 Wang C, Pan R, Wan X, *et al.* Immediate psychological responses and associated factors during the initial stage of the 2019 coronavirus disease (COVID-19) epidemic among the general population in China. *Int J Environ Res Public Health* 2020;**17**:1729.
- 20 Craparo G, Faraci P, Rotondo G, *et al.* The Impact of Event Scale–Revised: psychometric properties of the Italian version in a sample of flood victims. *Neuropsychiatr Dis Treat* 2013;**9**:1427.
- 21 Fava GA. Assessing depressive symptoms across cultures: Italian validation of the CES-D self-rating scale. *J Clin Psychol* 1983;**39**:249–51.
- 22 Piccinelli M, Bisoffi G, Bon MG, *et al.* Validity and test-retest reliability of the Italian version of the 12-item General Health Questionnaire in general practice: a comparison between three scoring methods. *Compr Psychiatry* 1993;**34**:198–205.
- 23 Sette S, Le Donne C, Piccinelli R, *et al.* The third National Food Consumption Survey, INRAN-SCAI 2005–06: major dietary sources of nutrients in Italy. *Int J Food Sci Nutr* 2013;**64**:1014–21.
- 24 R Core Team (2019). *R: A language and environment for statistical computing*. R Foundation for Statistical Computing, Vienna, Austria. <https://www.R-project.org>
- 25 Harrell FEJ. rms: Regression Modeling Strategies. R package version 4.1-3. Published Online First: 2014. <http://CRAN.R-project.org/package=rms>
- 26 Brooks SK, Webster RK, Smith LE, *et al.* The psychological impact of quarantine and how to reduce it: rapid review of the evidence. *The Lancet* 2020.
- 27 Amatori S, Donati Zeppa S, Preti A, *et al.* Dietary habits and psychological states during COVID-19 home isolation in Italian college students: the role of physical exercise. *Nutrients* 2020;**12**:3660.
- 28 Sidor A, Rzymiski P. Dietary Choices and Habits during COVID-19 Lockdown: Experience from Poland. *Nutrients* 2020;**12**:1657.
- 29 Scarmozzino F, Visioli F. Covid-19 and the Subsequent Lockdown Modified Dietary Habits of Almost Half the Population in an Italian Sample. *Foods* 2020;**9**:675.
- 30 Pietrobelli A, Pecoraro L, Ferruzzi A, *et al.* Effects of COVID-19 lockdown on lifestyle behaviors in children with obesity living in Verona, Italy: a longitudinal study. *Obesity* 2020.

- 1  
2  
3 31 Karatzias T, Shevlin M, Murphy J, *et al.* Posttraumatic Stress Symptoms and Associated  
4 Comorbidity During the COVID-19 Pandemic in Ireland: A Population-Based Study. *J Trauma*  
5 *Stress* 2020;**33**:365–70.  
6  
7 32 Solomou I, Constantinidou F. Prevalence and predictors of anxiety and depression symptoms  
8 during the COVID-19 pandemic and compliance with precautionary measures: Age and sex  
9 matter. *Int J Environ Res Public Health* 2020;**17**:4924.  
10  
11 33 CREA, Centro di ricerca alimenti e nutrizione. *Dietary Guidelines for Healthy Eating– Revision*  
12 *2018 (Italian: Linee Guida per una sana alimentazione - Revisione 2018)*. 2018.  
13 [https://www.crea.gov.it/documents/59764/0/LINEE-GUIDA+DEFINITIVO+\(1\).pdf/3c13ff3d-](https://www.crea.gov.it/documents/59764/0/LINEE-GUIDA+DEFINITIVO+(1).pdf/3c13ff3d-74dc-88d7-0985-4678aec18537?t=1579191262173)  
14 [74dc-88d7-0985-4678aec18537?t=1579191262173](https://www.crea.gov.it/documents/59764/0/LINEE-GUIDA+DEFINITIVO+(1).pdf/3c13ff3d-74dc-88d7-0985-4678aec18537?t=1579191262173) (accessed 6 Apr 2020).  
15  
16  
17  
18  
19  
20  
21  
22  
23  
24  
25  
26  
27  
28  
29  
30  
31  
32  
33  
34  
35  
36  
37  
38  
39  
40  
41  
42  
43  
44  
45  
46  
47  
48  
49  
50  
51  
52  
53  
54  
55  
56  
57  
58  
59  
60

For peer review only

Table 1. Respondents' characteristics and habits according to GHQ score; 0-13 (no psychological distress), 14-36 (psychological distress). Data are percentages (absolute numbers) for categorical variables and I quartile/Median/III quartile for continuous variables.

|                                        | N    | 0-13<br>(N=507) | 14-36<br>(N=3931) | Combined<br>(N=4438) | P-value |
|----------------------------------------|------|-----------------|-------------------|----------------------|---------|
| Age                                    | 4438 | 26/34/48        | 26/38/53          | 26/37/53             | <0.001  |
| Gender: Female                         | 4438 | 59% (300)       | 64% (2502)        | 63% (2802)           | 0.049   |
| Male                                   |      | 41% (207)       | 36% (1429)        | 37% (1636)           |         |
| Nationality: Other                     | 4438 | 2% (8)          | 1% (53)           | 1% (61)              | 0.676   |
| Italian                                |      | 98% (499)       | 99% (3878)        | 99% (4377)           |         |
| Region: High COVID-19 incidence        | 4427 | 48% (242)       | 45% (1780)        | 46% (2022)           | 0.282   |
| Low COVID-19 incidence                 |      | 52% (263)       | 55% (2142)        | 54% (2405)           |         |
| Educational level: Secondary education | 4438 | 49% (249)       | 47% (1831)        | 47% (2080)           | 0.493   |
| University education                   |      | 50% (256)       | 53% (2089)        | 53% (2345)           |         |
| Primary education                      |      | 0% (2)          | 0% (11)           | 0% (13)              |         |
| Working status: Active employee        | 4438 | 71% (360)       | 67% (2630)        | 67% (2990)           | 0.001   |
| Unemployed/Retired/Homemaker           |      | 8% (42)         | 14% (568)         | 14% (610)            |         |
| Student                                |      | 21% (105)       | 19% (733)         | 19% (838)            |         |
| House type: Multi-family house         | 4438 | 64% (325)       | 66% (2589)        | 66% (2914)           | 0.221   |
| Single room apartment                  |      | 3% (16)         | 2% (79)           | 2% (95)              |         |
| Single-family house                    |      | 33% (166)       | 32% (1263)        | 32% (1429)           |         |
| Garden: No                             | 4438 | 39% (198)       | 42% (1658)        | 42% (1856)           | 0.180   |
| Yes                                    |      | 61% (309)       | 58% (2273)        | 58% (2582)           |         |
| Nasopharyngeal swab: No                | 2873 | 96% (278)       | 93% (2391)        | 93% (2669)           | 0.038   |
| Yes                                    |      | 4% (12)         | 7% (192)          | 7% (204)             |         |
| Recent loss: No                        | 2858 | 91% (266)       | 89% (2289)        | 89% (2555)           | 0.240   |
| Yes                                    |      | 9% (25)         | 11% (278)         | 11% (303)            |         |
| Living alone: No                       | 4438 | 88% (448)       | 88% (3469)        | 88% (3917)           | 0.939   |
| Yes                                    |      | 12% (59)        | 12% (462)         | 12% (521)            |         |
| Pet: No                                | 4438 | 54% (274)       | 54% (2112)        | 54% (2386)           | 0.893   |
| Yes                                    |      | 46% (233)       | 46% (1819)        | 46% (2052)           |         |

|    |                                              |      |           |            |            |        |
|----|----------------------------------------------|------|-----------|------------|------------|--------|
| 1  |                                              |      |           |            |            |        |
| 2  | Physical activity: No                        | 3991 | 44% (203) | 57% (2024) | 56% (2227) | <0.001 |
| 3  | Yes                                          |      | 56% (259) | 43% (1505) | 44% (1764) |        |
| 4  | <hr/>                                        |      |           |            |            |        |
| 5  | Dietary habits (weekly consumption)          |      |           |            |            |        |
| 6  | Pasta, Rice, Cereals                         | 3987 | 5/7/10    | 5/7/10     | 5/7/10     | 0.705  |
| 7  | Cereal-based products                        | 3984 | 3/7/7     | 4/7/7      | 3/7/7      | 0.214  |
| 8  | Raw meat                                     | 3985 | 2/3/4     | 2/3/4      | 2/3/4      | 0.299  |
| 9  | Cured meat                                   | 3981 | 1/2/3     | 1/2/3      | 1/2/3      | 0.050  |
| 10 | Fish                                         | 3985 | 1/2/2     | 1/2/2      | 1/2/2      | 0.864  |
| 11 | Milk and yogurt                              | 3982 | 2/7/7     | 2/7/7      | 2/7/7      | 0.971  |
| 12 | Milk-based products                          | 3984 | 2/3/5     | 2/3/5      | 2/3/5      | 0.675  |
| 13 | Fruit                                        | 3985 | 4/7/10    | 4/7/10     | 4/7/10     | 0.699  |
| 14 | Dried fruit                                  | 3981 | 0/2/5     | 0/2/5      | 0/2/5      | 0.249  |
| 15 | Vegetables                                   | 3984 | 6/7/14    | 6/7/14     | 6/7/14     | 0.003  |
| 16 | Legumes                                      | 3982 | 1/2/5     | 1/2/4      | 1/2/4      | 0.002  |
| 17 | Eggs                                         | 3984 | 1/2/3     | 1/2/2      | 1/2/2      | 0.100  |
| 18 | Foods high in fat and sugar                  | 3980 | 1/3/6     | 2/4/7      | 2/3/7      | 0.158  |
| 19 | Soft drinks                                  | 3979 | 0/0/1     | 0/0/1      | 0/0/1      | 0.478  |
| 20 | Alcoholic drinks (e.g., wine, beer, spirits) | 3981 | 0/1/3     | 0/1/4      | 0/1/4      | 0.080  |
| 21 |                                              |      |           |            |            |        |
| 22 |                                              |      |           |            |            |        |
| 23 |                                              |      |           |            |            |        |
| 24 |                                              |      |           |            |            |        |
| 25 |                                              |      |           |            |            |        |
| 26 |                                              |      |           |            |            |        |
| 27 |                                              |      |           |            |            |        |
| 28 |                                              |      |           |            |            |        |
| 29 |                                              |      |           |            |            |        |
| 30 |                                              |      |           |            |            |        |
| 31 |                                              |      |           |            |            |        |
| 32 |                                              |      |           |            |            |        |
| 33 |                                              |      |           |            |            |        |
| 34 |                                              |      |           |            |            |        |
| 35 |                                              |      |           |            |            |        |
| 36 |                                              |      |           |            |            |        |
| 37 |                                              |      |           |            |            |        |
| 38 |                                              |      |           |            |            |        |
| 39 |                                              |      |           |            |            |        |
| 40 |                                              |      |           |            |            |        |
| 41 |                                              |      |           |            |            |        |
| 42 |                                              |      |           |            |            |        |
| 43 |                                              |      |           |            |            |        |
| 44 |                                              |      |           |            |            |        |
| 45 |                                              |      |           |            |            |        |
| 46 |                                              |      |           |            |            |        |

Table 2. Respondents' characteristics and habits according to CES-D score; 0-15 (no/mild depressive symptoms), 16-23 (moderate depressive symptoms), and 24-60 (severe depressive symptoms). Data are percentages (absolute numbers) for categorical variables and I quartile/Median/III quartile for continuous variables.

|                                        | N    | 0-15<br>(N=2179) | 16-23<br>(N=1057) | 24-60<br>(N=909) | Combined<br>(N=4145) | P-value |
|----------------------------------------|------|------------------|-------------------|------------------|----------------------|---------|
| Age                                    | 4145 | 29/43/57         | 25/34/50          | 23/29/44         | 26/37/53             | <0.001  |
| Gender: Female                         | 4145 | 53% (1165)       | 70% (740)         | 80% (729)        | 64% (2634)           | <0.001  |
| Male                                   |      | 47% (1014)       | 30% (317)         | 20% (180)        | 36% (1511)           |         |
| Nationality: Other                     | 4145 | 1% (27)          | 2% (17)           | 1% (9)           | 1% (53)              | 0.464   |
| Italian                                |      | 99% (2152)       | 98% (1040)        | 99% (900)        | 99% (4092)           |         |
| Region: High COVID-19 incidence        | 4135 | 45% (976)        | 44% (464)         | 48% (431)        | 45% (1871)           | 0.258   |
| Low COVID-19 incidence                 |      | 55% (1200)       | 56% (589)         | 52% (475)        | 55% (2264)           |         |
| Educational level: Secondary education | 4145 | 45% (976)        | 44% (464)         | 52% (476)        | 46% (1916)           | <0.001  |
| University education                   |      | 55% (1196)       | 56% (593)         | 47% (431)        | 54% (2220)           |         |
| Primary education                      |      | 0% (7)           | 0% (0)            | 0% (2)           | 0% (9)               |         |
| Working status: Active employee        | 4145 | 73% (1583)       | 67% (709)         | 57% (521)        | 68% (2813)           | <0.001  |
| Unemployed/Retired/Homemaker           |      | 16% (338)        | 12% (130)         | 12% (111)        | 14% (579)            |         |
| Student                                |      | 12% (258)        | 21% (218)         | 30% (277)        | 18% (753)            |         |
| House type: Multi-family house         | 4145 | 63% (1369)       | 68% (715)         | 69% (628)        | 65% (2712)           | 0.001   |
| Single room apartment                  |      | 2% (40)          | 2% (23)           | 3% (25)          | 2% (88)              |         |
| Single-family house                    |      | 35% (770)        | 30% (319)         | 28% (256)        | 32% (1345)           |         |
| Garden: No                             | 4145 | 36% (781)        | 44% (467)         | 52% (475)        | 42% (1723)           | <0.001  |
| Yes                                    |      | 64% (1398)       | 56% (590)         | 48% (434)        | 58% (2422)           |         |
| Nasopharyngeal swab: No                | 2684 | 92% (1223)       | 92% (612)         | 95% (660)        | 93% (2495)           | 0.023   |
| Yes                                    |      | 8% (106)         | 8% (50)           | 5% (33)          | 7% (189)             |         |
| Recent loss: No                        | 2665 | 90% (1194)       | 89% (584)         | 88% (606)        | 89% (2384)           | 0.277   |
| Yes                                    |      | 10% (127)        | 11% (73)          | 12% (81)         | 11% (281)            |         |
| Living alone: No                       | 4145 | 89% (1937)       | 89% (937)         | 86% (778)        | 88% (3652)           | 0.029   |
| Yes                                    |      | 11% (242)        | 11% (120)         | 14% (131)        | 12% (493)            |         |

|                                              |      |            |           |           |            |        |
|----------------------------------------------|------|------------|-----------|-----------|------------|--------|
| Pet: No                                      | 4145 | 54% (1179) | 53% (565) | 52% (470) | 53% (2214) | 0.475  |
| Yes                                          |      | 46% (1000) | 47% (492) | 48% (439) | 47% (1931) |        |
| Physical activity: No                        | 3991 | 53% (1123) | 56% (573) | 61% (531) | 56% (2227) | 0.001  |
| Yes                                          |      | 47% (981)  | 44% (445) | 39% (338) | 44% (1764) |        |
| <i>Dietary habits (weekly consumption)</i>   |      |            |           |           |            |        |
| Pasta, Rice, Cereals                         | 3987 | 5/7/10     | 5/7/10    | 5/7/10    | 5/7/10     | 0.182  |
| Cereal-based products                        | 3984 | 3/7/7      | 4/7/7     | 4/7/7     | 3/7/7      | 0.135  |
| Raw meat                                     | 3985 | 2/3/4      | 2/3/4     | 2/3/4     | 2/3/4      | 0.418  |
| Cured meat                                   | 3981 | 1/2/3      | 1/2/3     | 1/2/3     | 1/2/3      | 0.243  |
| Fish                                         | 3985 | 1/2/2      | 1/2/2     | 1/2/2     | 1/2/2      | 0.003  |
| Milk and yogurt                              | 3982 | 1/7/7      | 2/7/7     | 2/7/7     | 2/7/7      | 0.309  |
| Milk-based products                          | 3984 | 2/3/5.25   | 2/3/5     | 1/3/5     | 2/3/5      | <0.001 |
| Fruit                                        | 3985 | 5/7/12     | 3/7/10    | 3/7/10    | 4/7/10     | <0.001 |
| Dried fruit                                  | 3981 | 0/2/5      | 0/2/5     | 0/1/4     | 0/2/5      | <0.001 |
| Vegetables                                   | 3984 | 6/7/14     | 5/7/14    | 5/7/14    | 6/7/14     | 0.013  |
| Legumes                                      | 3982 | 1/3/4      | 2/3/4     | 1/2/4     | 1/3/4      | 0.059  |
| Eggs                                         | 3984 | 1/2/2      | 1/2/2     | 1/2/2     | 1/2/2      | 0.442  |
| Foods high in fat and sugar                  | 3980 | 1/3/6      | 2/4/7     | 2/4/7     | 2/3/7      | 0.008  |
| Soft drinks                                  | 3979 | 0/0/1      | 0/0/1     | 0/0/1     | 0/0/1      | 0.002  |
| Alcoholic drinks (e.g., wine, beer, spirits) | 3981 | 0/2/5      | 0/1/4     | 0/1/3     | 0/1/4      | <0.001 |



Table 3. Respondents' characteristics and habits according to IESD-R score; 0–23 (normal), 24–32 (mild psychological impact), 33–36 (moderate psychological impact), and  $\geq 37$  (severe psychological impact). Data are percentages (absolute numbers) for categorical variables and I quartile/Median/III quartile for continuous variables.

|                                        | N    | 0-23<br>(N=2463) | 24-32<br>(N=827) | 33-36<br>(N=242) | $\geq 37$<br>(N=762) | Combined<br>(N=4294) | P-<br>value |
|----------------------------------------|------|------------------|------------------|------------------|----------------------|----------------------|-------------|
| Age                                    | 4294 | 27/40/55         | 26/37/53         | 25/33/49         | 25/33/47             | 26/37/53             | <0.001      |
| Gender: Female                         | 4294 | 52% (1279)       | 73% (600)        | 85% (205)        | 83% (633)            | 63% (2717)           | <0.001      |
| Male                                   |      | 48% (1184)       | 27% (227)        | 15% (37)         | 17% (129)            | 37% (1577)           |             |
| Nationality: Other                     | 4294 | 1% (30)          | 1% (12)          | 1% (3)           | 1% (10)              | 1% (55)              | 0.965       |
| Italian                                |      | 99% (2433)       | 99% (815)        | 99% (239)        | 99% (752)            | 99% (4239)           |             |
| Region: High COVID-19 incidence        | 4284 | 44% (1090)       | 47% (385)        | 48% (115)        | 47% (357)            | 45% (1947)           | 0.377       |
| Low COVID-19 incidence                 |      | 56% (1370)       | 53% (440)        | 52% (127)        | 53% (400)            | 55% (2337)           |             |
| Educational level: Secondary education | 4294 | 44% (1087)       | 48% (397)        | 50% (121)        | 51% (390)            | 46% (1995)           | 0.009       |
| University education                   |      | 56% (1368)       | 52% (430)        | 50% (120)        | 48% (369)            | 53% (2287)           |             |
| Primary education                      |      | 0% (8)           | 0% (0)           | 0% (1)           | 0% (3)               | 0% (12)              |             |
| Working status: Active employee        | 4294 | 70% (1720)       | 66% (543)        | 62% (151)        | 65% (494)            | 68% (2908)           | 0.001       |
| Unemployed/Retired/Homemaker           |      | 14% (349)        | 14% (115)        | 14% (34)         | 13% (100)            | 14% (598)            |             |
| Student                                |      | 16% (394)        | 20% (169)        | 24% (57)         | 22% (168)            | 18% (788)            |             |
| House type: Multi-family house         | 4294 | 64% (1586)       | 65% (538)        | 76% (183)        | 67% (512)            | 66% (2819)           | 0.003       |
| Single room apartment                  |      | 2% (49)          | 2% (19)          | 1% (2)           | 3% (25)              | 2% (95)              |             |
| Single-family house                    |      | 34% (828)        | 33% (270)        | 24% (57)         | 30% (225)            | 32% (1380)           |             |
| Garden: No                             | 4294 | 38% (935)        | 43% (355)        | 52% (126)        | 49% (375)            | 42% (1791)           | <0.001      |
| Yes                                    |      | 62% (1528)       | 57% (472)        | 48% (116)        | 51% (387)            | 58% (2503)           |             |
| Nasopharyngeal swab: No                | 2774 | 93% (1482)       | 92% (454)        | 93% (151)        | 95% (491)            | 93% (2578)           | 0.418       |
| Yes                                    |      | 7% (120)         | 8% (37)          | 7% (11)          | 5% (28)              | 7% (196)             |             |
| Recent loss: No                        | 2759 | 91% (1458)       | 87% (423)        | 88% (139)        | 87% (452)            | 90% (2472)           | 0.004       |
| Yes                                    |      | 9% (137)         | 13% (64)         | 12% (19)         | 13% (67)             | 10% (287)            |             |
| Living alone: No                       | 4294 | 88% (2170)       | 89% (737)        | 88% (214)        | 87% (663)            | 88% (3784)           | 0.635       |
| Yes                                    |      | 12% (293)        | 11% (90)         | 12% (28)         | 13% (99)             | 12% (510)            |             |

|    |                                              |      |            |           |           |           |            |        |
|----|----------------------------------------------|------|------------|-----------|-----------|-----------|------------|--------|
| 1  |                                              |      |            |           |           |           |            |        |
| 2  | Pet: No                                      | 4294 | 54% (1332) | 52% (426) | 63% (152) | 52% (397) | 54% (2307) | 0.014  |
| 3  | Yes                                          |      | 46% (1131) | 48% (401) | 37% (90)  | 48% (365) | 46% (1987) |        |
| 4  | Physical activity: No                        | 3991 | 53% (1220) | 58% (443) | 59% (132) | 61% (432) | 56% (2227) | <0.001 |
| 5  | Yes                                          |      | 47% (1081) | 42% (317) | 41% (93)  | 39% (273) | 44% (1764) |        |
| 6  | <hr/>                                        |      |            |           |           |           |            |        |
| 7  | Dietary habits (weekly consumption)          |      |            |           |           |           |            |        |
| 8  | Pasta, Rice, Cereals                         | 3987 | 5/7/10     | 6/7/10    | 5/7/10    | 5/7/10    | 5/7/10     | 0.560  |
| 9  | Cereal-based products                        | 3984 | 3/7/7      | 4/7/7     | 4/7/7     | 4/7/7     | 3/7/7      | 0.018  |
| 10 | Raw meat                                     | 3985 | 2/3/4      | 2/3/4     | 2/3/4     | 2/3/4     | 2/3/4      | 0.150  |
| 11 | Cured meat                                   | 3981 | 1/2/3      | 1/2/3     | 1/2/3     | 1/2/3     | 1/2/3      | 0.404  |
| 12 | Fish                                         | 3985 | 1/2/2      | 1/2/2     | 1/1/2     | 1/2/2     | 1/2/2      | 0.443  |
| 13 | Milk and yogurt                              | 3982 | 2/7/7      | 2/6/7     | 2/7/7     | 2/6/7     | 2/7/7      | 0.398  |
| 14 | Milk-based products                          | 3984 | 2/3/5      | 2/3/5     | 1/3/5     | 2/3/5     | 2/3/5      | 0.002  |
| 15 | Fruit                                        | 3985 | 4/7/10     | 4/7/10    | 3/7/14    | 3/7/8.75  | 4/7/10     | 0.003  |
| 16 | Dried fruit                                  | 3981 | 0/2/5      | 0/2/5     | 0/1/5     | 0/2/4     | 0/2/5      | 0.061  |
| 17 | Vegetables                                   | 3984 | 6/7/14     | 6/7/14    | 6/7/14    | 5/7/14    | 6/7/14     | 0.043  |
| 18 | Legumes                                      | 3982 | 1/3/4      | 1/2/4     | 1/2/4     | 1/2/4     | 1/3/4      | 0.710  |
| 19 | Eggs                                         | 3984 | 1/2/2      | 1/2/2     | 1/2/2     | 1/2/3     | 1/2/2      | 0.836  |
| 20 | Foods high in fat and sugar                  | 3980 | 1/3/6      | 2/3/6     | 2/4/7     | 2/4/7     | 2/3/7      | 0.012  |
| 21 | Soft drinks                                  | 3979 | 0/0/1      | 0/0/1     | 0/0/1     | 0/0/2     | 0/0/1      | <0.001 |
| 22 | Alcoholic drinks (e.g., wine, beer, spirits) | 3981 | 0/2/4      | 0/1/3     | 0/1/3     | 0/1/3     | 0/1/4      | <0.001 |
| 23 | <hr/>                                        |      |            |           |           |           |            |        |
| 24 |                                              |      |            |           |           |           |            |        |
| 25 |                                              |      |            |           |           |           |            |        |
| 26 |                                              |      |            |           |           |           |            |        |
| 27 |                                              |      |            |           |           |           |            |        |
| 28 |                                              |      |            |           |           |           |            |        |
| 29 |                                              |      |            |           |           |           |            |        |
| 30 |                                              |      |            |           |           |           |            |        |
| 31 |                                              |      |            |           |           |           |            |        |
| 32 |                                              |      |            |           |           |           |            |        |
| 33 |                                              |      |            |           |           |           |            |        |
| 34 |                                              |      |            |           |           |           |            |        |
| 35 |                                              |      |            |           |           |           |            |        |
| 36 |                                              |      |            |           |           |           |            |        |
| 37 |                                              |      |            |           |           |           |            |        |
| 38 |                                              |      |            |           |           |           |            |        |
| 39 |                                              |      |            |           |           |           |            |        |
| 40 |                                              |      |            |           |           |           |            |        |
| 41 |                                              |      |            |           |           |           |            |        |
| 42 |                                              |      |            |           |           |           |            |        |
| 43 |                                              |      |            |           |           |           |            |        |
| 44 |                                              |      |            |           |           |           |            |        |
| 45 |                                              |      |            |           |           |           |            |        |
| 46 |                                              |      |            |           |           |           |            |        |

Table 4. Results of the multivariable models (proportional odds model for the ordinal responses with more than two categories, i.e., CES-D and IES-R, logistic regression model for the binary response variable, i.e., GHQ-12). For continuous variables, the effect is reported on the interquartile range (IQR), i.e., 26-54 for age and 3-20 for days from the start of the survey). Results are reported as odds ratios (logistic regression) or proportional odds (proportional odds model), 95% confidence intervals (CI), P-value

Supplementary Material

|                                                                  | OR   | Lower 0.95 | Upper 0.95 |
|------------------------------------------------------------------|------|------------|------------|
| <i>GHQ</i>                                                       |      |            |            |
| Days from the start of the survey                                | 1.19 | 0.95       | 1.49       |
| Gender: Male vs. Female                                          | 0.77 | 0.63       | 0.94       |
| Region: Low-incidence vs. High-incidence                         | 0.87 | 0.72       | 1.06       |
| Working status: Unemployed/Retired/Homemaker vs. Active employee | 1.99 | 1.4        | 2.85       |
| Working status: Student vs. Active employee                      | 1.10 | 0.85       | 1.43       |
| Physical activity: Yes vs. No                                    | 0.56 | 0.46       | 0.69       |
| <i>CES-D</i>                                                     |      |            |            |
| Days from the start of the survey                                | 1.38 | 1.00       | 1.89       |
| Age                                                              | 0.39 | 0.32       | 0.48       |
| Gender: Male vs. Female                                          | 0.46 | 0.39       | 0.55       |
| Working status: Unemployed/Retired/Homemaker vs. Active employee | 1.57 | 1.22       | 2.02       |
| Working status: Student vs. Active employee                      | 1.73 | 1.31       | 2.28       |
| Garden: No vs. Yes                                               | 1.72 | 1.46       | 2.01       |
| Recent Loss: Yes vs. No                                          | 1.35 | 1.05       | 1.72       |
| Living alone: Yes vs. No                                         | 1.50 | 1.17       | 1.91       |
| Physical activity: Yes vs. No                                    | 0.64 | 0.55       | 0.75       |
| <i>IES-R</i>                                                     |      |            |            |
| Days from the start of the survey                                | 1.03 | 0.75       | 1.42       |
| Age                                                              | 0.67 | 0.58       | 0.78       |
| Gender: Male vs. Female                                          | 0.30 | 0.25       | 0.37       |
| Educational level: Secondary vs. University                      | 1.29 | 1.10       | 1.52       |

|    |                                           |      |      |      |
|----|-------------------------------------------|------|------|------|
| 1  |                                           |      |      |      |
| 2  | Educational level: Primary vs. University | 0.48 | 0.05 | 4.55 |
| 3  | Garden: No vs. Yes                        | 1.55 | 1.33 | 1.82 |
| 4  | Recent Loss: Yes vs. No                   | 1.63 | 1.28 | 2.09 |
| 5  | Physical activity: Yes vs. No             | 0.72 | 0.61 | 0.84 |
| 6  |                                           |      |      |      |
| 7  |                                           |      |      |      |
| 8  |                                           |      |      |      |
| 9  |                                           |      |      |      |
| 10 |                                           |      |      |      |
| 11 |                                           |      |      |      |
| 12 |                                           |      |      |      |
| 13 |                                           |      |      |      |
| 14 |                                           |      |      |      |
| 15 |                                           |      |      |      |
| 16 |                                           |      |      |      |
| 17 |                                           |      |      |      |
| 18 |                                           |      |      |      |
| 19 |                                           |      |      |      |
| 20 |                                           |      |      |      |
| 21 |                                           |      |      |      |
| 22 |                                           |      |      |      |
| 23 |                                           |      |      |      |
| 24 |                                           |      |      |      |
| 25 |                                           |      |      |      |
| 26 |                                           |      |      |      |
| 27 |                                           |      |      |      |
| 28 |                                           |      |      |      |
| 29 |                                           |      |      |      |
| 30 |                                           |      |      |      |
| 31 |                                           |      |      |      |
| 32 |                                           |      |      |      |
| 33 |                                           |      |      |      |
| 34 |                                           |      |      |      |
| 35 |                                           |      |      |      |
| 36 |                                           |      |      |      |
| 37 |                                           |      |      |      |
| 38 |                                           |      |      |      |
| 39 |                                           |      |      |      |
| 40 |                                           |      |      |      |
| 41 |                                           |      |      |      |
| 42 |                                           |      |      |      |
| 43 |                                           |      |      |      |
| 44 |                                           |      |      |      |
| 45 |                                           |      |      |      |
| 46 |                                           |      |      |      |

For peer review only

Table S1. Respondents characteristics and habits according to residency; high incidence of COVID-19 regions (i.e., Piemonte, Veneto, Lombardia, Emilia-Romagna) and low incidence COVID-19 regions.

|                                            | N    | Low COVID-19 Incidence<br>(N=2301) | High COVID-19 Incidence<br>(N=2677) | Combined<br>(N=4978) | P-value |
|--------------------------------------------|------|------------------------------------|-------------------------------------|----------------------|---------|
| Age                                        | 4978 | 25/36/53                           | 27/39/55                            | 26/38/54             | <0.001  |
| Gender: Female                             | 4974 | 63% (1454)                         | 63% (1676)                          | 63% (3130)           | 0.614   |
| Male                                       |      | 37% (43)                           | 37% (1001)                          | 37% (1844)           |         |
| Nationality: Other                         | 4977 | 2% (42)                            | 1% (31)                             | 1% (73)              | 0.051   |
| Italian                                    |      | 98% (2259)                         | 99% (2645)                          | 99% (4904)           |         |
| Educational level: Secondary education     | 4973 | 51% (1175)                         | 45% (1193)                          | 48% (2368)           | <0.001  |
| University education                       |      | 48% (1113)                         | 55% (1475)                          | 52% (2588)           |         |
| Primary education                          |      | 0% (10)                            | 0% (7)                              | 0% (17)              |         |
| Working status: Active employee            | 4972 | 63% (1442)                         | 70% (1877)                          | 67% (3319)           | <0.001  |
| Unemployed/Retired/Homemaker               |      | 16% (376)                          | 13% (360)                           | 15% (736)            |         |
| Student                                    |      | 21% (481)                          | 16% (436)                           | 18% (917)            |         |
| House type: Multi-family house             | 4969 | 72% (1660)                         | 60% (1603)                          | 66% (3263)           | <0.001  |
| Single room apartment                      |      | 3% (60)                            | 2% (51)                             | 2% (111)             |         |
| Single-family house                        |      | 25% (579)                          | 38% (1016)                          | 32% (1595)           |         |
| Garden: No                                 | 4967 | 50% (1150)                         | 35% (932)                           | 42% (2082)           | <0.001  |
| Yes                                        |      | 50% (1147)                         | 65% (1738)                          | 58% (2885)           |         |
| Nasopharyngeal swab: No                    | 3221 | 97% (1371)                         | 90% (1623)                          | 93% (2994)           | <0.001  |
| Yes                                        |      | 3% (39)                            | 10% (188)                           | 7% (227)             |         |
| Recent loss: No                            | 3208 | 90% (1267)                         | 89% (1604)                          | 89% (2871)           | 0.186   |
| Yes                                        |      | 10% (136)                          | 11% (201)                           | 11% (337)            |         |
| Living alone: No                           | 4870 | 89% (1995)                         | 88% (2315)                          | 89% (4310)           | 0.196   |
| Yes                                        |      | 11% (243)                          | 12% (317)                           | 11% (560)            |         |
| Physical activity: No                      | 3981 | 55% (971)                          | 57% (1251)                          | 56% (2222)           | 0.159   |
| Yes                                        |      | 45% (808)                          | 43% (951)                           | 44% (1759)           |         |
| <i>Dietary habits (weekly consumption)</i> |      |                                    |                                     |                      |         |

|    |                                              |      |          |        |        |        |
|----|----------------------------------------------|------|----------|--------|--------|--------|
| 1  |                                              |      |          |        |        |        |
| 2  | Pasta, Rice, Cereals                         | 3977 | 5/7/10   | 5/7/10 | 5/7/10 | 0.215  |
| 3  | Cereal-based products                        | 3974 | 3/7/7    | 4/7/7  | 4/7/7  | <0.001 |
| 4  | Raw meat                                     | 3975 | 2/3/4.25 | 2/3/4  | 2/3/4  | 0.005  |
| 5  | Cured meat                                   | 3971 | 1/2/3    | 1/2/3  | 1/2/3  | <0.001 |
| 6  | Fish                                         | 3975 | 1/2/3    | 1/1/2  | 1/2/2  | <0.001 |
| 7  | Milk and yogurt                              | 3972 | 2/7/7    | 2/7/7  | 2/7/7  | 0.782  |
| 8  | Milk-based products                          | 3974 | 2/3/5    | 2/3/5  | 2/3/5  | 0.017  |
| 9  | Fruit                                        | 3975 | 4/7/10   | 4/7/12 | 4/7/10 | <0.001 |
| 10 | Dried fruit                                  | 3971 | 0/2/5    | 0/2/5  | 0/2/5  | 0.25   |
| 11 | Vegetables                                   | 3974 | 5/7/14   | 6/7/14 | 6/7/14 | <0.001 |
| 12 | Legumes                                      | 3972 | 2/3/4    | 1/2/4  | 1/3/4  | 0.005  |
| 13 | Eggs                                         | 3974 | 1/2/3    | 1/2/2  | 1/2/2  | 0.014  |
| 14 | Food high in fat and sugar                   | 3970 | 1/3/6    | 2/4/7  | 2/3/7  | 0.241  |
| 15 | Soft drinks                                  | 3969 | 0/0/1    | 0/0/1  | 0/0/1  | 0.969  |
| 16 | Alcoholic drinks (e.g., wine, beer, spirits) | 3971 | 0/1/4    | 0/1/4  | 0/1/4  | 0.001  |
| 17 |                                              |      |          |        |        |        |
| 18 |                                              |      |          |        |        |        |
| 19 |                                              |      |          |        |        |        |
| 20 |                                              |      |          |        |        |        |
| 21 |                                              |      |          |        |        |        |
| 22 |                                              |      |          |        |        |        |
| 23 |                                              |      |          |        |        |        |
| 24 |                                              |      |          |        |        |        |
| 25 |                                              |      |          |        |        |        |
| 26 |                                              |      |          |        |        |        |
| 27 |                                              |      |          |        |        |        |
| 28 |                                              |      |          |        |        |        |
| 29 |                                              |      |          |        |        |        |
| 30 |                                              |      |          |        |        |        |
| 31 |                                              |      |          |        |        |        |
| 32 |                                              |      |          |        |        |        |
| 33 |                                              |      |          |        |        |        |
| 34 |                                              |      |          |        |        |        |
| 35 |                                              |      |          |        |        |        |
| 36 |                                              |      |          |        |        |        |
| 37 |                                              |      |          |        |        |        |
| 38 |                                              |      |          |        |        |        |
| 39 |                                              |      |          |        |        |        |
| 40 |                                              |      |          |        |        |        |
| 41 |                                              |      |          |        |        |        |
| 42 |                                              |      |          |        |        |        |
| 43 |                                              |      |          |        |        |        |
| 44 |                                              |      |          |        |        |        |
| 45 |                                              |      |          |        |        |        |
| 46 |                                              |      |          |        |        |        |

Figure S1. Survey response report. Panel A reports the weekly response rate, calculated as the proportion of survey responses over the number of accesses to the survey website. The dotted line represents the overall response rate (84.5%). Panel B represents the number of responses per day. Panel C reports the number of website accesses per day. Panel D reports the number of accesses per region.

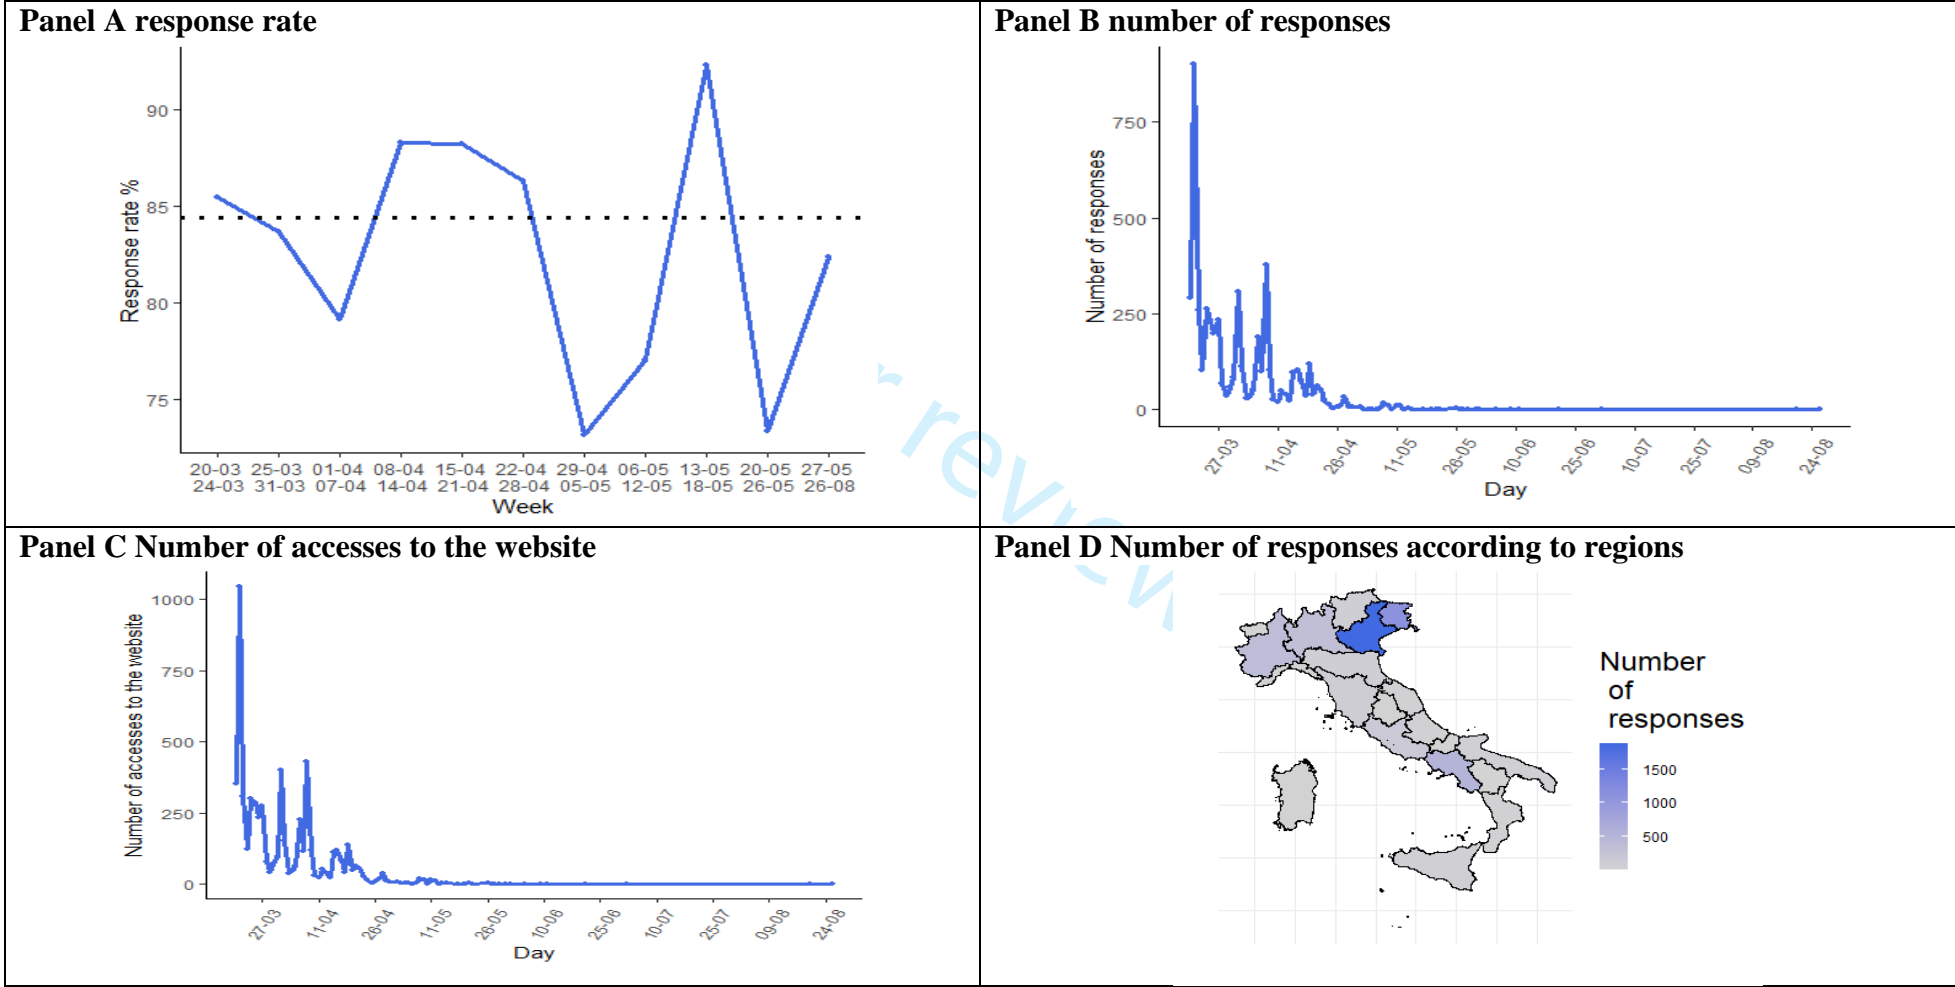

Figure S2. Missing Responses report. Percentage of missing responses per region. The dotted line represents the overall survey missing rate computed as a percentage (29.9%) of complete responses over the survey questionnaire





**STROBE 2007 (v4) Statement—Checklist of items that should be included in reports of *cross-sectional studies***

| Section/Topic                | Item # | Recommendation                                                                                                                                                                       | Reported on page # |
|------------------------------|--------|--------------------------------------------------------------------------------------------------------------------------------------------------------------------------------------|--------------------|
| <b>Title and abstract</b>    | 1      | (a) Indicate the study's design with a commonly used term in the title or the abstract                                                                                               | 1-3                |
|                              |        | (b) Provide in the abstract an informative and balanced summary of what was done and what was found                                                                                  | 3                  |
| <b>Introduction</b>          |        |                                                                                                                                                                                      |                    |
| Background/rationale         | 2      | Explain the scientific background and rationale for the investigation being reported                                                                                                 | 5                  |
| Objectives                   | 3      | State specific objectives, including any prespecified hypotheses                                                                                                                     | 5                  |
| <b>Methods</b>               |        |                                                                                                                                                                                      |                    |
| Study design                 | 4      | Present key elements of study design early in the paper                                                                                                                              | 5-6                |
| Setting                      | 5      | Describe the setting, locations, and relevant dates, including periods of recruitment, exposure, follow-up, and data collection                                                      | 6                  |
| Participants                 | 6      | (a) Give the eligibility criteria, and the sources and methods of selection of participants                                                                                          | 6                  |
| Variables                    | 7      | Clearly define all outcomes, exposures, predictors, potential confounders, and effect modifiers. Give diagnostic criteria, if applicable                                             | 6                  |
| Data sources/<br>measurement | 8*     | For each variable of interest, give sources of data and details of methods of assessment (measurement). Describe comparability of assessment methods if there is more than one group | 6                  |
| Bias                         | 9      | Describe any efforts to address potential sources of bias                                                                                                                            | 6                  |
| Study size                   | 10     | Explain how the study size was arrived at                                                                                                                                            | NA                 |
| Quantitative variables       | 11     | Explain how quantitative variables were handled in the analyses. If applicable, describe which groupings were chosen and why                                                         | 7                  |
| Statistical methods          | 12     | (a) Describe all statistical methods, including those used to control for confounding                                                                                                | 7                  |
|                              |        | (b) Describe any methods used to examine subgroups and interactions                                                                                                                  | NA                 |
|                              |        | (c) Explain how missing data were addressed                                                                                                                                          | 7                  |
|                              |        | (d) If applicable, describe analytical methods taking account of sampling strategy                                                                                                   | 7                  |
|                              |        | (e) Describe any sensitivity analyses                                                                                                                                                | NA                 |
| <b>Results</b>               |        |                                                                                                                                                                                      |                    |

|                          |     |                                                                                                                                                                                                              |         |
|--------------------------|-----|--------------------------------------------------------------------------------------------------------------------------------------------------------------------------------------------------------------|---------|
| Participants             | 13* | (a) Report numbers of individuals at each stage of study—eg numbers potentially eligible, examined for eligibility, confirmed eligible, included in the study, completing follow-up, and analysed            | 7       |
|                          |     | (b) Give reasons for non-participation at each stage                                                                                                                                                         | NA      |
|                          |     | (c) Consider use of a flow diagram                                                                                                                                                                           | NA      |
| Descriptive data         | 14* | (a) Give characteristics of study participants (eg demographic, clinical, social) and information on exposures and potential confounders                                                                     | 7       |
|                          |     | (b) Indicate number of participants with missing data for each variable of interest                                                                                                                          | Table 1 |
| Outcome data             | 15* | Report numbers of outcome events or summary measures                                                                                                                                                         | 7       |
| Main results             | 16  | (a) Give unadjusted estimates and, if applicable, confounder-adjusted estimates and their precision (eg, 95% confidence interval). Make clear which confounders were adjusted for and why they were included | 7-8     |
|                          |     | (b) Report category boundaries when continuous variables were categorized                                                                                                                                    | 7-8     |
|                          |     | (c) If relevant, consider translating estimates of relative risk into absolute risk for a meaningful time period                                                                                             | NA      |
| Other analyses           | 17  | Report other analyses done—eg analyses of subgroups and interactions, and sensitivity analyses                                                                                                               | NA      |
| <b>Discussion</b>        |     |                                                                                                                                                                                                              |         |
| Key results              | 18  | Summarise key results with reference to study objectives                                                                                                                                                     | 9       |
| Limitations              | 19  | Discuss limitations of the study, taking into account sources of potential bias or imprecision. Discuss both direction and magnitude of any potential bias                                                   | 10      |
| Interpretation           | 20  | Give a cautious overall interpretation of results considering objectives, limitations, multiplicity of analyses, results from similar studies, and other relevant evidence                                   | 10      |
| Generalisability         | 21  | Discuss the generalisability (external validity) of the study results                                                                                                                                        | 10      |
| <b>Other information</b> |     |                                                                                                                                                                                                              |         |
| Funding                  | 22  | Give the source of funding and the role of the funders for the present study and, if applicable, for the original study on which the present article is based                                                | 11      |

\*Give information separately for cases and controls in case-control studies and, if applicable, for exposed and unexposed groups in cohort and cross-sectional studies.

**Note:** An Explanation and Elaboration article discusses each checklist item and gives methodological background and published examples of transparent reporting. The STROBE checklist is best used in conjunction with this article (freely available on the Web sites of PLoS Medicine at <http://www.plosmedicine.org/>, Annals of Internal Medicine at <http://www.annals.org/>, and Epidemiology at <http://www.epidem.com/>). Information on the STROBE Initiative is available at [www.strobe-statement.org](http://www.strobe-statement.org).
